# Supplementary material for: From single-cell to cell-pool transcriptomes: Stochasticity in gene expression and RNA splicing
Source: PubMed Central journal article supplement — Genome Res. 2014 Mar;24(3):496–510. doi: 10.1101/gr.161034.113 (PMC3941114; doi:10.1101/gr.161034.113), 2014-03
Supplement: supp_gr.161034.113_Supplemental_Material.pdf [file supp_gr.161034.113_Supplemental_Material.pdf]

# From single-cell to cell-pool transcriptomes: stochasticity in gene expression and RNA splicing

## Supplementary Materials

GEORGI K. MARINOV<sup>1,\*</sup>, BRIAN A. WILLIAMS<sup>1,\*</sup>, KEN MCCUE<sup>1</sup>, GARY P. SCHROTH<sup>2</sup>, JASON GERTZ<sup>3</sup>, RICHARD M. MYERS<sup>3</sup>, AND BARBARA J. WOLD<sup>1</sup>

<sup>1</sup>*Division of Biology, California Institute of Technology, Pasadena, CA 91125, USA*

<sup>2</sup>*Illumina, Inc., Hayward, CA 94545, USA*

<sup>3</sup>*HudsonAlpha Institute for Biotechnology, Huntsville, Alabama 35806, USA*

*\*These authors contributed equally to this work*

## Supplementary Methods

Except where specified otherwise, all computational processing was carried out using custom-written Python scripts.

### Single cell collection

Single cell harvesting from live cultures requires a micropipet with a polished glass tip with an approximate diameter of  $40\mu\text{m}$ . Borosilicate glass microfiber pipettes (FHC omega dot fiber 30-30-0) were pulled on a Sutter Instruments P80/PC microcapillary puller with the following parameters: 750 heat, 150 pull, 100 velocity, 5 time. After pulling, the microcapillary tips were mounted on a glass microscope slide using modeling clay, and broken by closing a pair of #5 Dumont forceps around the glass. We used a scaled eyepiece reticle to judge the width of the break at about  $40\mu\text{m}$ . After breaking, the tips were smoothed using a microforge. To prevent sticking of cells to the interior of the capillary, we treated the pipettes with Sigmacote by attaching Tygon tubing and a syringe to the blunt end of the microcapillary, and drawing the Sigmacote solution into the tip. This also provided assurance that the forged tips had not closed. The capillaries were then rinsed with distilled water twice using the same technique, and allowed to dry at room temperature overnight.

An aliquot ( $5 \times 10^6$  cells) of GM12878 cells were thawed rapidly and cultured in 10mL of medium (RPMI 1640, 15% FBS, 2mM L-glutamine, 1% penicillin-streptomycin). The cells were grown at density of  $2 \times 10^5 - 2 \times 10^6$  cells/mL of medium for 11 days until harvest. On the day prior to harvest, the culture volume was increased to 100mL by

the addition of fresh medium, bringing the density to  $2 \times 10^5$  cells/mL. At harvest time (23 hours later), cells were triturated using a 10mL pipette, and a small aliquot ( $\sim 100\mu\text{L}$ s) of the culture was removed. A few  $\mu\text{L}$ s of the cell suspension was added to a  $250\mu\text{L}$  volume of "cell picking medium" (RPMI1640 with 15% Superblock (Pierce catalog #37515) and 2mM glutamine). This diluted cell suspension was then placed in a 3cm culture dish and returned to the  $37^\circ\text{C}$  incubator for 10 minutes prior to single cell harvesting.

The microcapillary pipet was mounted on a micromanipulator and attached to a  $100\mu\text{L}$  glass syringe via Tygon tubing. A dish of picking medium was brought to the illuminated stage on the phase contrast scope, and the tip was submerged using the micromanipulator. Picking medium was drawn up into the microcapillary to a height of about 75mm. The tip was removed from the picking medium, re-submerged into a dish from the incubator containing the dilute cell suspension, and lowered gently to the floor of the dish. Individual cells were aspirated into the pipet by gentle vacuum applied via the glass syringe. When a single cell had been aspirated, the tip was rapidly lifted out of the picking medium, and the picking dish was removed from the illuminated area of the stage. A small sliver of silanated cover glass (Molecular Dimensions, catalog #MD406) was then placed on a glass slide on the stage, and a  $4.5\mu\text{L}$  drop of cell lysis solution was placed on the sliver with a Rainin P10 micropipette. The lysis solution contains  $2.5\mu\text{L}$  of reaction buffer (Clontech SMARTer Ultra Low RNA kit),  $1\mu\text{L}$  of 3 SMART CDS Primer IIA (Clontech) and  $1\mu\text{L}$  of spike-in quantification standards. The drop of lysis solution was visualized on the illuminated area of the stage, and the pipette tip containing the picked cell was lowered into it. Gentle pressure was applied to the syringe to ex-

Corresponding author: Barbara J. Wold. Biology Division, California Institute of Technology. Pasadena, CA 91125.

pel the cell from the pipette, and the tip was then lifted from the lysis solution. Visual confirmation was made at high power, while the cell dissolved in the lysis solution. The glass sliver was lifted from the stage using forceps, and placed in the bottom of a 200 $\mu$ L PCR tube. The tube was spun for 15 seconds at 10,000g, the sliver was removed, and the lysed cell was immediately frozen on dry ice. Twenty individual cells were collected in this way. We also collected two samples of ten cell pools into the same volume of lysis buffer, using the pipette picking method.

For  $\sim$ 100 cell pools, cells were first diluted in picking buffer to a concentration of 10 cells/ $\mu$ L. 10 $\mu$ L of the dilute cell suspension were added to 90 $\mu$ L of picking buffer in a 200 $\mu$ L PCR tube, and spun at 2500g for 90 seconds to pellet the cells. The tube was then mounted sideways in modeling clay on a glass slide, and the pellet was visualized under the phase contrast scope. A drawn glass pipette tip attached to the micromanipulator was advanced into the picking medium and the excess picking medium was withdrawn using the syringe. A 4.5 $\mu$ L aliquot of lysis buffer was then added to the cell pellet, and the lysate was spun and frozen as for the above samples.

After picking the individual and pooled cell samples, the remainder of the culture ( $\sim 2 \times 10^7$  cells) was spun down in two aliquots for 5 minutes at 1000g at 4 $^{\circ}$ C. The culture medium was removed, the pellet was rinsed with PBS, and re-spun as above. After the removal of PBS, both pellets were lysed with 1.2mL lysis buffer from the Ambion mirVana kit (catalog #AM1560). The lysates were then processed according to the manufacturer's protocol. After eluting total RNA from the columns, we performed a DNA digestion step to remove residual contaminating genomic DNA, using the DNA-free kit from Ambion (catalog #AM1907). After quality control with Qubit and the Agilent BioAnalyzer, the bulk prep total RNA was diluted to both 10ng/ $\mu$ L and 100pg/ $\mu$ L concentrations. We then added single microliter aliquots to the lysis buffer described above, and froze the samples for processing using the single cell protocol.

## First strand cDNA synthesis and amplification

The frozen samples were brought to the lab bench on dry ice. Lysis and denaturation were accomplished by heating the samples for 3 minutes at 72 $^{\circ}$ C. The samples were spun down and placed in a cooling rack at 4 $^{\circ}$ C. 5.5 $\mu$ L of first strand reaction buffer (Clontech) was then added (2 $\mu$ L of buffer, 1 $\mu$ L of RNase inhibitor, 1 $\mu$ L of dNTPs, 0.25 $\mu$ L of DTT, 1 $\mu$ L of SMARTer IIa oligos, and 1 $\mu$ L of SMARTScribe reverse transcriptase). The samples were reverse transcribed at 42 $^{\circ}$ C for 90 minutes and denatured at 70 $^{\circ}$ C for 10 minutes. After denaturation, the samples were spun down and 25 $\mu$ L of Ampure XP SPRI beads (Beckman Coulter genomics) were added. The samples

were incubated for 8 minutes at room temperature, then the beads were separated on a magnet for 5 minutes. The supernatant solution was removed with a pipette, and the beads were spun at 1000g for 1 minute to pellet. The sample was then placed back on the magnet, and excess supernatant was removed with a 10 $\mu$ L Rainin pipet tip. 50 $\mu$ L of amplification solution were then used to resuspend the beads (5 $\mu$ L of PCR buffer, 2 $\mu$ L of dNTPs, 2 $\mu$ L of amplification primers and 2 $\mu$ L of Advantage2 polymerase mix), and the samples were amplified under the following conditions: 1 minute at 95 $^{\circ}$ C, followed by cycles of 15 seconds at 95 $^{\circ}$ C, 30 seconds at 65 $^{\circ}$ C, 6 minutes at 68 $^{\circ}$ C, and final elongation for 10 minutes at 72 $^{\circ}$ C. Single cell and pool/split samples were amplified for 26 cycles, the 10 cell pools were amplified for 22 cycles, the 100 cell pools were amplified for 18 cycles, and the bulk prep RNA samples were amplified for 15 cycles. The amplified cDNA was spun down, and 90 $\mu$ L of Ampure XP beads were added. The beads were incubated with the amplified product for 8 minutes, then separated on a magnet for 5 minutes. The reaction solution was removed and the beads were washed twice with 200 $\mu$ L of freshly prepared 80% ethanol for 30 seconds. After the second ethanol wash, the beads were pelleted at 1000g for 1 minute, the residual ethanol was removed with a P10 Rainin pipette tip, and the beads were allowed to dry until the pellet showed signs of cracking. The beads were then resuspended in 20 $\mu$ L of 10mM Tris-HCl pH 8.5 for 10 minutes, and then separated on the magnet for 5 minutes. The supernatant containing the amplified cDNA was then withdrawn and 1 $\mu$ L was used for quantification with Qubit HS DNA reagents (Lifetech). An additional 1 $\mu$ L aliquot of the amplified sample was diluted to 3ng/ $\mu$ L, and then used for fragment length estimation on the Agilent BioAnalyzer using the HS cDNA kit.

Ten of the single cell samples were reverse transcribed and amplified as single cell aliquots. Ten were lysed and denatured, then pooled together and re-split to homogenize the mRNA populations in each (pool/split samples). The 10 and 100 cell pools were processed as the single cell aliquots, except they were amplified for 22 and 18 cycles each.

## Tagmentation

Tagmentation (Illumina/Nextera) uses a transposase mixture to simultaneously fragment and tag the ends of fragmented cDNA with amplification primers. 50ng aliquots of the SMART amplified cDNA were combined with tagmentation reagents according to the manufacturers protocol. After tagmentation, the reaction was cleaned up using 1.5 volumes of QG buffer (Qiagen) and 1.8 volumes of Ampure XP SPRI beads, according to the protocol of Gertz et al. 2012. The tagged cDNA was eluted from the beads in 20 $\mu$ L of Tris-HCl pH 8.5, and subjected to an additional 5 rounds of amplification, according to the manufacturers

protocol. The amplified and tagged cDNA was cleaned up using 0.8 volumes of SPRI beads, washed twice with 200 $\mu$ L of 80% ethanol, dried and eluted with 30 $\mu$ L of Tris-HCl pH 8.5.

The tagged libraries were quantified with Qubit HS DNA reagents, and 3ng from each sample were assayed on the Agilent BioAnalyzer using the HS cDNA kit. Libraries were judged to be acceptable if they showed a peak in the 300-400bp range. Library sequencing was performed on the HiSeq 2000 Illumina instrument. Single-end, 100bp reads were generated.

## Preparation of quantification standards

The quantification spike-in standards are designed to test a range of copy number concentrations over 3 factors of 10. We chose two size ranges ( $\sim$  300nt and  $\sim$  1400nt) to test the effect of transcript length on counting accuracy. The following transcripts were amplified from *Arabidopsis* total RNA for use as quantitation standards: VATG (376nt), OBF5 (1444nt), Apetala2 (1405nt), PDF (348nt), EPR (1451nt), AGP (323nt). These amplified cDNAs were cloned into a modified cloning vector containing the pBlue-script II promoters and multiple cloning site, flanking an elongated polyA sequence. The resulting clones were linearized downstream of the polyA sequence, so that in vitro transcription would result in the automatic inclusion of a polyA tail, without the need for polyA polymerase. In vitro transcription was performed using the EpiCentre Ampliscribe T3 in vitro transcription kit (catalog #AS3103). The reactions were cleaned up using a Qiagen RNA cleanup column (Qiagen catalog #74124). The transcribed products were quantified using Qubit RNA reagents (3 repeated measures) and then size verified on the Agilent BioAnalyzer using RNA Nano reagents. The transcripts were then diluted in diluent containing yeast tRNA as a carrier (Ambion Catalog #AM7119) and RNase inhibitor (Clontech catalog #2313A), and then combined into a cocktail for use as 1 $\mu$ L aliquots. The final concentrations for tRNA was 100pg/ $\mu$ L. The final concentrations of the spike-in standards are listed in Supplementary Table 2.

## *In silico* simulation of single-cell and cell pool transcriptomes

We aimed primarily to examine the effects of the levels of technical stochasticity and the amount of input, but also tried to approximate what a real population of cells might look like, with all the variation of gene expression on the single-cell level that exists in it. To this end, we used the following model.

Let  $|S|$  be the number of cells pooled, and  $p_{E_g}$  be the probability that a gene  $g$  belonging to the set of polyadenylated genes  $G$  is expressed in any given cell  $S_i \in S$ . There likely exist a group of housekeeping genes for which

$p_{E_g} \approx 1$ , and then there is a continuum of genes for which  $p_{E_g} < 1$ . Finally, there likely exist genes that are present only in a small fraction of cells for which  $p_{E_g} \ll 1$ . We denote with  $T$  the total number of mRNA molecules expressed in each cell  $S_i$ , with  $C_{C_g}$  the true number of transcript copies per cell for each gene  $g \in G$ , where  $G$  is the set of all genes. By definition,  $T = \sum_{g \in G} C_{C_g}$ . For simplicity, we assume it is constant for each cell.

We derive FPKM estimates  $FPKM_g$  for each gene based on bulk RNA-seq measurements. For simplicity, and since this does not in any way affect the conclusions of the simulations, we assume that the ratios of FPKM values between genes are equal to the ratios between their absolute number of transcript molecules in the very large cell pool from which the library was built. We then derive an estimate for the average value of  $C_{C_g}$  when a gene is expressed in a given cell as follows:

$$C_{C_g} = \frac{E_g * FPKM_g}{\sum_{g \in G} E_g * FPKM_g} * T \quad (1)$$

where we account for the fact that only a portion of cells express the gene by setting  $E_g = 1$  when a gene is expressed in a given cell, and  $E_g = 0$  when it is not ( $E_g$  is set based on the probability  $p_{E_g}$ , as described further below).

Finally, we define the single-molecule capture efficiency  $p_{smc}$  as the probability that any given RNA molecule in a cell will be converted into cDNA, amplified and eventually present in the sequencing library.

We use the following algorithm for generating *in silico* cell pool transcriptomes and then the FPKM values in the corresponding libraries. We denote the number of original transcript copies present in the final library (after the effects of technical stochasticity have been modeled) with  $C_{L_g}$

---

### Algorithm 1 Cell pool RNA-seq simulation

---

```

for  $g \in G$  do
   $C_{L_g} \leftarrow 0$ 
end for
for  $i = 1 \rightarrow |S|$  do
  for  $g \in G$  do
     $p \leftarrow$  random number  $\in [0, 1]$ 
    if  $p \leq p_{E_g}$  then
       $E_g \leftarrow 1$ 
    else
       $E_g \leftarrow 0$ 
    end if
  end for
  for  $g \in G$  do
     $C_{C_g} \leftarrow \frac{E_g * FPKM_g}{\sum_{g \in G} E_g * FPKM_g} * T$ 
  end for

```

```

for  $i = 1 \rightarrow C_{C_g}$  do
   $p \leftarrow$  random number  $\in [0, 1]$ 
  if  $p \leq p_{smc}$  then
     $C_{L_g} = C_{L_g} + 1$ 
  end if
end for
end for
end for
for  $g \in G$  do
  1.  $FPKM_{L_g} \leftarrow \frac{C_{L_g}}{\sum_{g \in G} C_{L_g}} \sum_{g \in G} FPKM_g$ 
  2.  $FPKM_{C_g} \leftarrow \frac{C_{C_g}}{\sum_{g \in G} C_{C_g}} \sum_{g \in G} FPKM_g$ 
  3. compare  $FPKM_{L_g}$  with  $FPKM_{C_g}$ 
end for

```

In practice, we have no reliable estimates of what the distribution of  $p_{E_g}$  might be across the whole transcriptome (this in itself is a major open research question). We assigned  $p_{E_g}$  values to genes by first splitting all genes expressed at  $FPKM \geq 1$  in 10 percentile groups in order of increased expression:  $PG \in \{0.1, 0.2, 0.3, 0.4, 0.5, 0.6, 0.7, 0.8, 0.9, 1\}$ . For each expression percentile group  $PG$  we modeled the distribution of the  $p_{E_g}$  values with the normalized Gaussian density  $\mathcal{N}(\mu, \sigma)$  over the interval  $[F, 1]$  where  $\mu = PG$  and  $\sigma = |0.9 - PG|$ , and  $F$  is the minimal fraction of cells a gene can be expressed in (which we set to 0.01).

## Sequence alignment and gene expression quantification

Reads were aligned against a combined Bowtie (Langmead et al. 2009) index of the NCBI GRCh37 (hg19) version of the human genome (downloaded from UCSC) excluding the Y chromosome (as GM12878 cells are of female origin) and random chromosomes and the spike-in sequences using TopHat version 1.4.1 (Trapnell et al. 2009; Trapnell et al. 2012) and the GENCODE V13 annotation (Harrow et al. 2012) with the "--GTF" option. Read mapping statistics are available in Supplementary Table 1. Gene expression was quantified using Cufflinks version 2.0.2 (Trapnell et al. 2010; Trapnell et al. 2012) for both the GENCODE V13 and refSeq annotations. FPKMs were converted to estimates for copies-per-cell numbers using spike-in sequences of known abundance (Supplementary Table 2); FPKMs were calculated for the spike-ins and used to create a calibration curve for each library (forcing the regression through 0 to avoid the assignment of positive copies per cell to genes with 0 FPKMs) on the basis of which and the Cufflinks FPKMs copies-per-cell estimates were derived for each gene.

## Single-molecule capture efficiency estimation

We estimated the average single-molecule capture efficiency based on the number of libraries with 0 FPKM for each spike and the number of input molecules at which that spike was present in the reaction. The actual single-molecule capture efficiency need not be exactly the same for all libraries. It is a binomial process, but it is not possible to estimate it precisely by directly modeling the outcome with a binomial distribution as only the number of complete failures (libraries with 0 FPKM for a given spike, in which all  $C_s$  trials where  $C_s$  is the number of input copies for spike  $s$ ) is known. The number of successes (and the corresponding exact number of failures) is not known because multiple copies of each spike are used as input, and as a result, in a library with a non-zero FPKM it is only known that some copies were successfully captured but not how many exactly. We derived an approximate estimate for the single-molecule capture efficiency by treating individual libraries as single trials in a binomial process, then dividing the estimated single-molecule capture efficiency by the number of input copies:

$$p_{smc} = \frac{1}{C_s} \arg \max_p \mathcal{L}(p|L_0 + L_1, L_1) \quad (2)$$

Where  $L_0$  is the number of libraries with 0 FPKM and  $L_1$  is the number of libraries with non-zero FPKM for the spike. This is a relatively crude way to estimate  $p_{smc}$  and it works well only when its value is small but in practice the  $p_{smc}$  value is indeed small.

For the AGP23 spike (spiked-in at 5 copies), the estimated single-molecule capture efficiency was 0.138 (95% confidence interval 0.106 to 0.164); for the EPR1 spike (10 copies), the estimated single-molecule capture efficiency was 0.053 (95% confidence interval 0.037 to 0.068), and for the PDF1 spike (20 copies), it was 0.045 (95% confidence interval 0.038 to 0.048). As these are approximate estimates, for simplicity we used an average single-molecule capture efficiency  $p_{smc} = 0.10$  in subsequent calculations.

## Analysis of allele-biased expression

The diploid (May 2011 release) NA12878 genome containing phased SNPs and indels based on the NCBI build 36 (hg18) version of the human genome was downloaded from [http://sv.gersteinlab.org/NA12878\\_diploid/](http://sv.gersteinlab.org/NA12878_diploid/). Coordinates for the refSeq annotation for hg18 (downloaded from the UCSC genome browser) were converted into paternal and maternal coordinates. Heterozygous transcriptomes containing two copies of each transcript were built and reads were aligned using Bowtie (Langmead et al. 2009) (version 0.12.7) with the following settings: "-v 0 -a --best --strata", i.e. with no mismatches allowed. Reads were assigned to an allele if they mapped

only to one of the alleles of a gene. All identical reads were collapsed into a single count in order to eliminate PCR amplification artifacts. Allele-biased expression was assessed as follows. First, for each gene using the total number of allele-specific reads for each allele (over all heterozygous positions), a binomial test with a uniform read distribution expectation, a 0.05 p-value cutoff, and a Bonferroni multiple-hypothesis testing correction where the correction factor is the number of genes with sufficiently many allele-specific reads for the binomial test to pass the specified p-value in the case of complete dominance of one of the alleles. Second, the number of copies for each gene was used to derive an estimate for the absolute number of copies per cell for each allele, i.e., for alleles  $A$  and  $a$  and a per-cell copies estimate for the gene  $C_E$ :

$$C_{E_A} = \frac{N_{reads}(A)}{N_{reads}(A) + N_{reads}(a)} C_E \quad (3)$$

Another binomial test similar to the one described above was then run using the  $C_{E_A}$  and  $C_{E_a}$  estimates.

As it is possible that only a small number of reads map differentially to the two alleles of a gene (due, for example, to heterozygous positions being located in a region of poor sequencing coverage) while the gene itself is expressed highly, thus resulting in a significant binomial test using the copies-per-cell estimates that is, however, poorly supported on the read level, both tests were required to pass statistical significance for an allele bias call to be made.

Finally, due to the imperfect single-molecule capture efficiency of the single-cell RNA-seq library building process, it is possible that apparent allele biases are the result of purely stochastic differences between the capture efficiency for the two alleles in a given library. For this reason, we applied a third filter for allele-biased expression calls, which required that the probability of obtaining apparently statistically significant differences in the estimated copies per cell for the two alleles  $C_{E_A}$  and  $C_{E_a}$  by chance from two independent binomial process with the estimated single-molecule capture efficiency  $p_{smc}$  is low ( $p \leq 0.05$  after applying Bonferroni multiple hypothesis testing correction):

$$p = \sum_{C_E}^{C_C} \frac{NB(C_C - C_E, p_{smc})}{\sum_{C_E}^{C_C} NB(C_C - C_E, p_{smc})} \sum_0^{C_{E_a}} B(C_{C_a}, p_{smc}) \sum_{C_{E_A}}^{C_A} B(C_{C_A}, p_{smc}) \quad (4)$$

Where  $C_C = 2 * C_{C_a} = 2 * C_{C_A}$  refer to the actual number of copies per cell (as opposed to the estimated number of copies  $C_E = C_{E_a} + C_{E_A}$ ),  $NB(C_C - C_E, p_{smc})$  refers to

the negative binomial probability that the actual number of copies is  $C_C$  given the estimated number of copies  $C_E$ :

$$NB(C_C - C_E, p_{smc}) = \binom{C_E + (C_C - C_E) - 1}{C_E - 1} p_C^{C_E} (1 - p_{smc})^{C_C - C_E}$$

and the binomial probabilities  $B(C_{C_A}, p_{smc})$  and  $B(C_{C_a}, p_c)$  are defined as:

$$B(C_{C_A}, p_{smc}) = \binom{C_{C_A}}{C_{E_A}} p_{smc}^{C_{E_A}} (1 - p_{smc})^{C_{C_A} - C_{E_A}}$$

and

$$B(C_{C_a}, p_{smc}) = \binom{C_{C_a}}{C_{E_a}} p_{smc}^{C_{E_a}} (1 - p_{smc})^{C_{C_a} - C_{E_a}}$$

The probability was evaluated for possible values of the actual number of copies per cell up to  $C_C = \min(5000, 100 * C_E)$ .

Genes on the X chromosome were excluded from all analysis as the GM18278 cell line is female. The inactivation of the X chromosome leading to a corresponding allelic exclusion was observed as expected (data not shown).

## Alternative splicing analysis

We mapped reads using TopHat with *de novo* junction discovery turned on; such alignments are in principle suited for the discovery and analysis of novel splice junctions, a large number of which has been recently reported by the ENCODE consortium (Djebali & Davis et al. 2012). An important step in such analysis is distinguishing between true novel splice junctions on one hand and mapping and

library-building artifacts on the other. Such artifacts certainly exist as we observe “novel junctions” in our spike-in quantification standards, which are not spliced (Supplementary Table 5). Confidence in the reality of newly discovered splice junctions in traditional RNA-seq is boosted by the number of distinct sequencing fragments supporting them, and by replication in other libraries. However, the former line of evidence is not applicable to single-cell RNA-seq due to the one-to-many relationship between original founder RNA molecules and sequencing fragments in the final library, while the latter is difficult to apply in all cases given the uniqueness of each individual single cell. For these reasons, we restricted alternative splicing analysis to known splice junctions and novel junctions, at least one end of which was annotated as splice site in GENCODE V13.

We calculated 5’ and 3’ splicing inclusion  $\psi$  scores as follows (Pervouchine et al. 2013):

$$\psi_5(D, A) = \frac{N_{reads}(D, A)}{\sum_{A_i \in A} N_{reads}(D, A_i)} \quad (5)$$

$$\psi_3(D, A) = \frac{N_{reads}(D, A)}{\sum_{D_i \in D} N_{reads}(D_i, A)} \quad (6)$$

Where  $D$  and  $A$  refer to the donor and acceptor splice sites, respectively, and the number of reads  $N_{reads}$  refers to the number of spliced reads crossing a splice or donor sites after apparent PCR duplicates have been collapsed into a single count. We note that any given donor or acceptor splice site need not be included in all transcripts expressed from the gene it belongs to. Since isoform-level quantification is not a completely solved problem and it is even less clear what its relative stability is for single-cell RNA-seq compared to the bulk RNA datasets for which algorithms have been designed, we only included alternative splice sites for which the donor or acceptor site was found in all annotated transcripts for the gene (GENCODE V13 annotation) as well as novel junctions (compared to the GENCODE V13 annotation) derived from the TopHat

mappings involving such splice sites. This allows us to use gene-level FPKM estimates, which are in general more reliable than isoform-level ones, and the mRNA copies-per-cell estimates based on those to derive the approximate absolute number of transcripts containing a given splice junction in each. The statistical significance of bias towards one of the sites was assessed analogously to the approach described for allele-biased expression above, with one significant modification: in cases of more than two possible  $A_i$  acceptor sites, for a donor site  $D$  or  $D_i$  sites for an acceptor site  $A$ , the major pair (the one with the most reads) was compared to the sum of reads for all other pairs as if those pairs constituted as single pair. This approach was adopted so that a maximum number of alternative splicing events are included in the analysis and with a focus on identifying cases of robust and statistically significant splice site use switches between individual single cells. When the major  $(D, A)$  pair did not have more than half of all reads, the site was excluded from further analysis.

## Gene expression clustering and weighted correlation network analysis

Weighted correlation networks (Zhang & Horvath 2005) were constructed from the single-cell vectors of estimated mRNA copies using the WGCNA R package (Langfelder & Horvath 2008) using the `blockwiseModules` function with  $\beta = 6$  (Supplementary Figure 34) and a minimum module size of 10 genes. Input genes were filtered as follows: first, we required that genes be expressed at more than one estimated copy per cell  $C_E$  in at least one cell; second, we required that the ratio between the  $C_E$  variance in single cells and the  $C_E$  variance in pool/split libraries be more than 1.5. The latter requirement was imposed in order to minimize the identification of apparently coexpressed gene modules due to purely stochastic differences in transcript capture (see Supplementary Figure 33 for more detail).

Gene Ontology enrichment in modules was assessed using FuncAssociate2.0 (Berriz et al. 2009). Gene expression clustering was carried out using Cluster 3.0 (de Hoon et al. 2004) and visualized using TreeView (Saldanha 2004).

# Supplementary Figures

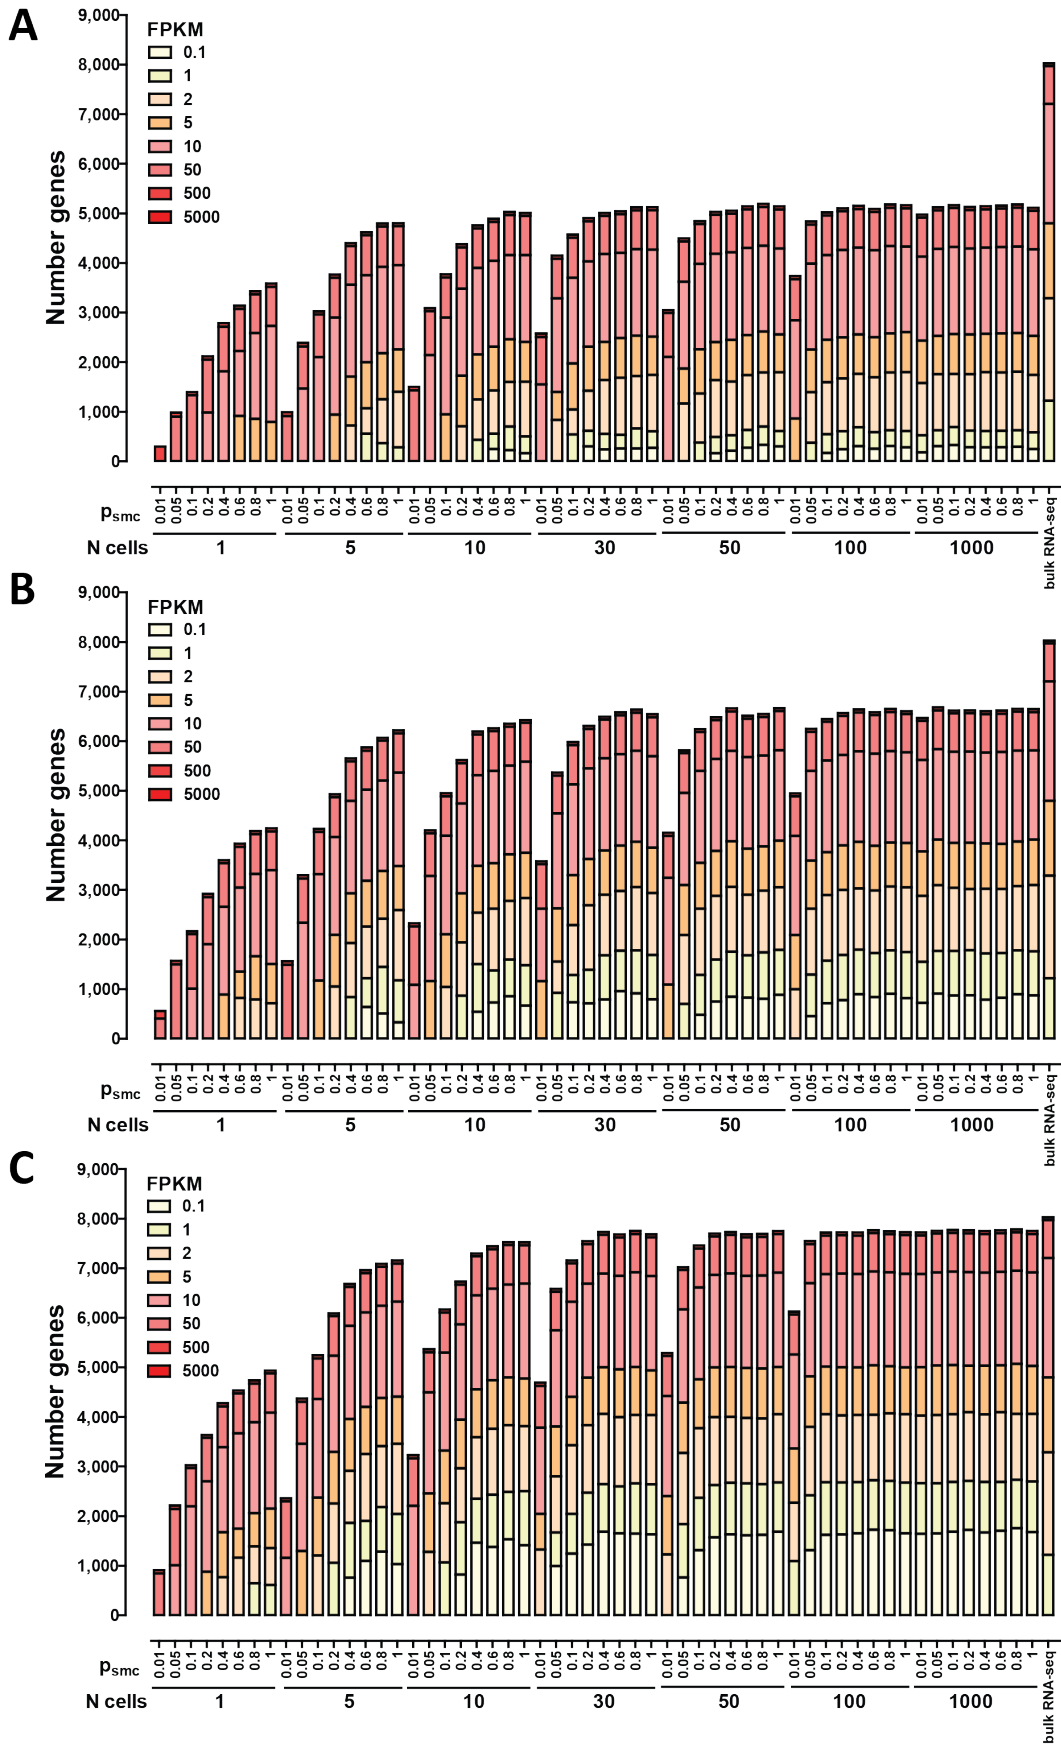

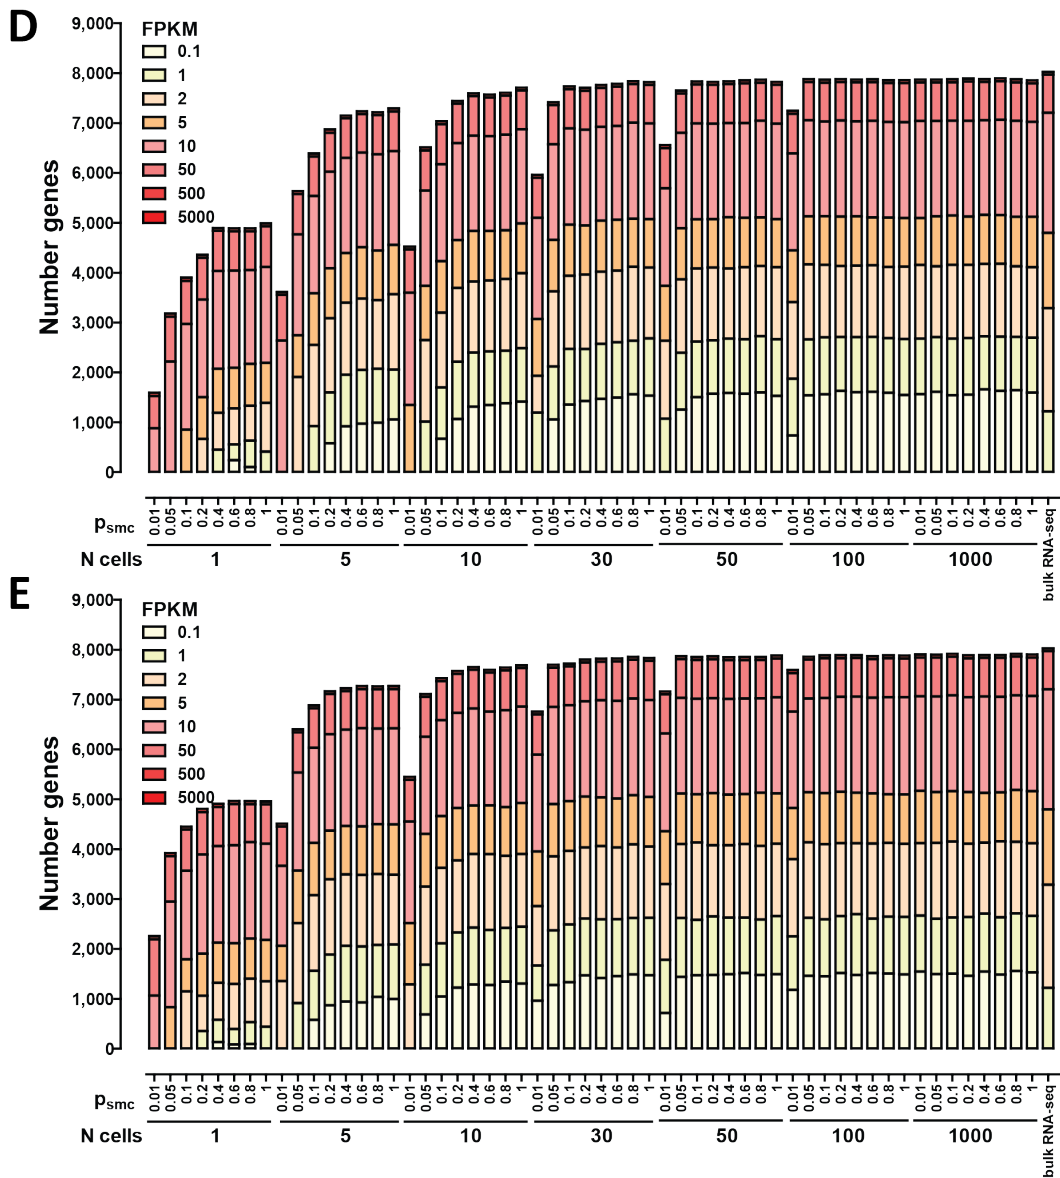

**Supplementary Figure 1: Detection of expressed genes in simulated datasets as a function of the single molecule capture efficiency, the number of cells and the average number of transcripts per cell. (A) Average of 50,000 mRNAs per cell. (B) Average of 100,000 mRNAs per cell. (C) Average of 200,000 mRNAs per cell. (D) Average of 500,000 mRNAs per cell. (E) Average of 1,000,000 mRNAs per cell. See the Methods section for full details on how the simulation was carried out.**



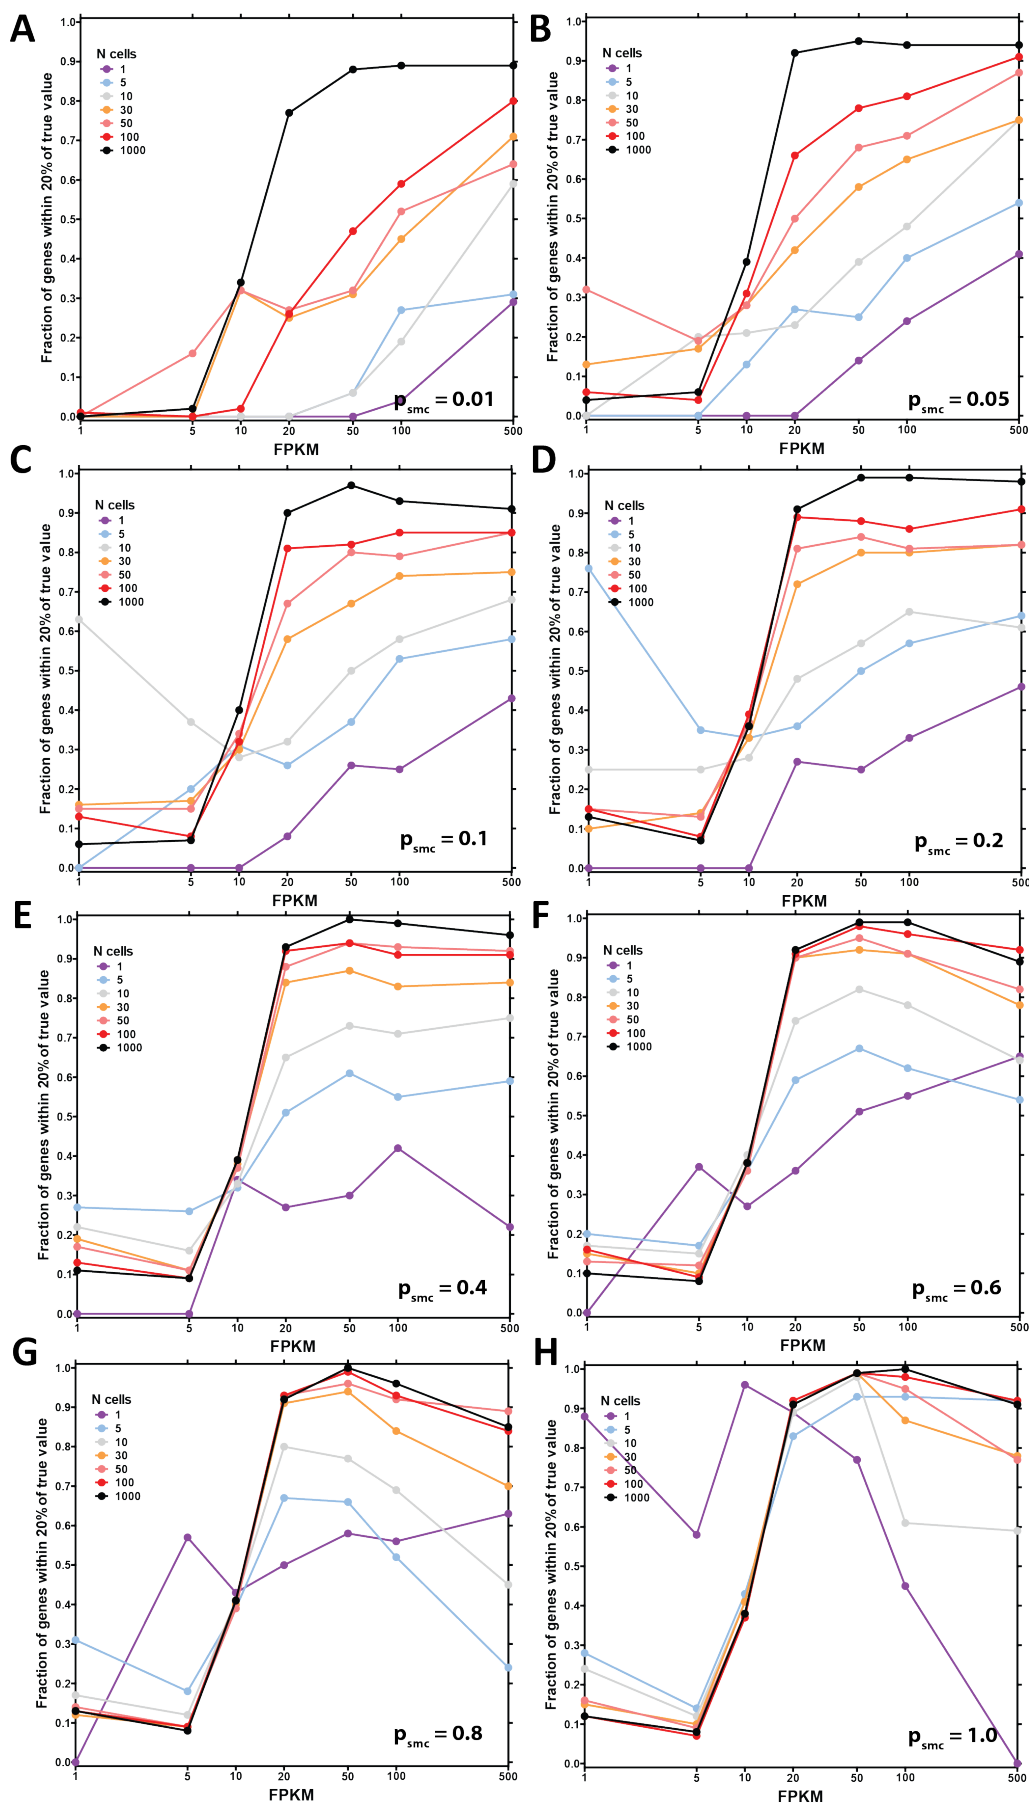

**Supplementary Figure 2: Accuracy of estimation of population-level gene abundance as a function of the number of cells pooled and the single molecule capture probability.** Average of 50,000 mRNAs per cell. Shown is the fraction of genes at the indicated expression levels in FPKM in a bulk RNA-seq dataset, whose estimated expression level in FPKM in simulated libraries was within 20% of their true value after stochasticity due to the probability of capture of cells that express them and the single-molecule capture efficiency of the library-building protocol have been modeled. See the Methods section for full details on how the simulation was carried out.

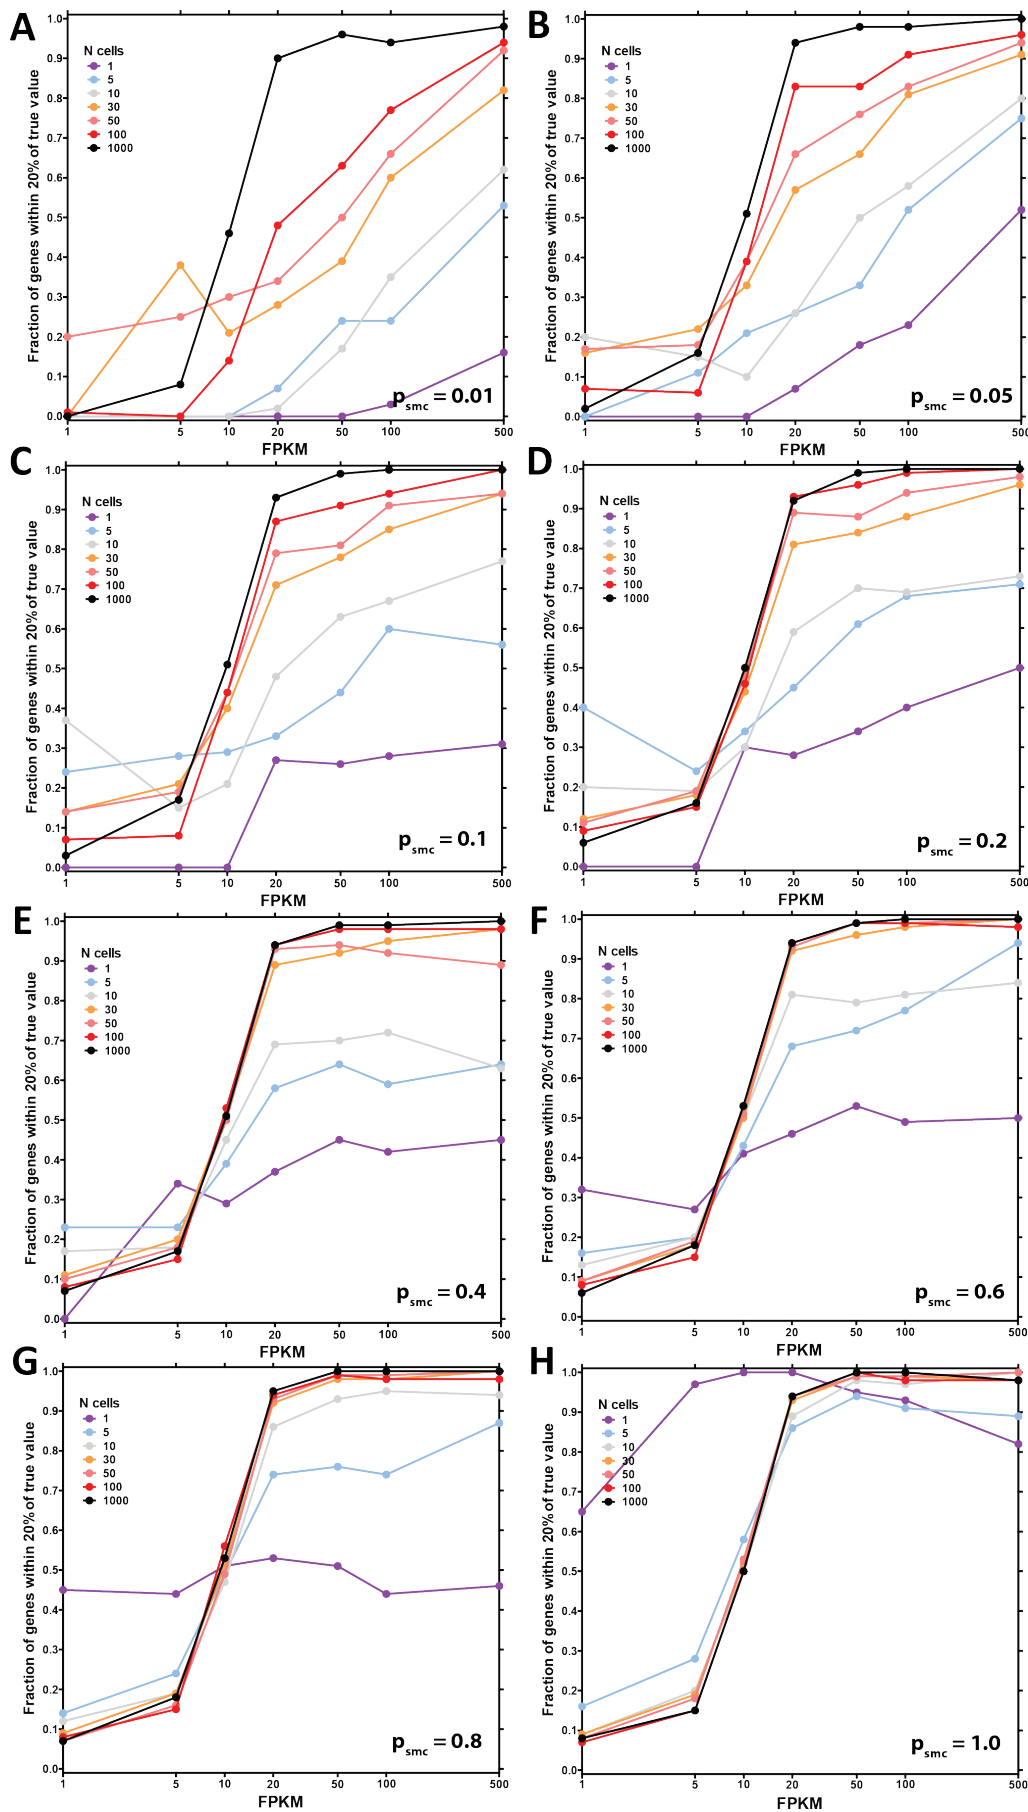

**Supplementary Figure 3: Accuracy of estimation of population-level gene abundance as a function of the number of cells pooled and the single molecule capture probability.** Average of 100,000 mRNAs per cell. Shown is the fraction of genes at the indicated expression levels in FPKM in a bulk RNA-seq dataset, whose estimated expression level in FPKM in simulated libraries was within 20% of their true value after stochasticity due to the probability of capture of cells that express them and the single-molecule capture efficiency of the library-building protocol have been modeled. See the Methods section for full details on how the simulation was carried out.

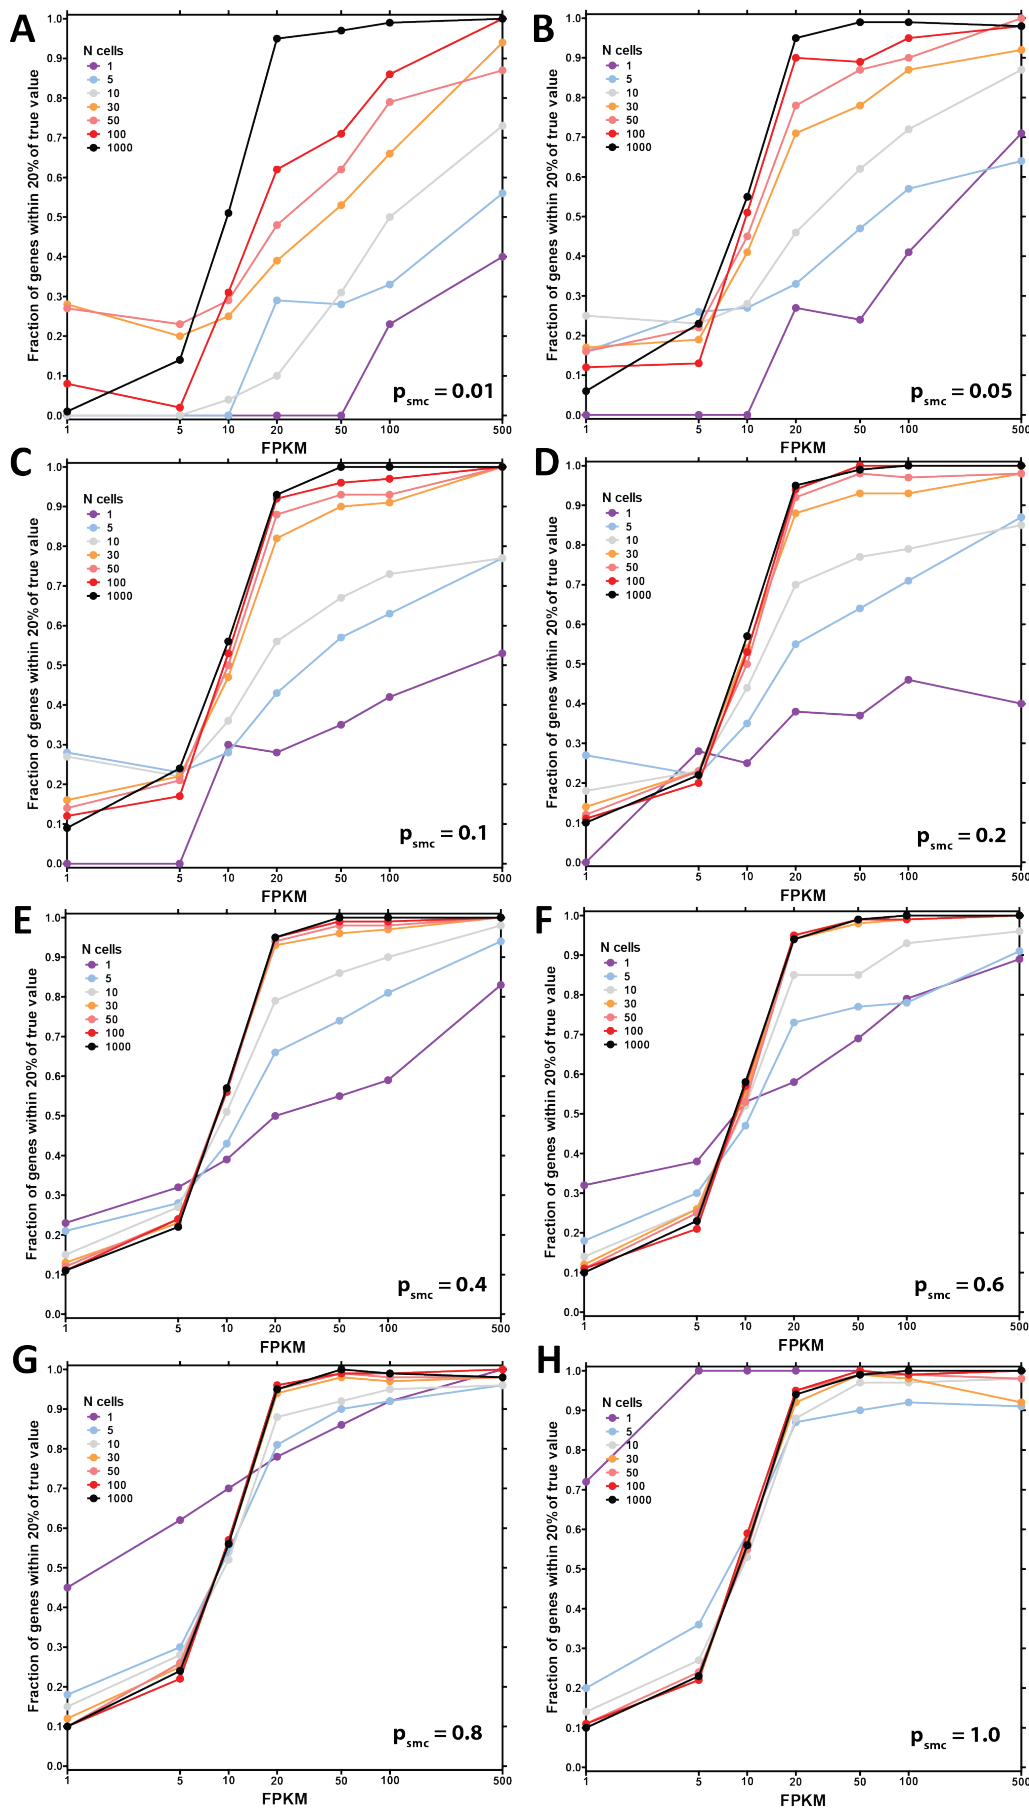

Supplementary Figure 4: Accuracy of estimation of population-level gene abundance as a function of the number of cells pooled and the single molecule capture probability. Average of 200,000 mRNAs per cell. Shown is the fraction of genes at the indicated expression levels in FPKM in a bulk RNA-seq dataset, whose estimated expression level in FPKM in simulated libraries was within 20% of their true value after stochasticity due to the probability of capture of cells that express them and the single-molecule capture efficiency of the library-building protocol have been modeled. See the Methods section for full details on how the simulation was carried out.

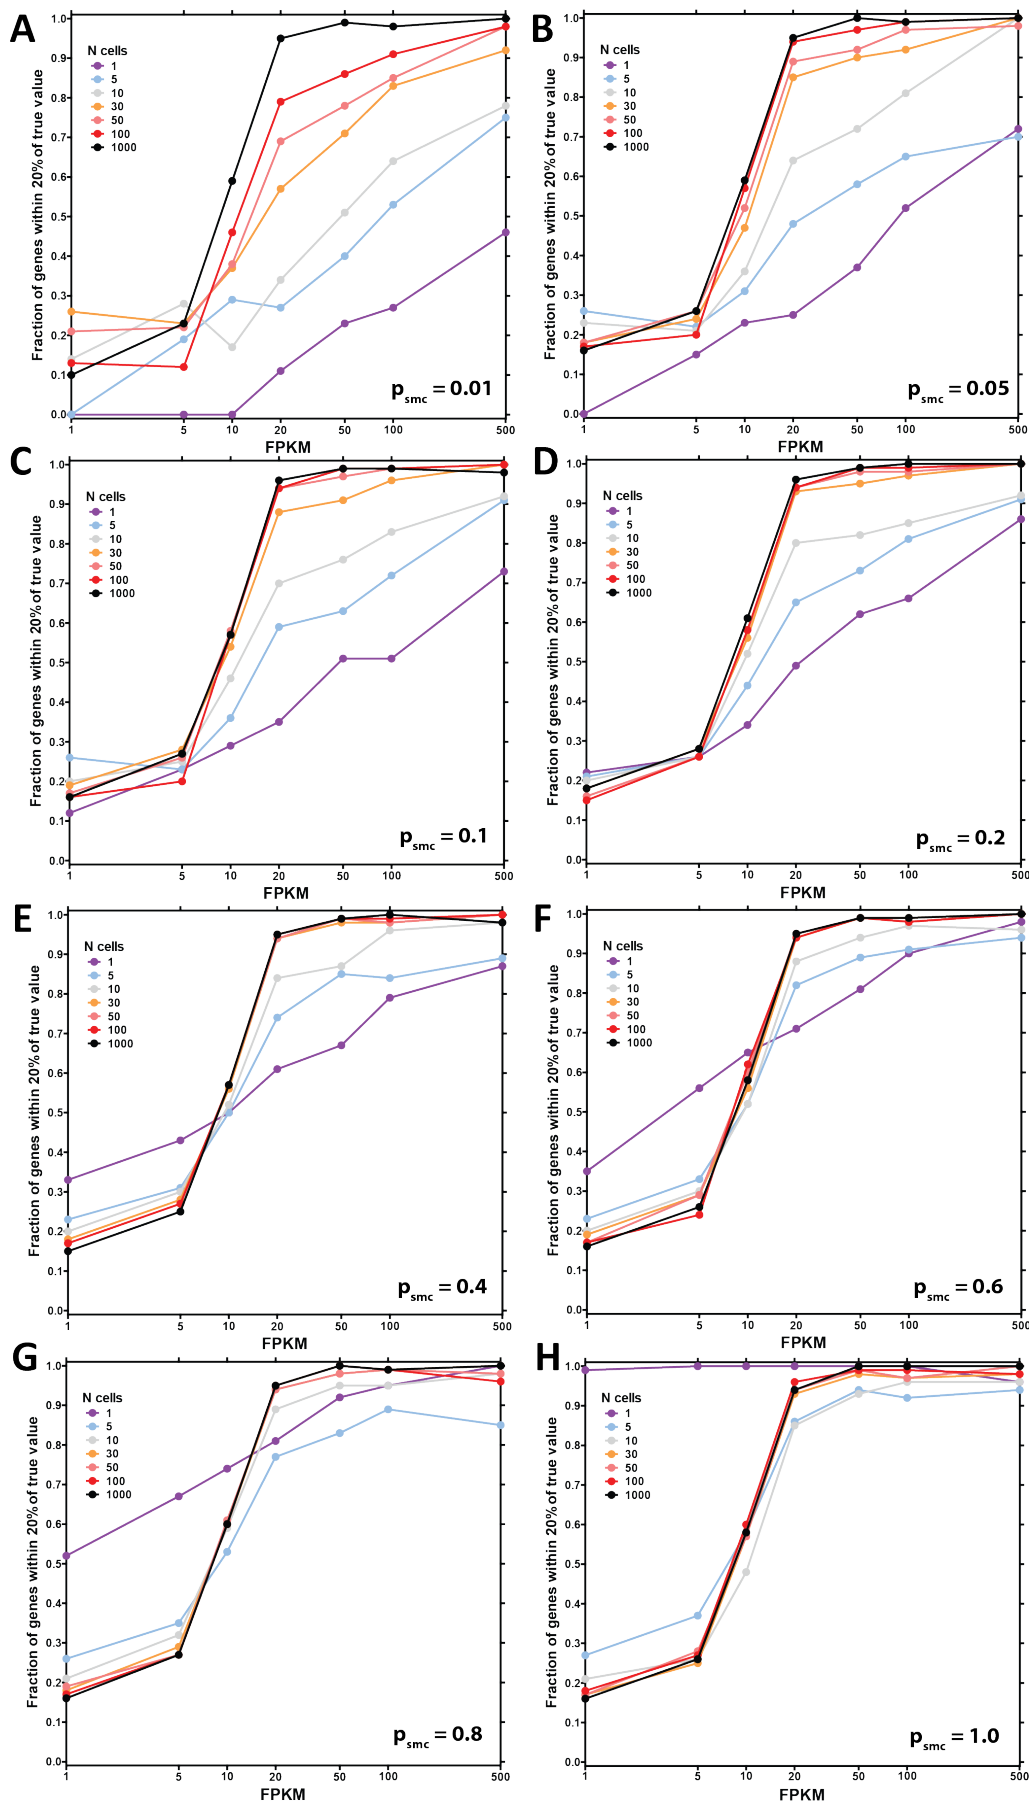

**Supplementary Figure 5: Accuracy of estimation of population-level gene abundance as a function of the number of cells pooled and the single molecule capture probability.** Average of 500,000 mRNAs per cell. Shown is the fraction of genes at the indicated expression levels in FPKM in a bulk RNA-seq dataset, whose estimated expression level in FPKM in simulated libraries was within 20% of their true value after stochasticity due to the probability of capture of cells that express them and the single-molecule capture efficiency of the library-building protocol have been modeled. See the Methods section for full details on how the simulation was carried out.

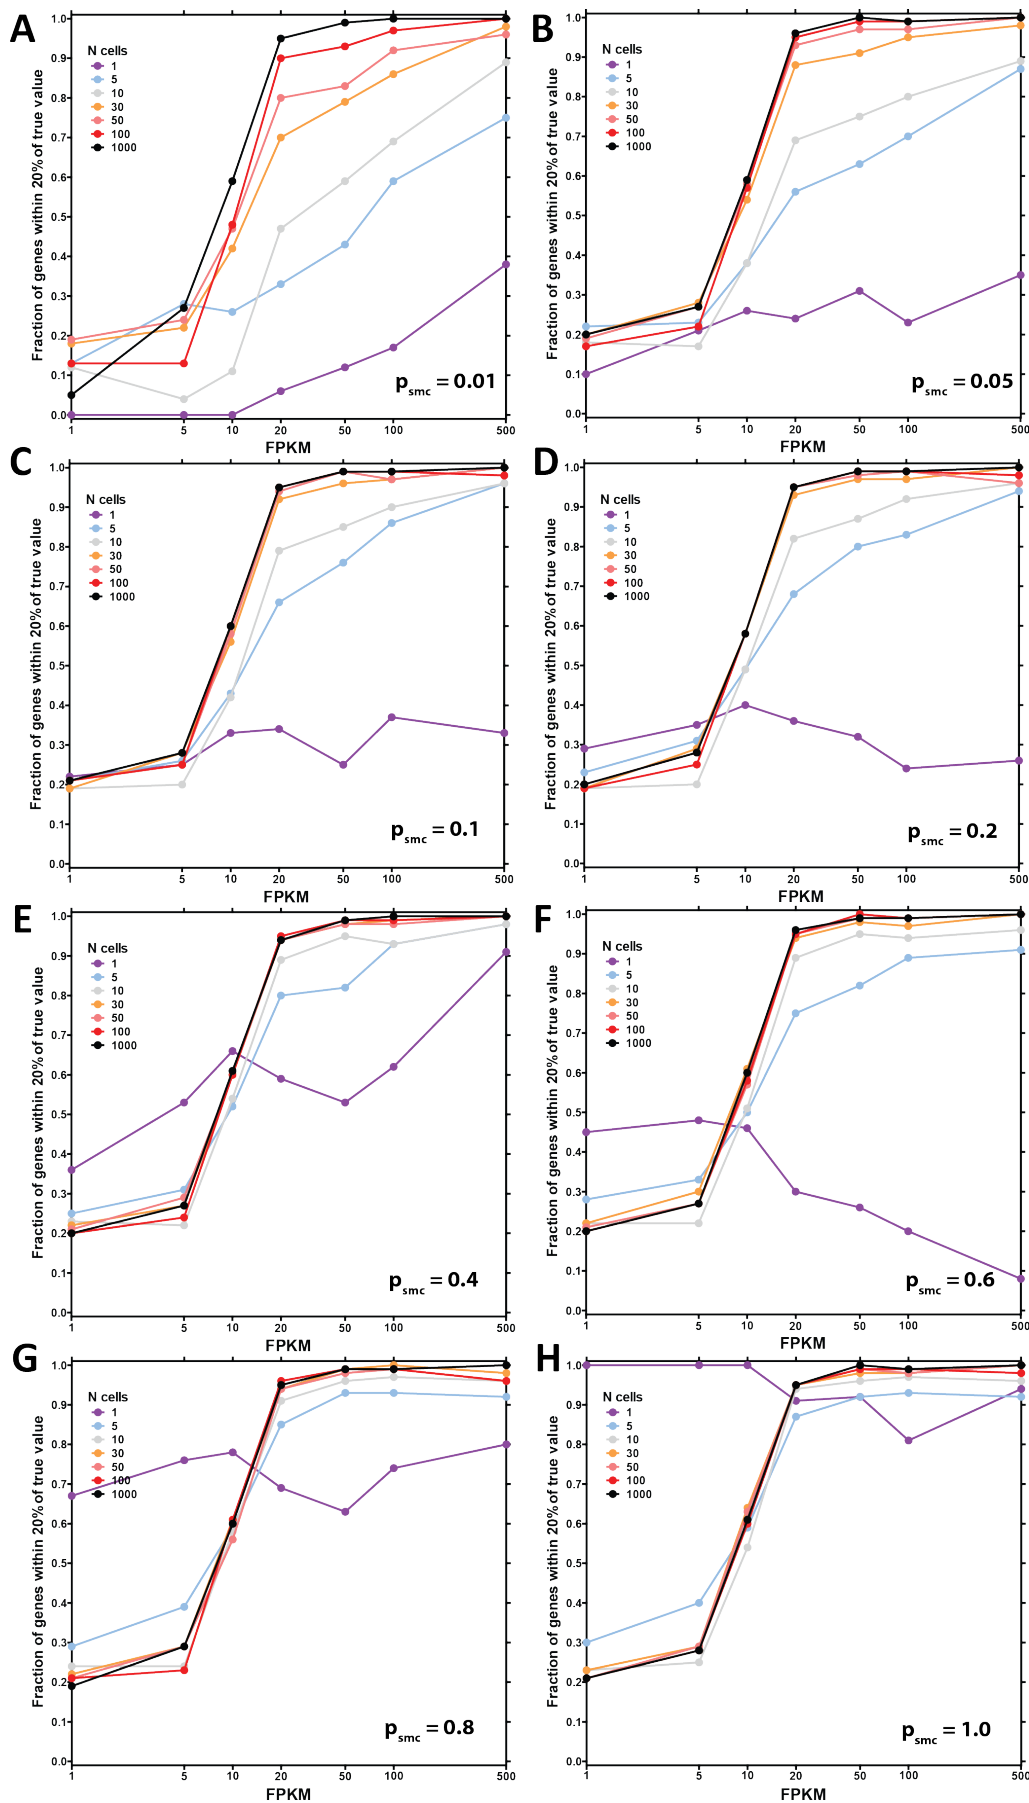

**Supplementary Figure 6:** Accuracy of estimation of population-level gene abundance as a function of the number of cells pooled and the single molecule capture probability. Average of 1,000,000 mRNAs per cell. Shown is the fraction of genes at the indicated expression levels in FPKM in a bulk RNA-seq dataset, whose estimated expression level in FPKM in simulated libraries was within 20% of their true value after stochasticity due to the probability of capture of cells that express them and the single-molecule capture efficiency of the library-building protocol have been modeled. See the Methods section for full details on how the simulation was carried out.

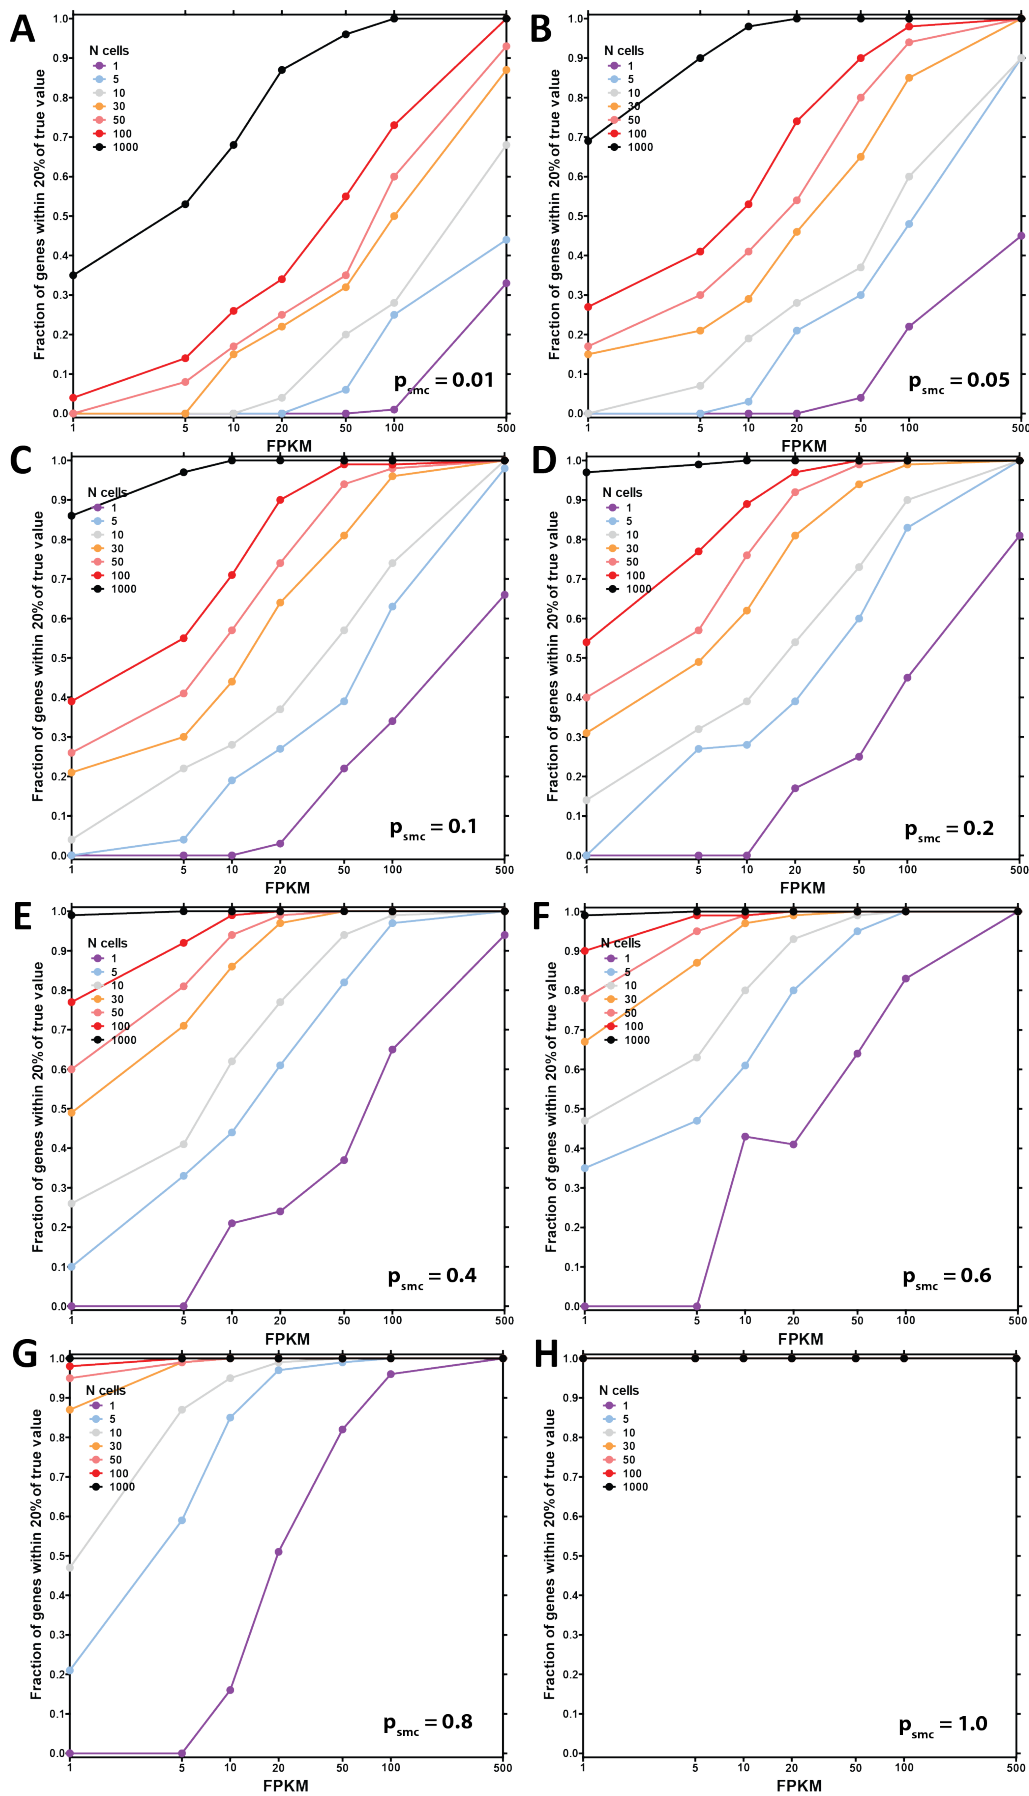

**Supplementary Figure 7: Accuracy of estimation of gene abundance within a cell pool as a function of the number of cells pooled and the single molecule capture probability.** Average of 50,000 mRNAs per cell. Shown is the fraction of genes at the indicated expression levels in FPKM in a bulk RNA-seq dataset, whose estimated expression level in FPKM in simulated libraries was within 20% of their true value after stochasticity due to the probability of capture of cells that express them and the single-molecule capture efficiency of the library-building protocol have been modeled. See the Methods section for full details on how the simulation was carried out.

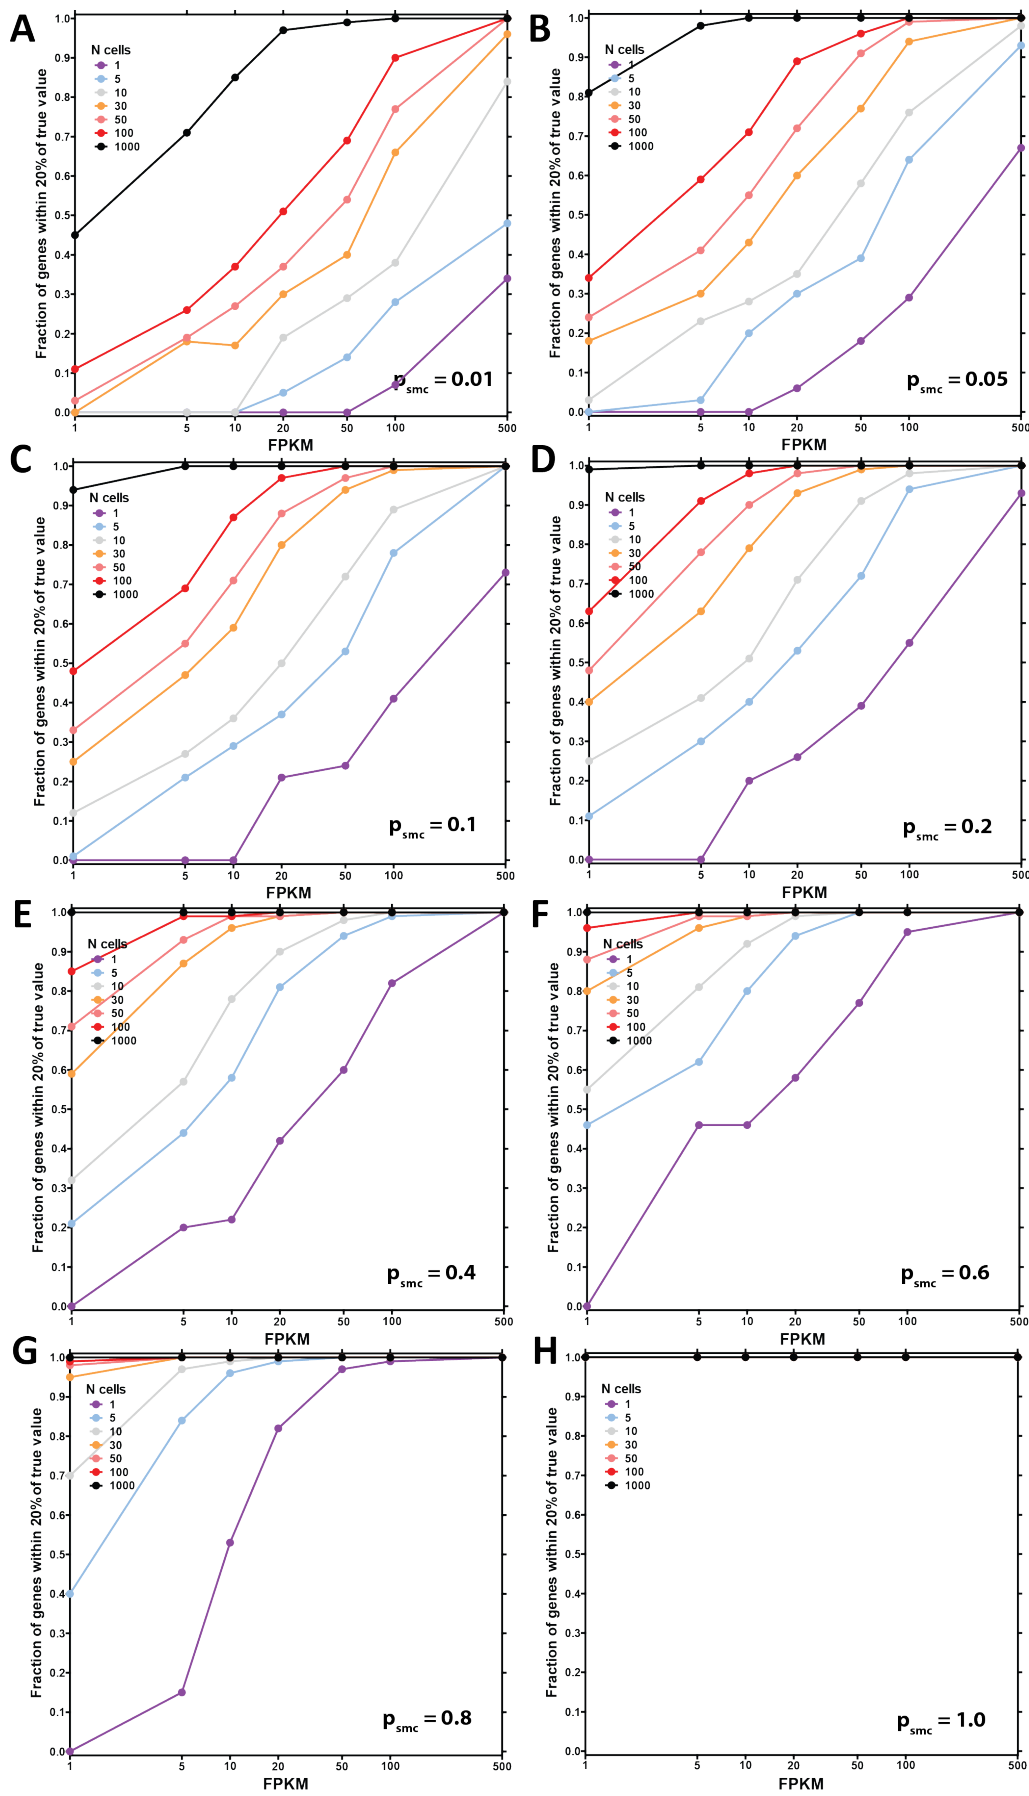

**Supplementary Figure 8: Accuracy of estimation of gene abundance within a cell pool as a function of the number of cells pooled and the single molecule capture probability.** Average of 100,000 mRNAs per cell. Shown is the fraction of genes at the indicated expression levels in FPKM in a bulk RNA-seq dataset, whose estimated expression level in FPKM in simulated libraries was within 20% of their true value after stochasticity due to the probability of capture of cells that express them and the single-molecule capture efficiency of the library-building protocol have been modeled. See the Methods section for full details on how the simulation was carried out.

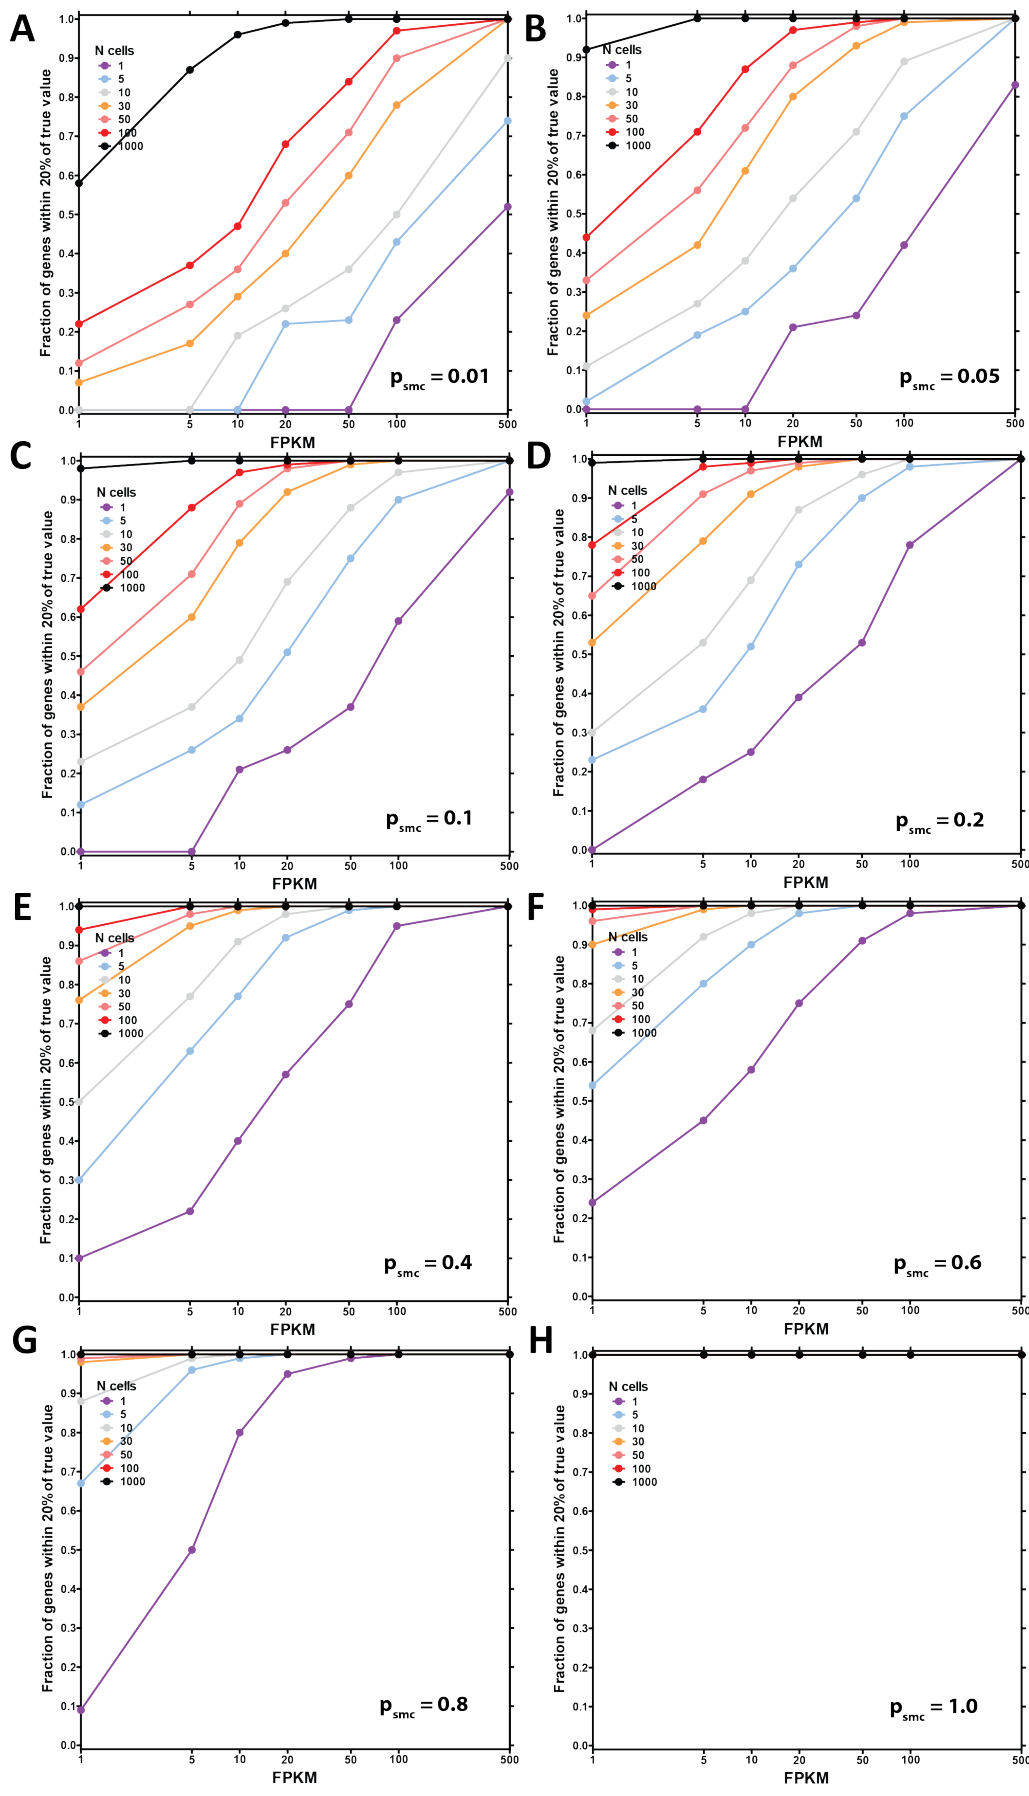

**Supplementary Figure 9: Accuracy of estimation of gene abundance within a cell pool as a function of the number of cells pooled and the single molecule capture probability.** Average of 200,000 mRNAs per cell. Shown is the fraction of genes at the indicated expression levels in FPKM in a bulk RNA-seq dataset, whose estimated expression level in FPKM in simulated libraries was within 20% of their true value after stochasticity due to the probability of capture of cells that express them and the single-molecule capture efficiency of the library-building protocol have been modeled. See the Methods section for full details on how the simulation was carried out.



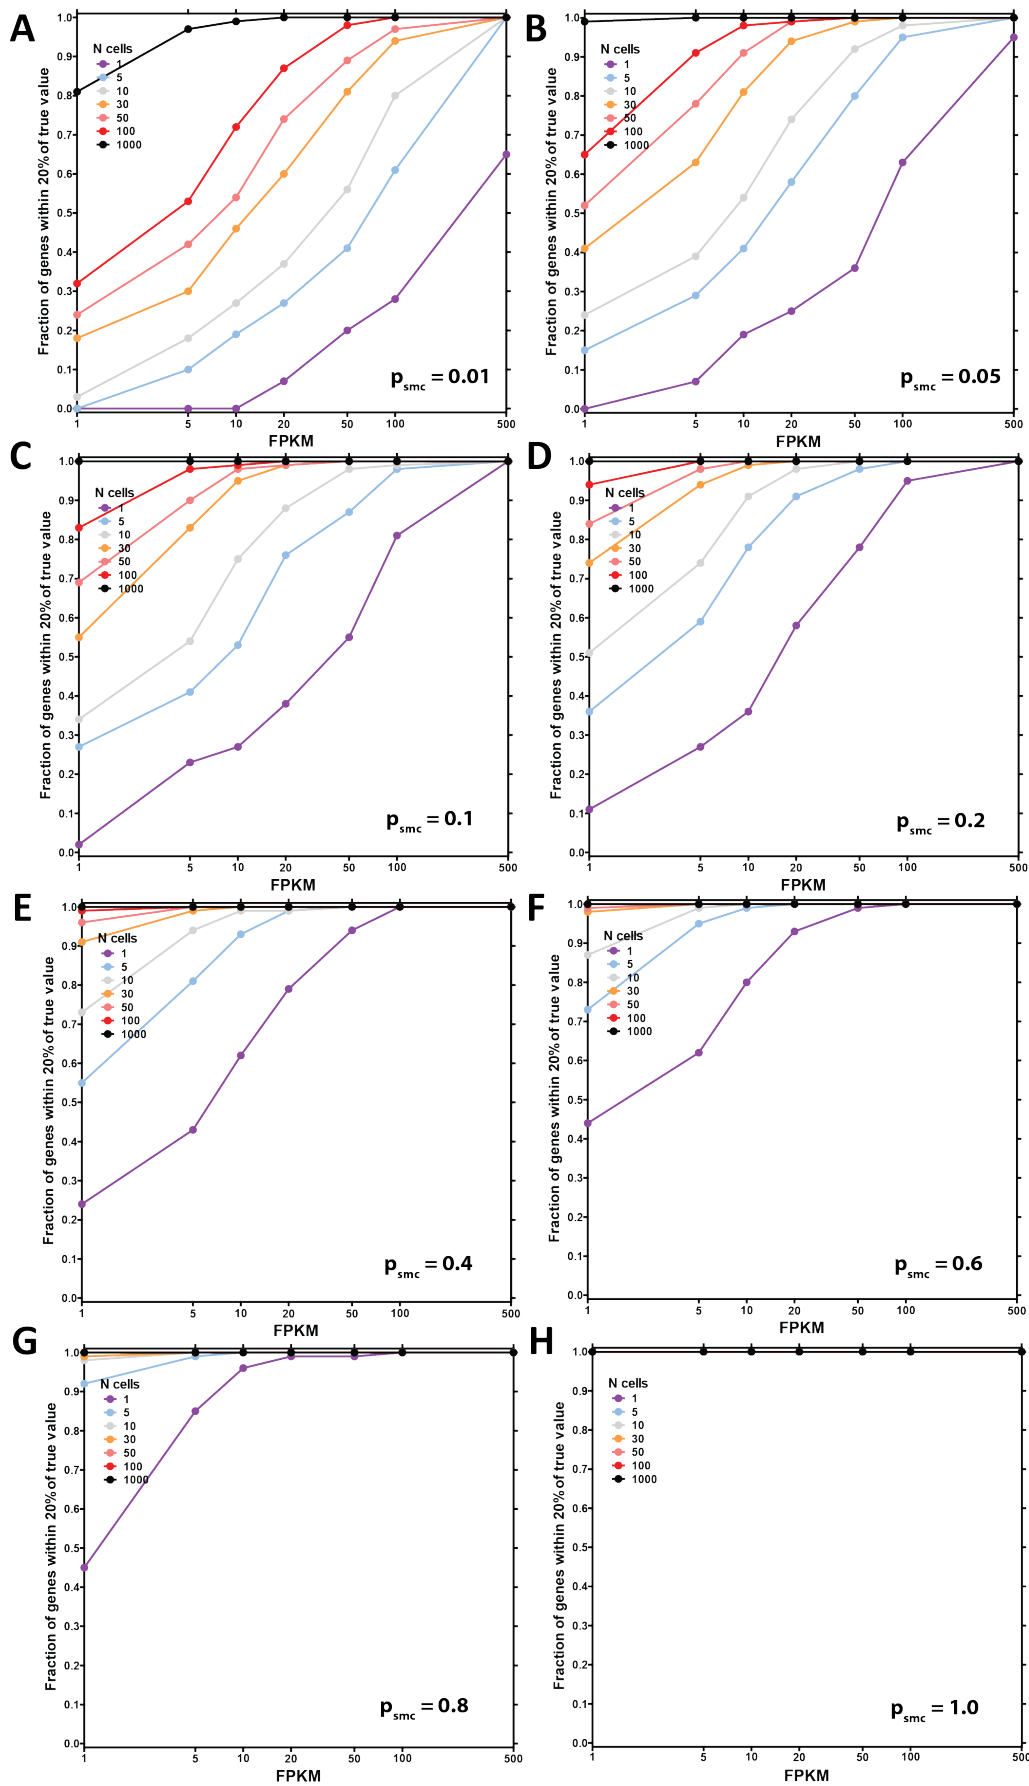

Supplementary Figure 10: Accuracy of estimation of gene abundance within a cell pool as a function of the number of cells pooled and the single molecule capture probability. Average of 500,000 mRNAs per cell. Shown is the fraction of genes at the indicated expression levels in FPKM in a bulk RNA-seq dataset, whose estimated expression level in FPKM in simulated libraries was within 20% of their true value after stochasticity due to the probability of capture of cells that express them and the single-molecule capture efficiency of the library-building protocol have been modeled. See the Methods section for full details on how the simulation was carried out.

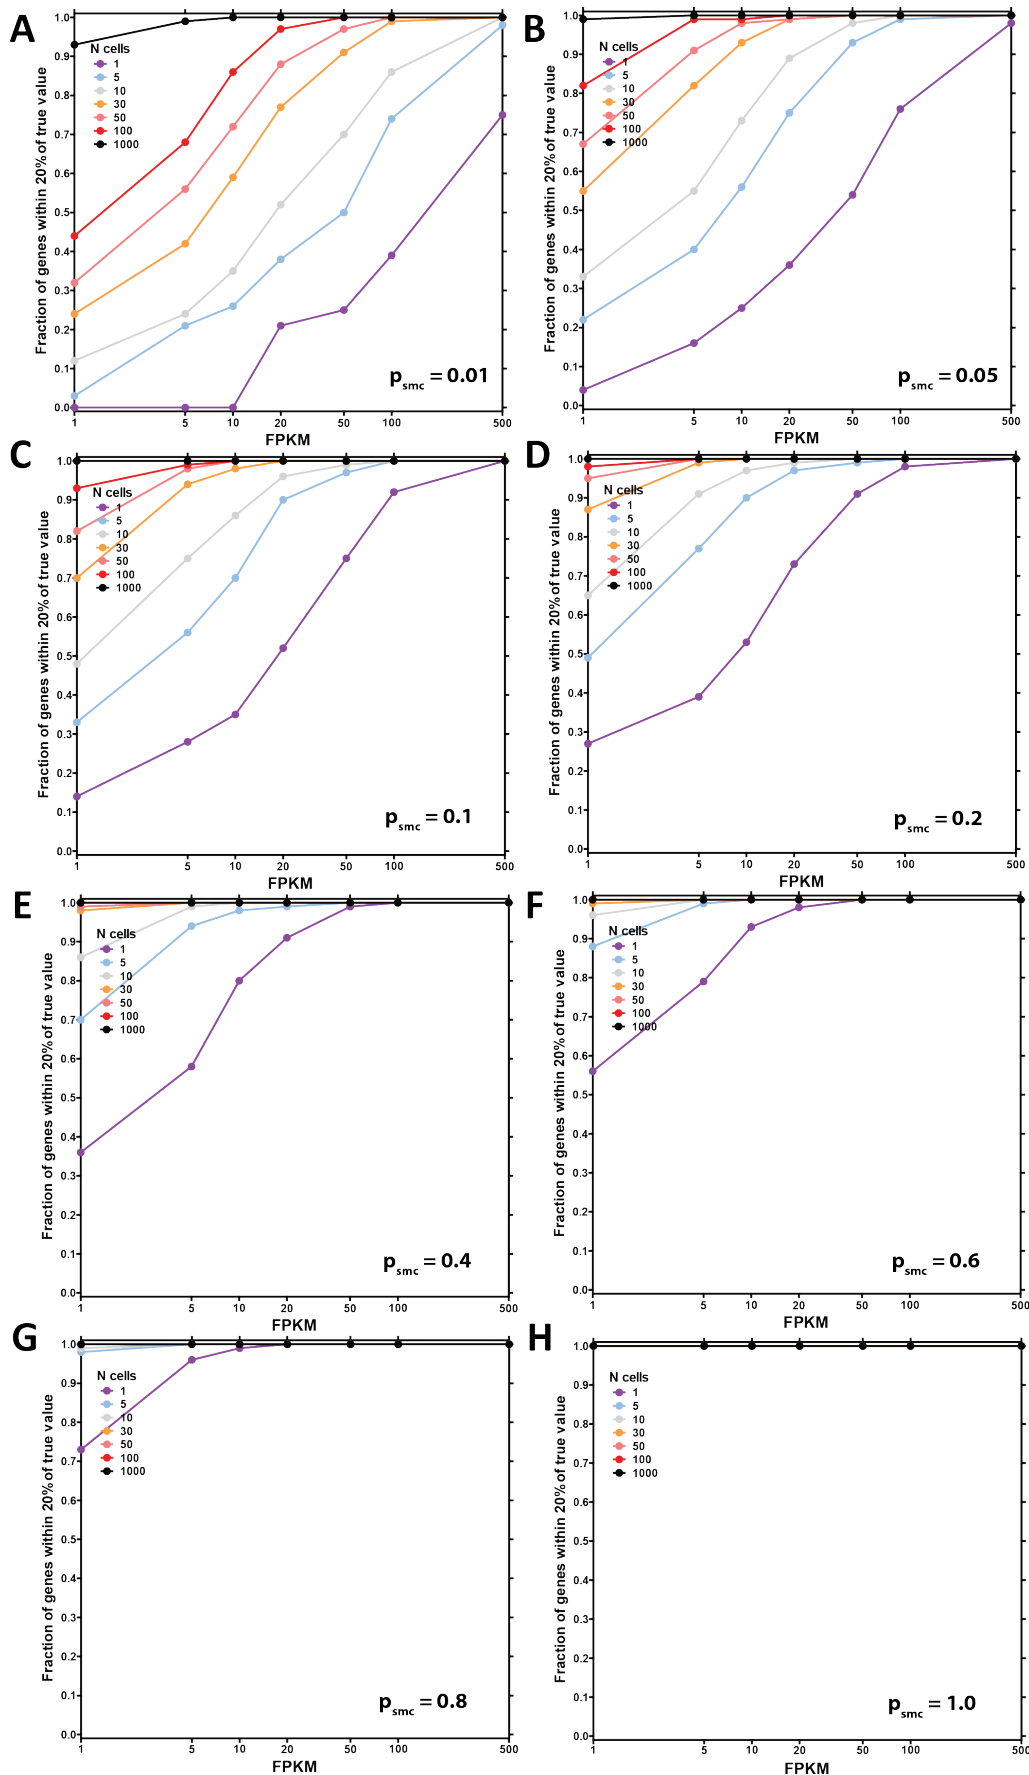

Supplementary Figure 11: Accuracy of estimation of gene abundance within a cell pool as a function of the number of cells pooled and the single molecule capture probability. Average of 1,000,000 mRNAs per cell. Shown is the fraction of genes at the indicated expression levels in FPKM in a bulk RNA-seq dataset, whose estimated expression level in FPKM in simulated libraries was within 20% of their true value after stochasticity due to the probability of capture of cells that express them and the single-molecule capture efficiency of the library-building protocol have been modeled. See the Methods section for full details on how the simulation was carried out.

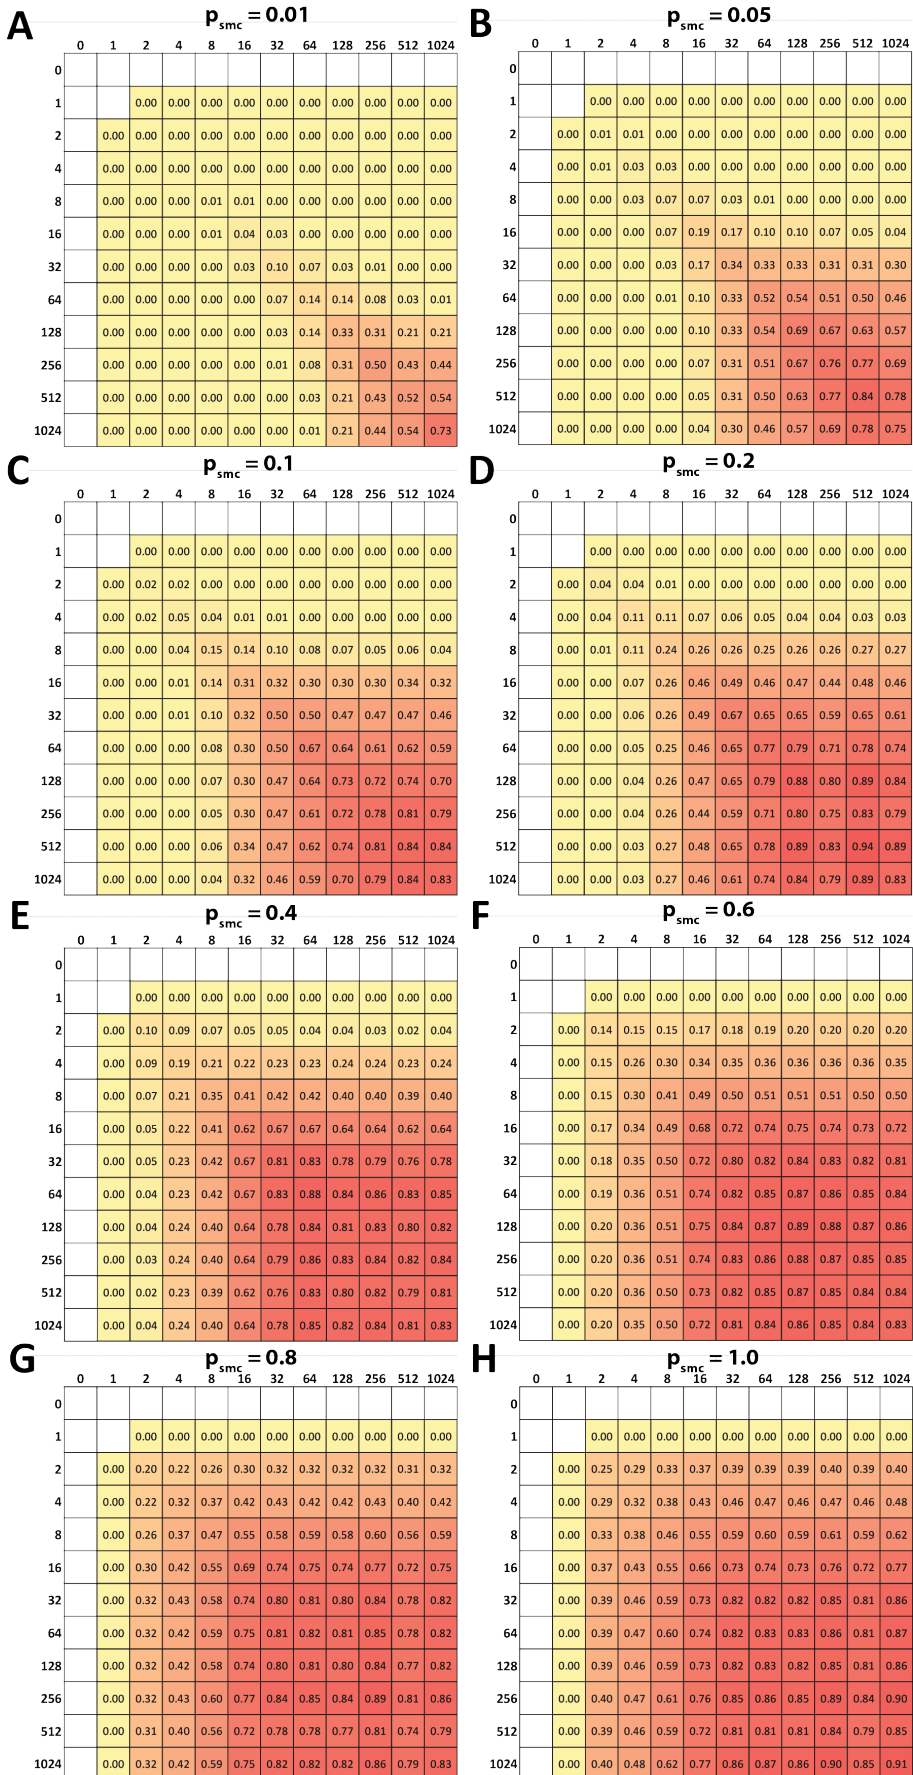

Supplementary Figure 12: Estimation of the ratio between the expression values of two genes in bulk RNA-seq as a function of the single molecule capture probability and the size of the cell pool in simulated transcriptomes. A single cell, average of 100,000 mRNAs per cell. Genes were split into groups according to their expression levels (step size of 1 on a  $\log_2$  scale, shown on each axis) and the fraction of gene pairs  $\{A, B\}$  for which  $R_{AB} < 0.5$  was calculated, where

$$R_{AB} = \frac{\frac{FPKM_A^{pool}}{FPKM_A^{pool} + FPKM_B^{pool}}}{\frac{FPKM_A^{bulk}}{FPKM_A^{bulk} + FPKM_B^{bulk}}}$$

and  $FPKM_A^{bulk} < FPKM_B^{bulk}$ . Empty cells contain no gene pairs with the indicated expression values.

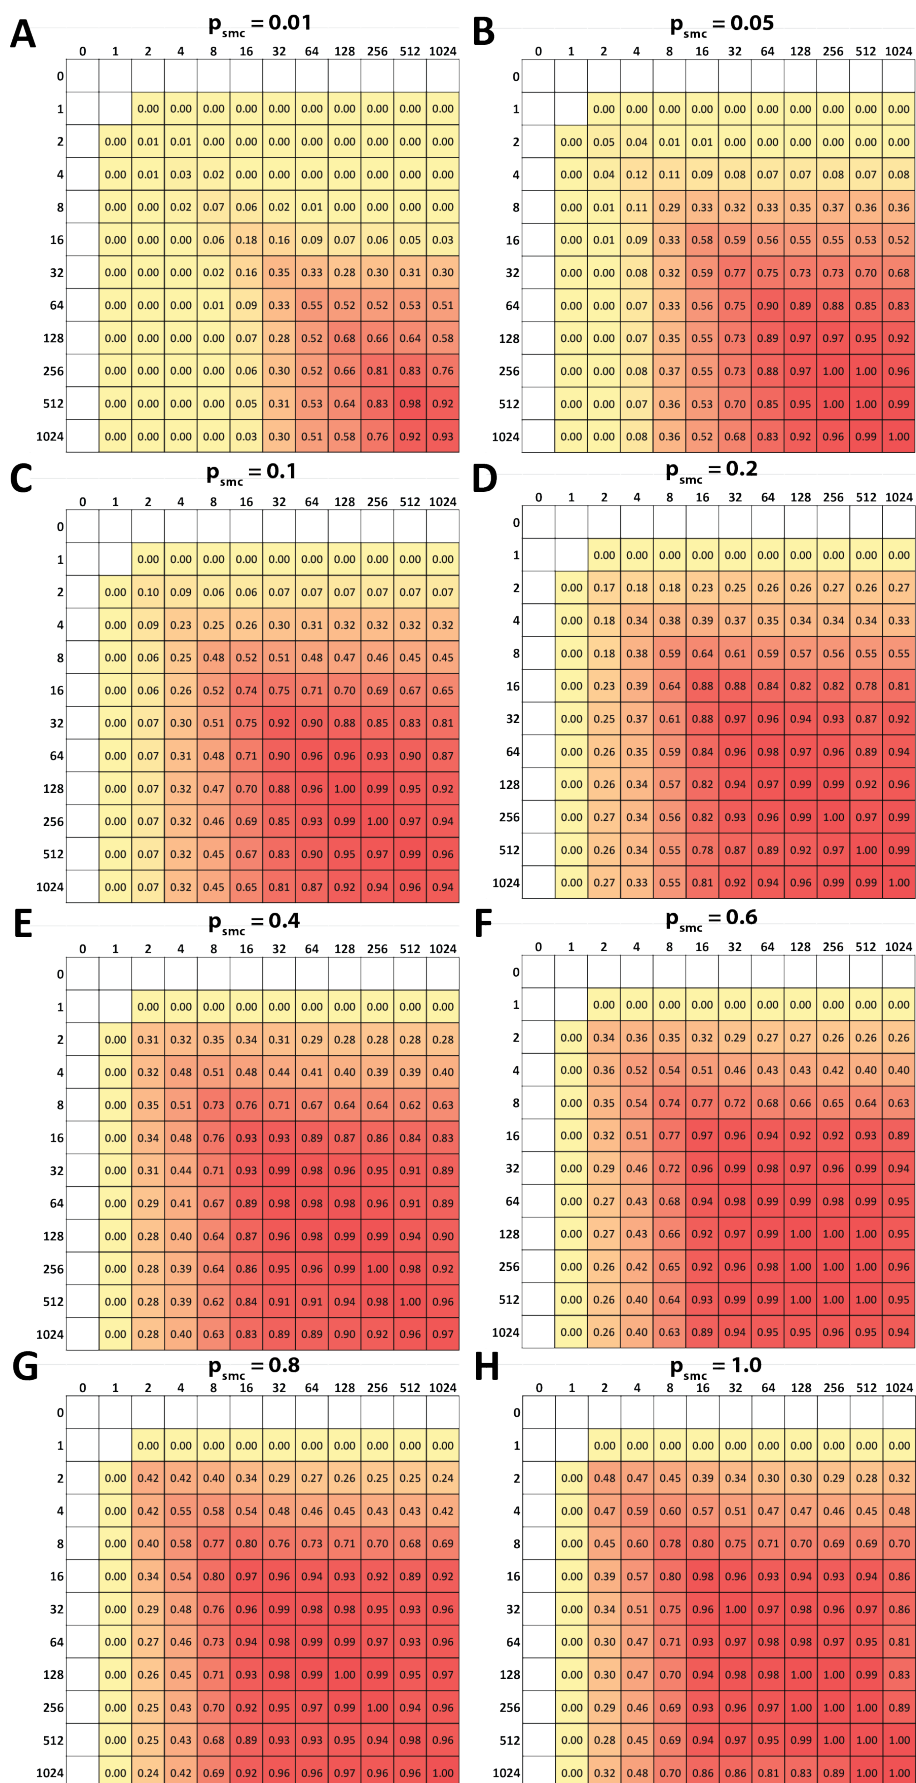

Supplementary Figure 13: Estimation of the ratio between the expression values of two genes in bulk RNA-seq as a function of the single molecule capture probability and the size of the cell pool in simulated transcriptomes. A pool of 5 cells, average of 100,000 mRNAs per cell. Genes were split into groups according to their expression levels (step size of 1 on a  $\log_2$  scale, shown on each axis) and the fraction of gene pairs  $\{A, B\}$  for which  $R_{AB} < 0.5$  was calculated, where

$$R_{AB} = \frac{\frac{\text{FPKM}_A^{\text{pool}}}{\text{FPKM}_A^{\text{pool}} + \text{FPKM}_B^{\text{pool}}}}{\frac{\text{FPKM}_A^{\text{bulk}}}{\text{FPKM}_A^{\text{bulk}} + \text{FPKM}_B^{\text{bulk}}}}$$

and  $\text{FPKM}_A^{\text{bulk}} < \text{FPKM}_B^{\text{bulk}}$ . Empty cells contain no gene pairs with the indicated expression values.

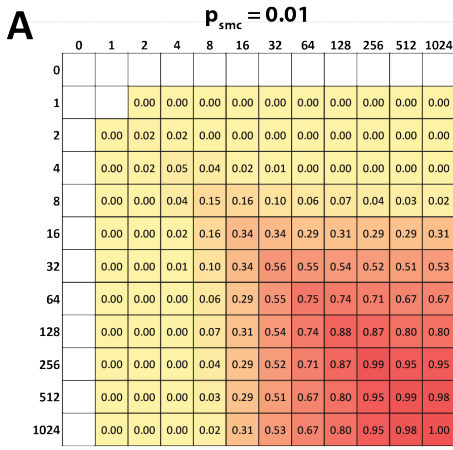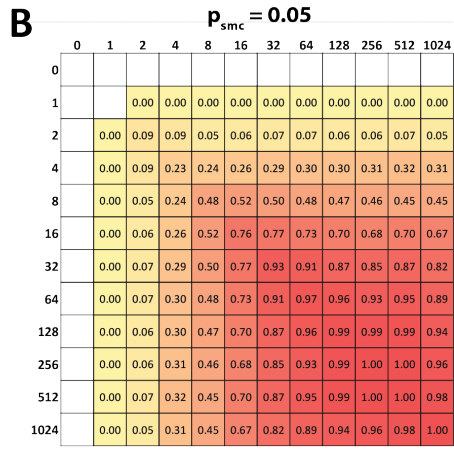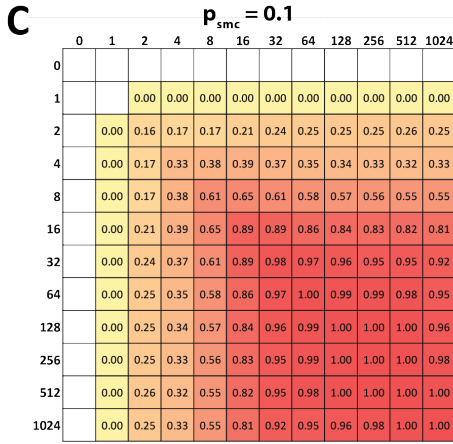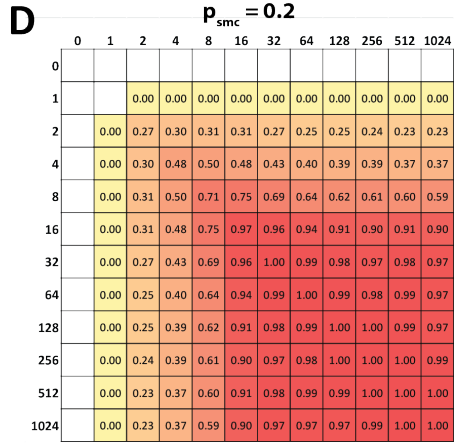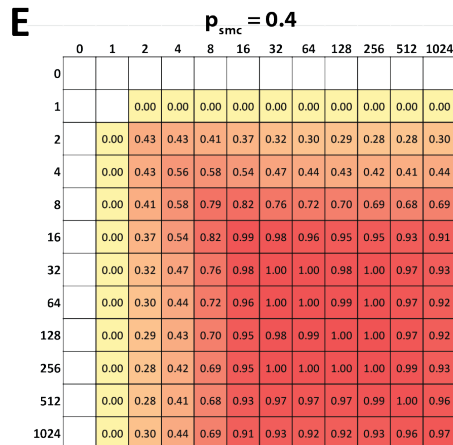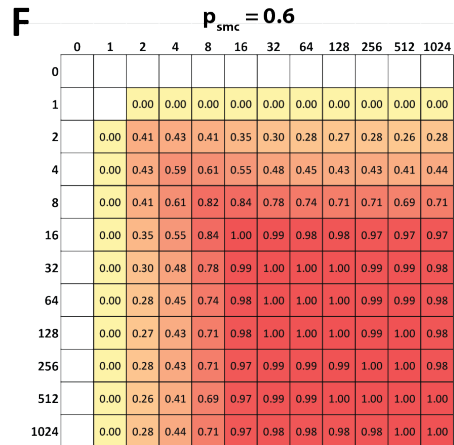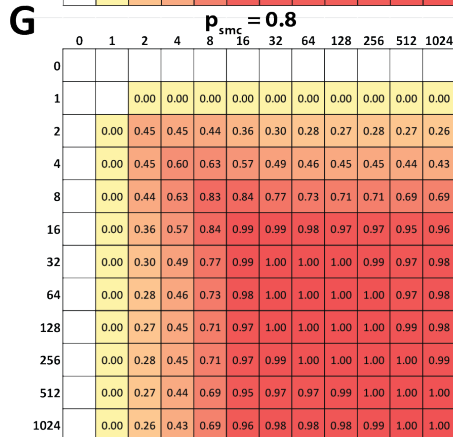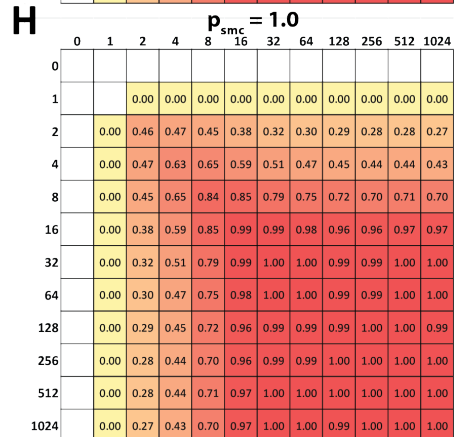

Supplementary Figure 14: Estimation of the ratio between the expression values of two genes in bulk RNA-seq as a function of the single molecule capture probability and the size of the cell pool in simulated transcriptomes. A pool of 10 cells, average of 100,000 mRNAs per cell. Genes were split into groups according to their expression levels (step size of 1 on a  $\log_2$  scale, shown on each axis) and the fraction of gene pairs  $\{A, B\}$  for which  $R_{AB} < 0.5$  was calculated, where

$$R_{AB} = \frac{\frac{\text{FPKM}_A^{\text{pool}}}{\text{FPKM}_A^{\text{pool}} + \text{FPKM}_B^{\text{pool}}}{\text{FPKM}_A^{\text{bulk}}}}{\frac{\text{FPKM}_A^{\text{bulk}}}{\text{FPKM}_A^{\text{bulk}} + \text{FPKM}_B^{\text{bulk}}}}$$

and  $\text{FPKM}_A^{\text{bulk}} < \text{FPKM}_B^{\text{bulk}}$ . Empty cells contain no gene pairs with the indicated expression values.

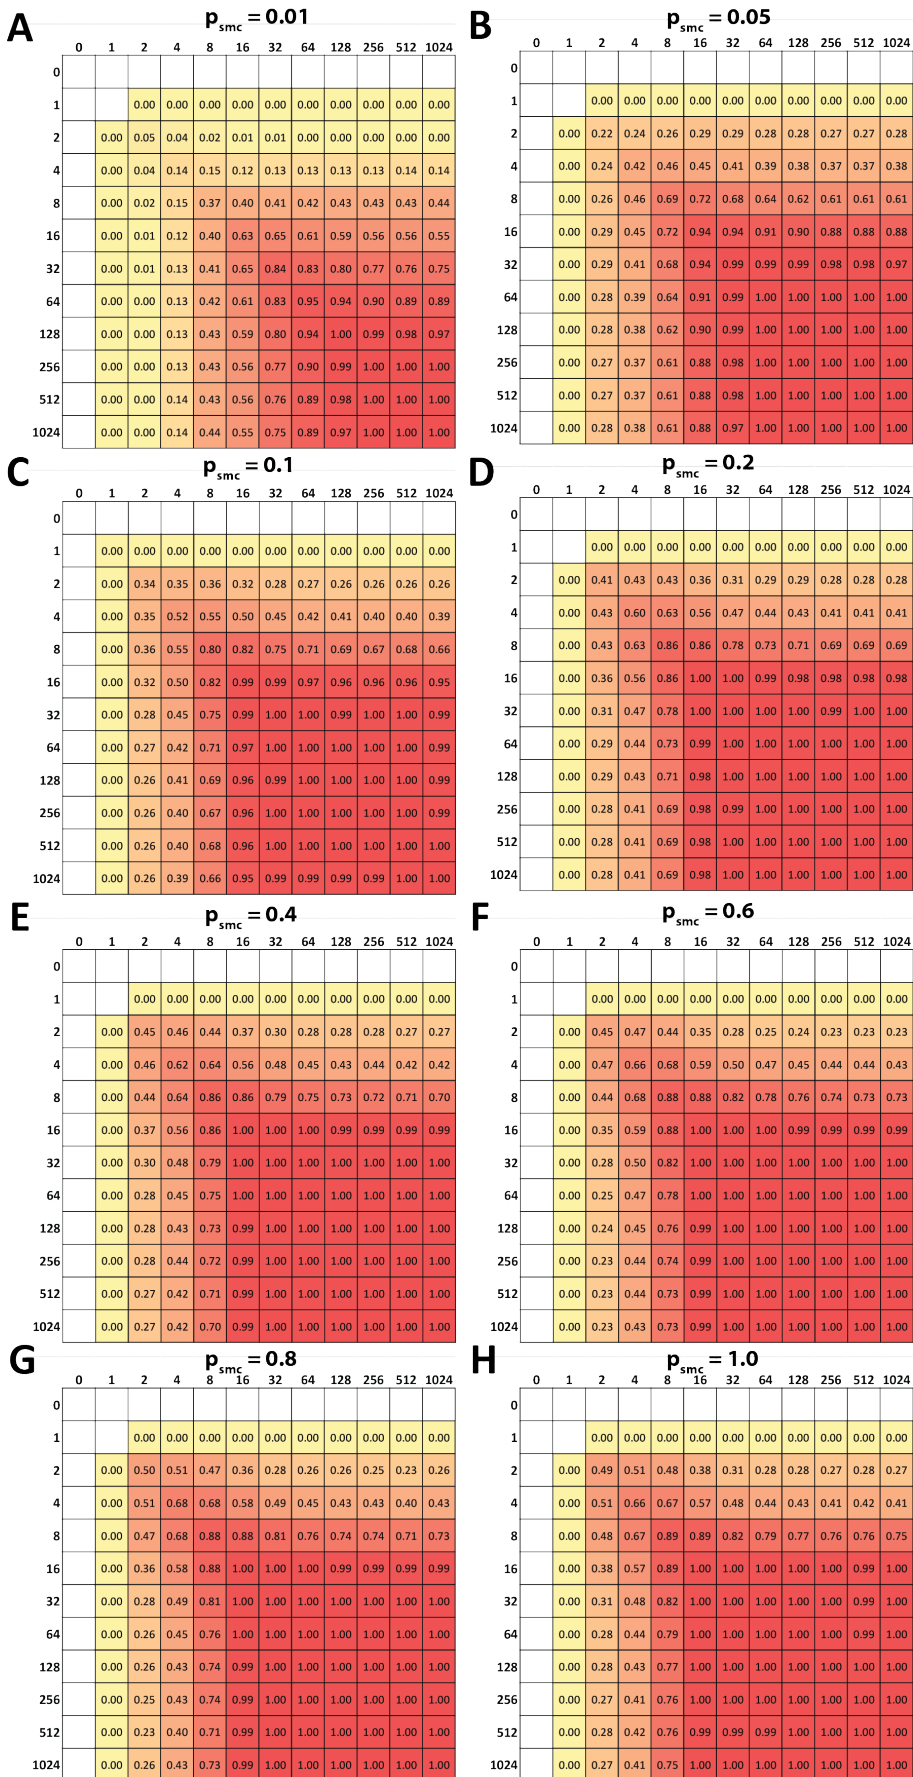

Supplementary Figure 15: Estimation of the ratio between the expression values of two genes in bulk RNA-seq as a function of the single molecule capture probability and the size of the cell pool in simulated transcriptomes. A pool of 30 cells, average of 100,000 mRNAs per cell. Genes were split into groups according to their expression levels (step size of 1 on a  $\log_2$  scale, shown on each axis) and the fraction of gene pairs  $\{A, B\}$  for which  $R_{AB} < 0.5$  was calculated, where

$$R_{AB} = \frac{\frac{\text{FPKM}_A^{\text{pool}}}{\text{FPKM}_A^{\text{pool}} + \text{FPKM}_B^{\text{pool}}}}{\frac{\text{FPKM}_A^{\text{bulk}}}{\text{FPKM}_A^{\text{bulk}} + \text{FPKM}_B^{\text{bulk}}}}$$

and  $\text{FPKM}_A^{\text{bulk}} < \text{FPKM}_B^{\text{bulk}}$ . Empty cells contain no gene pairs with the indicated expression values.

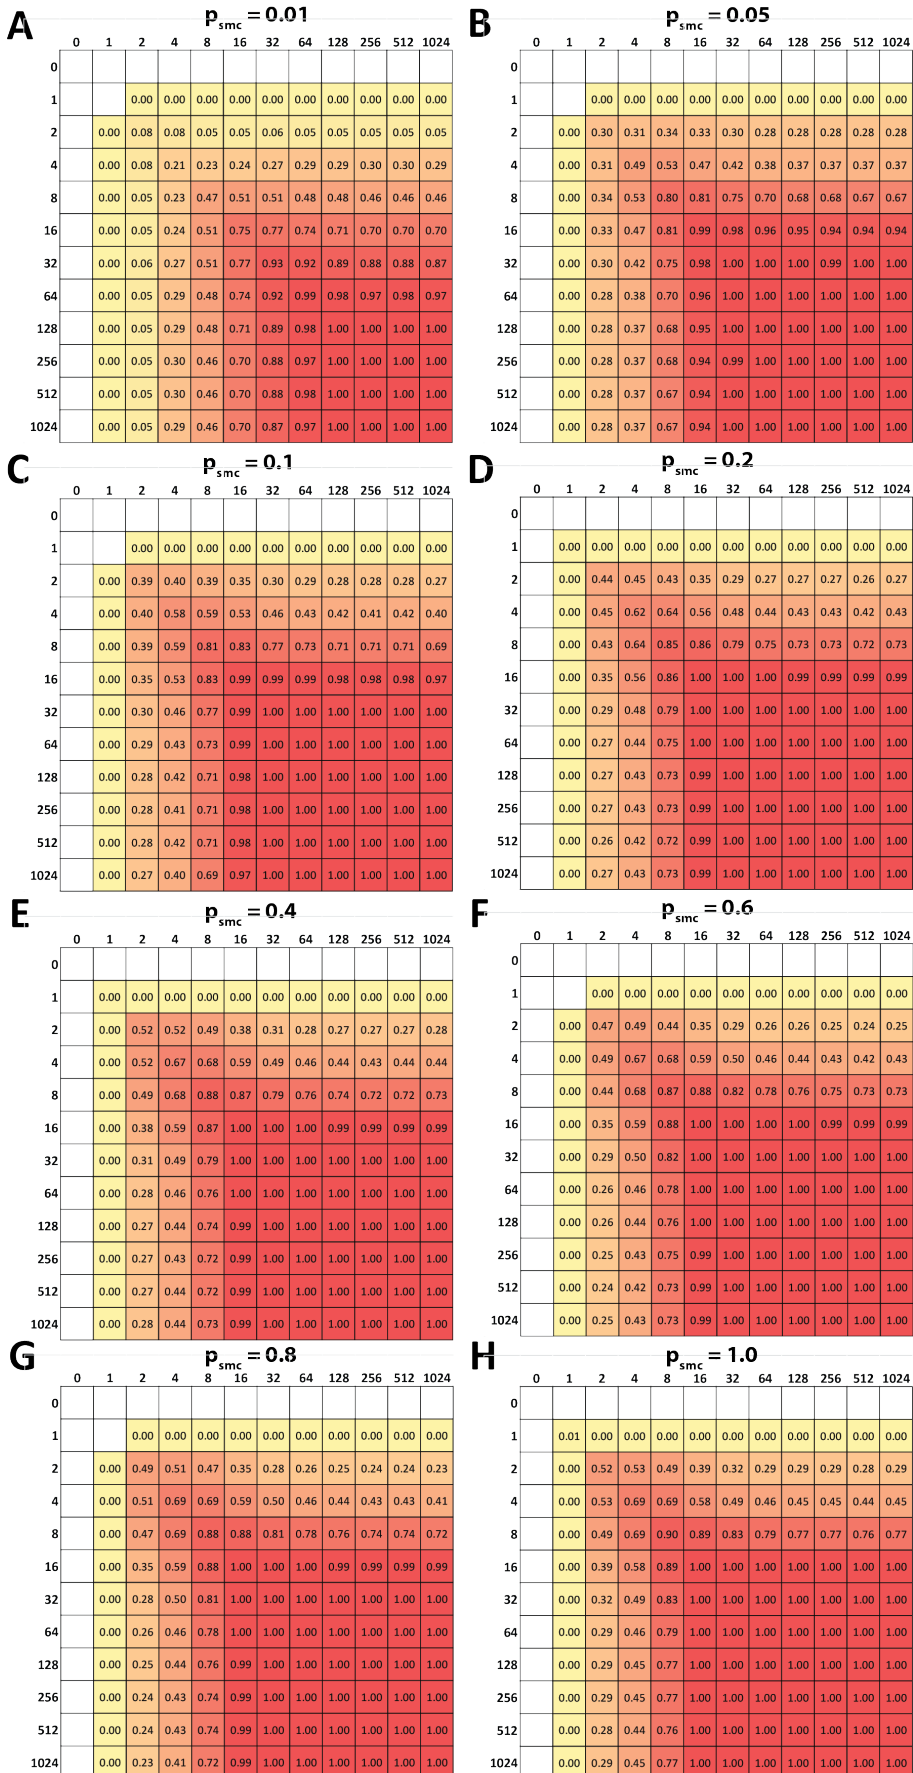

Supplementary Figure 16: Estimation of the ratio between the expression values of two genes in bulk RNA-seq as a function of the single molecule capture probability and the size of the cell pool in simulated transcriptomes. A pool of 50 cells, average of 100,000 mRNAs per cell. Genes were split into groups according to their expression levels (step size of 1 on a  $\log_2$  scale, shown on each axis) and the fraction of gene pairs  $\{A, B\}$  for which  $R_{AB} < 0.5$  was calculated, where

$$R_{AB} = \frac{\frac{\text{FPKM}_A^{\text{pool}}}{\text{FPKM}_A^{\text{pool}} + \text{FPKM}_B^{\text{pool}}}}{\frac{\text{FPKM}_A^{\text{bulk}}}{\text{FPKM}_A^{\text{bulk}} + \text{FPKM}_B^{\text{bulk}}}}$$

and  $\text{FPKM}_A^{\text{bulk}} < \text{FPKM}_B^{\text{bulk}}$ . Empty cells contain no gene pairs with the indicated expression values.

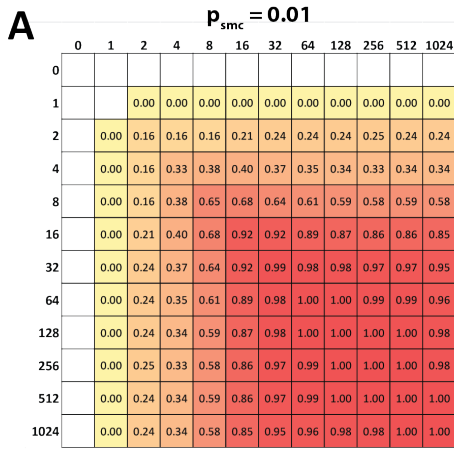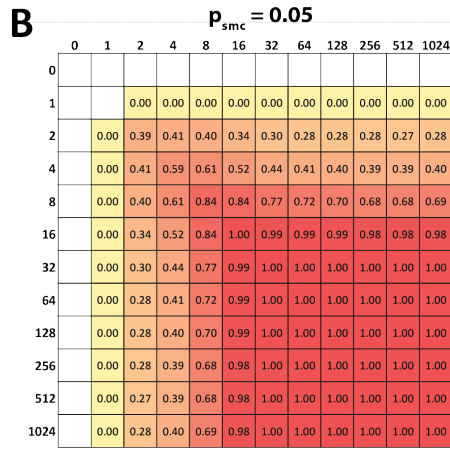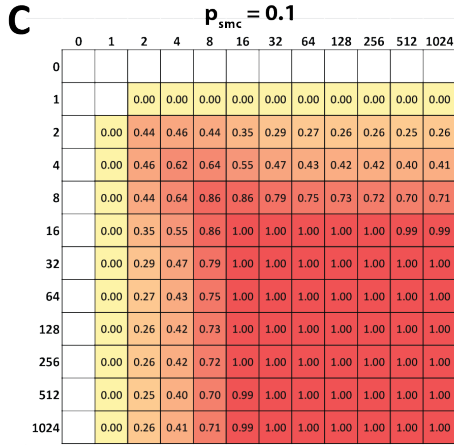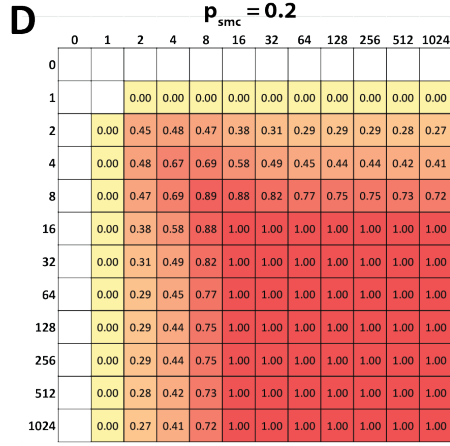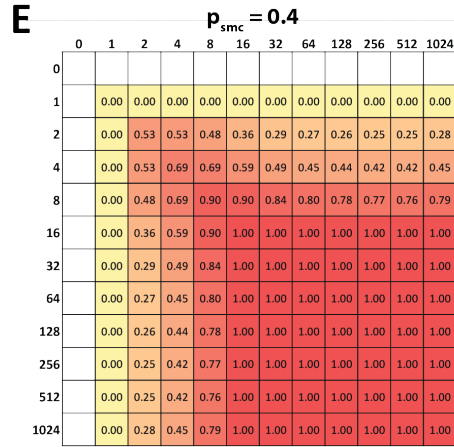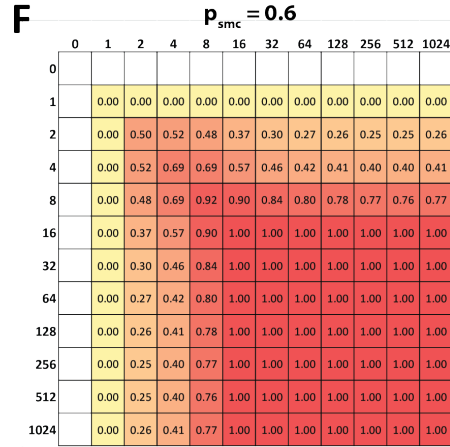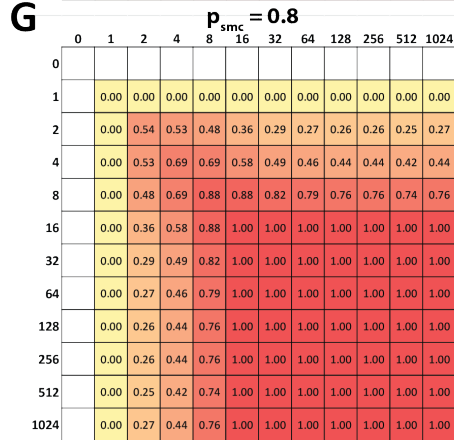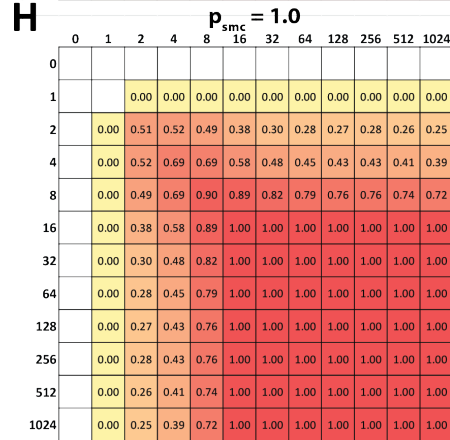

Supplementary Figure 17: Estimation of the ratio between the expression values of two genes in bulk RNA-seq as a function of the single molecule capture probability and the size of the cell pool in simulated transcriptomes. A pool of 100 cells, average of 100,000 mRNAs per cell. Genes were split into groups according to their expression levels (step size of 1 on a  $\log_2$  scale, shown on each axis) and the fraction of gene pairs  $\{A, B\}$  for which  $R_{AB} < 0.5$  was calculated, where

$$R_{AB} = \frac{\frac{\text{FPKM}_A^{\text{pool}}}{\text{FPKM}_A^{\text{pool}} + \text{FPKM}_B^{\text{pool}}}}{\frac{\text{FPKM}_A^{\text{bulk}}}{\text{FPKM}_A^{\text{bulk}} + \text{FPKM}_B^{\text{bulk}}}}$$

and  $\text{FPKM}_A^{\text{bulk}} < \text{FPKM}_B^{\text{bulk}}$ . Empty cells contain no gene pairs with the indicated expression values.



**A**  $p_{smc} = 0.01$

|      | 0 | 1 | 2    | 4    | 8    | 16   | 32   | 64   | 128  | 256  | 512  | 1024 |
|------|---|---|------|------|------|------|------|------|------|------|------|------|
| 0    |   |   |      |      |      |      |      |      |      |      |      |      |
| 1    |   |   | 0.00 | 0.00 | 0.00 | 0.00 | 0.00 | 0.00 | 0.00 | 0.00 | 0.00 | 0.00 |
| 2    |   |   | 0.00 | 0.42 | 0.45 | 0.42 | 0.35 | 0.29 | 0.28 | 0.27 | 0.26 | 0.26 |
| 4    |   |   | 0.00 | 0.45 | 0.64 | 0.66 | 0.56 | 0.47 | 0.44 | 0.42 | 0.39 | 0.41 |
| 8    |   |   | 0.00 | 0.42 | 0.66 | 0.88 | 0.88 | 0.81 | 0.77 | 0.75 | 0.74 | 0.73 |
| 16   |   |   | 0.00 | 0.35 | 0.56 | 0.88 | 1.00 | 1.00 | 1.00 | 0.99 | 0.99 | 0.99 |
| 32   |   |   | 0.00 | 0.29 | 0.47 | 0.81 | 1.00 | 1.00 | 1.00 | 1.00 | 1.00 | 1.00 |
| 64   |   |   | 0.00 | 0.28 | 0.44 | 0.77 | 1.00 | 1.00 | 1.00 | 1.00 | 1.00 | 1.00 |
| 128  |   |   | 0.00 | 0.27 | 0.42 | 0.75 | 0.99 | 1.00 | 1.00 | 1.00 | 1.00 | 1.00 |
| 256  |   |   | 0.00 | 0.26 | 0.42 | 0.74 | 0.99 | 1.00 | 1.00 | 1.00 | 1.00 | 1.00 |
| 512  |   |   | 0.00 | 0.25 | 0.39 | 0.71 | 0.99 | 1.00 | 1.00 | 1.00 | 1.00 | 1.00 |
| 1024 |   |   | 0.00 | 0.26 | 0.41 | 0.73 | 0.99 | 1.00 | 1.00 | 1.00 | 1.00 | 1.00 |

**B**  $p_{smc} = 0.05$

|      | 0 | 1 | 2    | 4    | 8    | 16   | 32   | 64   | 128  | 256  | 512  | 1024 |
|------|---|---|------|------|------|------|------|------|------|------|------|------|
| 0    |   |   |      |      |      |      |      |      |      |      |      |      |
| 1    |   |   | 0.00 | 0.00 | 0.00 | 0.00 | 0.00 | 0.00 | 0.00 | 0.00 | 0.00 | 0.00 |
| 2    |   |   | 0.00 | 0.53 | 0.53 | 0.49 | 0.38 | 0.30 | 0.28 | 0.27 | 0.27 | 0.27 |
| 4    |   |   | 0.00 | 0.53 | 0.69 | 0.70 | 0.59 | 0.49 | 0.45 | 0.43 | 0.43 | 0.43 |
| 8    |   |   | 0.00 | 0.49 | 0.70 | 0.90 | 0.89 | 0.83 | 0.78 | 0.76 | 0.75 | 0.75 |
| 16   |   |   | 0.00 | 0.38 | 0.59 | 0.89 | 1.00 | 1.00 | 1.00 | 1.00 | 1.00 | 1.00 |
| 32   |   |   | 0.00 | 0.30 | 0.49 | 0.83 | 1.00 | 1.00 | 1.00 | 1.00 | 1.00 | 1.00 |
| 64   |   |   | 0.00 | 0.28 | 0.45 | 0.78 | 1.00 | 1.00 | 1.00 | 1.00 | 1.00 | 1.00 |
| 128  |   |   | 0.00 | 0.27 | 0.43 | 0.76 | 1.00 | 1.00 | 1.00 | 1.00 | 1.00 | 1.00 |
| 256  |   |   | 0.00 | 0.27 | 0.43 | 0.75 | 1.00 | 1.00 | 1.00 | 1.00 | 1.00 | 1.00 |
| 512  |   |   | 0.00 | 0.27 | 0.42 | 0.75 | 1.00 | 1.00 | 1.00 | 1.00 | 1.00 | 1.00 |
| 1024 |   |   | 0.00 | 0.27 | 0.43 | 0.75 | 1.00 | 1.00 | 1.00 | 1.00 | 1.00 | 1.00 |

**C**  $p_{smc} = 0.1$

|      | 0 | 1 | 2    | 4    | 8    | 16   | 32   | 64   | 128  | 256  | 512  | 1024 |
|------|---|---|------|------|------|------|------|------|------|------|------|------|
| 0    |   |   |      |      |      |      |      |      |      |      |      |      |
| 1    |   |   | 0.00 | 0.00 | 0.00 | 0.00 | 0.00 | 0.00 | 0.00 | 0.00 | 0.00 | 0.00 |
| 2    |   |   | 0.00 | 0.49 | 0.51 | 0.47 | 0.36 | 0.29 | 0.26 | 0.25 | 0.25 | 0.24 |
| 4    |   |   | 0.00 | 0.51 | 0.70 | 0.70 | 0.60 | 0.50 | 0.47 | 0.46 | 0.44 | 0.43 |
| 8    |   |   | 0.00 | 0.47 | 0.70 | 0.90 | 0.89 | 0.82 | 0.78 | 0.76 | 0.74 | 0.73 |
| 16   |   |   | 0.00 | 0.36 | 0.60 | 0.89 | 1.00 | 1.00 | 1.00 | 1.00 | 1.00 | 1.00 |
| 32   |   |   | 0.00 | 0.29 | 0.50 | 0.82 | 1.00 | 1.00 | 1.00 | 1.00 | 1.00 | 1.00 |
| 64   |   |   | 0.00 | 0.26 | 0.47 | 0.78 | 1.00 | 1.00 | 1.00 | 1.00 | 1.00 | 1.00 |
| 128  |   |   | 0.00 | 0.25 | 0.46 | 0.76 | 1.00 | 1.00 | 1.00 | 1.00 | 1.00 | 1.00 |
| 256  |   |   | 0.00 | 0.25 | 0.44 | 0.74 | 1.00 | 1.00 | 1.00 | 1.00 | 1.00 | 1.00 |
| 512  |   |   | 0.00 | 0.25 | 0.45 | 0.74 | 1.00 | 1.00 | 1.00 | 1.00 | 1.00 | 1.00 |
| 1024 |   |   | 0.00 | 0.24 | 0.43 | 0.73 | 1.00 | 1.00 | 1.00 | 1.00 | 1.00 | 1.00 |

**D**  $p_{smc} = 0.2$

|      | 0 | 1 | 2    | 4    | 8    | 16   | 32   | 64   | 128  | 256  | 512  | 1024 |
|------|---|---|------|------|------|------|------|------|------|------|------|------|
| 0    |   |   |      |      |      |      |      |      |      |      |      |      |
| 1    |   |   | 0.00 | 0.00 | 0.00 | 0.00 | 0.00 | 0.00 | 0.00 | 0.00 | 0.00 | 0.00 |
| 2    |   |   | 0.00 | 0.51 | 0.52 | 0.48 | 0.36 | 0.29 | 0.26 | 0.26 | 0.25 | 0.24 |
| 4    |   |   | 0.00 | 0.52 | 0.69 | 0.70 | 0.59 | 0.49 | 0.45 | 0.44 | 0.43 | 0.41 |
| 8    |   |   | 0.00 | 0.48 | 0.70 | 0.91 | 0.90 | 0.85 | 0.80 | 0.78 | 0.77 | 0.75 |
| 16   |   |   | 0.00 | 0.36 | 0.59 | 0.90 | 1.00 | 1.00 | 1.00 | 1.00 | 1.00 | 1.00 |
| 32   |   |   | 0.00 | 0.29 | 0.49 | 0.85 | 1.00 | 1.00 | 1.00 | 1.00 | 1.00 | 1.00 |
| 64   |   |   | 0.00 | 0.26 | 0.45 | 0.80 | 1.00 | 1.00 | 1.00 | 1.00 | 1.00 | 1.00 |
| 128  |   |   | 0.00 | 0.26 | 0.44 | 0.78 | 1.00 | 1.00 | 1.00 | 1.00 | 1.00 | 1.00 |
| 256  |   |   | 0.00 | 0.25 | 0.43 | 0.77 | 1.00 | 1.00 | 1.00 | 1.00 | 1.00 | 1.00 |
| 512  |   |   | 0.00 | 0.25 | 0.42 | 0.76 | 1.00 | 1.00 | 1.00 | 1.00 | 1.00 | 1.00 |
| 1024 |   |   | 0.00 | 0.24 | 0.41 | 0.75 | 1.00 | 1.00 | 1.00 | 1.00 | 1.00 | 1.00 |

**E**  $p_{smc} = 0.4$

|      | 0 | 1 | 2    | 4    | 8    | 16   | 32   | 64   | 128  | 256  | 512  | 1024 |
|------|---|---|------|------|------|------|------|------|------|------|------|------|
| 0    |   |   |      |      |      |      |      |      |      |      |      |      |
| 1    |   |   | 0.00 | 0.00 | 0.00 | 0.00 | 0.00 | 0.00 | 0.00 | 0.00 | 0.00 | 0.00 |
| 2    |   |   | 0.00 | 0.52 | 0.54 | 0.50 | 0.40 | 0.32 | 0.29 | 0.28 | 0.28 | 0.27 |
| 4    |   |   | 0.00 | 0.54 | 0.72 | 0.72 | 0.60 | 0.50 | 0.46 | 0.44 | 0.44 | 0.42 |
| 8    |   |   | 0.00 | 0.50 | 0.72 | 0.92 | 0.90 | 0.84 | 0.80 | 0.78 | 0.77 | 0.75 |
| 16   |   |   | 0.00 | 0.40 | 0.60 | 0.90 | 1.00 | 1.00 | 1.00 | 1.00 | 1.00 | 1.00 |
| 32   |   |   | 0.00 | 0.32 | 0.50 | 0.84 | 1.00 | 1.00 | 1.00 | 1.00 | 1.00 | 1.00 |
| 64   |   |   | 0.00 | 0.29 | 0.46 | 0.80 | 1.00 | 1.00 | 1.00 | 1.00 | 1.00 | 1.00 |
| 128  |   |   | 0.00 | 0.28 | 0.44 | 0.78 | 1.00 | 1.00 | 1.00 | 1.00 | 1.00 | 1.00 |
| 256  |   |   | 0.00 | 0.28 | 0.44 | 0.77 | 1.00 | 1.00 | 1.00 | 1.00 | 1.00 | 1.00 |
| 512  |   |   | 0.00 | 0.28 | 0.44 | 0.76 | 1.00 | 1.00 | 1.00 | 1.00 | 1.00 | 1.00 |
| 1024 |   |   | 0.00 | 0.27 | 0.42 | 0.75 | 1.00 | 1.00 | 1.00 | 1.00 | 1.00 | 1.00 |

**F**  $p_{smc} = 0.6$

|      | 0 | 1 | 2    | 4    | 8    | 16   | 32   | 64   | 128  | 256  | 512  | 1024 |
|------|---|---|------|------|------|------|------|------|------|------|------|------|
| 0    |   |   |      |      |      |      |      |      |      |      |      |      |
| 1    |   |   | 0.00 | 0.00 | 0.00 | 0.00 | 0.00 | 0.00 | 0.00 | 0.00 | 0.00 | 0.00 |
| 2    |   |   | 0.00 | 0.51 | 0.53 | 0.49 | 0.38 | 0.31 | 0.28 | 0.27 | 0.27 | 0.27 |
| 4    |   |   | 0.00 | 0.53 | 0.70 | 0.71 | 0.61 | 0.52 | 0.48 | 0.46 | 0.46 | 0.45 |
| 8    |   |   | 0.00 | 0.49 | 0.71 | 0.90 | 0.90 | 0.84 | 0.80 | 0.77 | 0.77 | 0.76 |
| 16   |   |   | 0.00 | 0.38 | 0.61 | 0.90 | 1.00 | 1.00 | 1.00 | 1.00 | 1.00 | 1.00 |
| 32   |   |   | 0.00 | 0.31 | 0.52 | 0.84 | 1.00 | 1.00 | 1.00 | 1.00 | 1.00 | 1.00 |
| 64   |   |   | 0.00 | 0.28 | 0.48 | 0.80 | 1.00 | 1.00 | 1.00 | 1.00 | 1.00 | 1.00 |
| 128  |   |   | 0.00 | 0.27 | 0.46 | 0.77 | 1.00 | 1.00 | 1.00 | 1.00 | 1.00 | 1.00 |
| 256  |   |   | 0.00 | 0.27 | 0.46 | 0.77 | 1.00 | 1.00 | 1.00 | 1.00 | 1.00 | 1.00 |
| 512  |   |   | 0.00 | 0.27 | 0.45 | 0.76 | 1.00 | 1.00 | 1.00 | 1.00 | 1.00 | 1.00 |
| 1024 |   |   | 0.00 | 0.27 | 0.45 | 0.76 | 1.00 | 1.00 | 1.00 | 1.00 | 1.00 | 1.00 |

**G**  $p_{smc} = 0.8$

|      | 0 | 1 | 2    | 4    | 8    | 16   | 32   | 64   | 128  | 256  | 512  | 1024 |
|------|---|---|------|------|------|------|------|------|------|------|------|------|
| 0    |   |   |      |      |      |      |      |      |      |      |      |      |
| 1    |   |   | 0.01 | 0.00 | 0.00 | 0.00 | 0.00 | 0.00 | 0.00 | 0.00 | 0.00 | 0.00 |
| 2    |   |   | 0.00 | 0.54 | 0.54 | 0.48 | 0.36 | 0.28 | 0.26 | 0.25 | 0.25 | 0.26 |
| 4    |   |   | 0.00 | 0.54 | 0.71 | 0.71 | 0.60 | 0.49 | 0.45 | 0.43 | 0.43 | 0.44 |
| 8    |   |   | 0.00 | 0.48 | 0.71 | 0.90 | 0.89 | 0.83 | 0.79 | 0.76 | 0.76 | 0.75 |
| 16   |   |   | 0.00 | 0.36 | 0.60 | 0.89 | 1.00 | 1.00 | 1.00 | 1.00 | 1.00 | 1.00 |
| 32   |   |   | 0.00 | 0.28 | 0.49 | 0.83 | 1.00 | 1.00 | 1.00 | 1.00 | 1.00 | 1.00 |
| 64   |   |   | 0.00 | 0.26 | 0.45 | 0.79 | 1.00 | 1.00 | 1.00 | 1.00 | 1.00 | 1.00 |
| 128  |   |   | 0.00 | 0.25 | 0.43 | 0.76 | 1.00 | 1.00 | 1.00 | 1.00 | 1.00 | 1.00 |
| 256  |   |   | 0.00 | 0.25 | 0.43 | 0.76 | 1.00 | 1.00 | 1.00 | 1.00 | 1.00 | 1.00 |
| 512  |   |   | 0.00 | 0.25 | 0.42 | 0.75 | 1.00 | 1.00 | 1.00 | 1.00 | 1.00 | 1.00 |
| 1024 |   |   | 0.00 | 0.26 | 0.44 | 0.75 | 1.00 | 1.00 | 1.00 | 1.00 | 1.00 | 1.00 |

**H**  $p_{smc} = 1.0$

|      | 0 | 1 | 2    | 4    | 8    | 16   | 32   | 64   | 128  | 256  | 512  | 1024 |
|------|---|---|------|------|------|------|------|------|------|------|------|------|
| 0    |   |   |      |      |      |      |      |      |      |      |      |      |
| 1    |   |   | 0.00 | 0.00 | 0.00 | 0.00 | 0.00 | 0.00 | 0.00 | 0.00 | 0.00 | 0.00 |
| 2    |   |   | 0.00 | 0.51 | 0.53 | 0.50 | 0.38 | 0.31 | 0.28 | 0.27 | 0.26 | 0.25 |
| 4    |   |   | 0.00 | 0.53 | 0.70 | 0.71 | 0.60 | 0.50 | 0.46 | 0.44 | 0.43 | 0.41 |
| 8    |   |   | 0.00 | 0.50 | 0.71 | 0.90 | 0.89 | 0.82 | 0.78 | 0.76 | 0.75 | 0.74 |
| 16   |   |   | 0.00 | 0.38 | 0.60 | 0.89 | 1.00 | 1.00 | 1.00 | 1.00 | 1.00 | 1.00 |
| 32   |   |   | 0.00 | 0.31 | 0.50 | 0.82 | 1.00 | 1.00 | 1.00 | 1.00 | 1.00 | 1.00 |
| 64   |   |   | 0.00 | 0.28 | 0.46 | 0.78 | 1.00 | 1.00 | 1.00 | 1.00 | 1.00 | 1.00 |
| 128  |   |   | 0.00 | 0.27 | 0.44 | 0.76 | 1.00 | 1.00 | 1.00 | 1.00 | 1.00 | 1.00 |
| 256  |   |   | 0.00 | 0.26 | 0.43 | 0.75 | 1.00 | 1.00 | 1.00 | 1.00 | 1.00 | 1.00 |
| 512  |   |   | 0.00 | 0.26 | 0.43 | 0.74 | 1.00 | 1.00 | 1.00 | 1.00 | 1.00 | 1.00 |
| 1024 |   |   | 0.00 | 0.25 | 0.41 | 0.73 | 1.00 | 1.00 | 1.00 | 1.00 | 1.00 | 1.00 |

Supplementary Figure 18: Estimation of the ratio between the expression values of two genes in bulk RNA-seq as a function of the single molecule capture probability and the size of the cell pool in simulated transcriptomes. A pool of 1000 cells, average of 100,000 mRNAs per cell. Genes were split into groups according to their expression levels (step size of 1 on a  $\log_2$  scale, shown on each axis) and the fraction of gene pairs  $\{A, B\}$  for which  $R_{AB} < 0.5$  was calculated, where

$$R_{AB} = \frac{\frac{\text{FPKM}_A^{pool}}{\text{FPKM}_A^{pool} + \text{FPKM}_B^{pool}}}{\frac{\text{FPKM}_A^{bulk}}{\text{FPKM}_A^{bulk} + \text{FPKM}_B^{bulk}}}$$

and  $\text{FPKM}_A^{bulk} < \text{FPKM}_B^{bulk}$ . Empty cells contain no gene pairs with the indicated expression values.

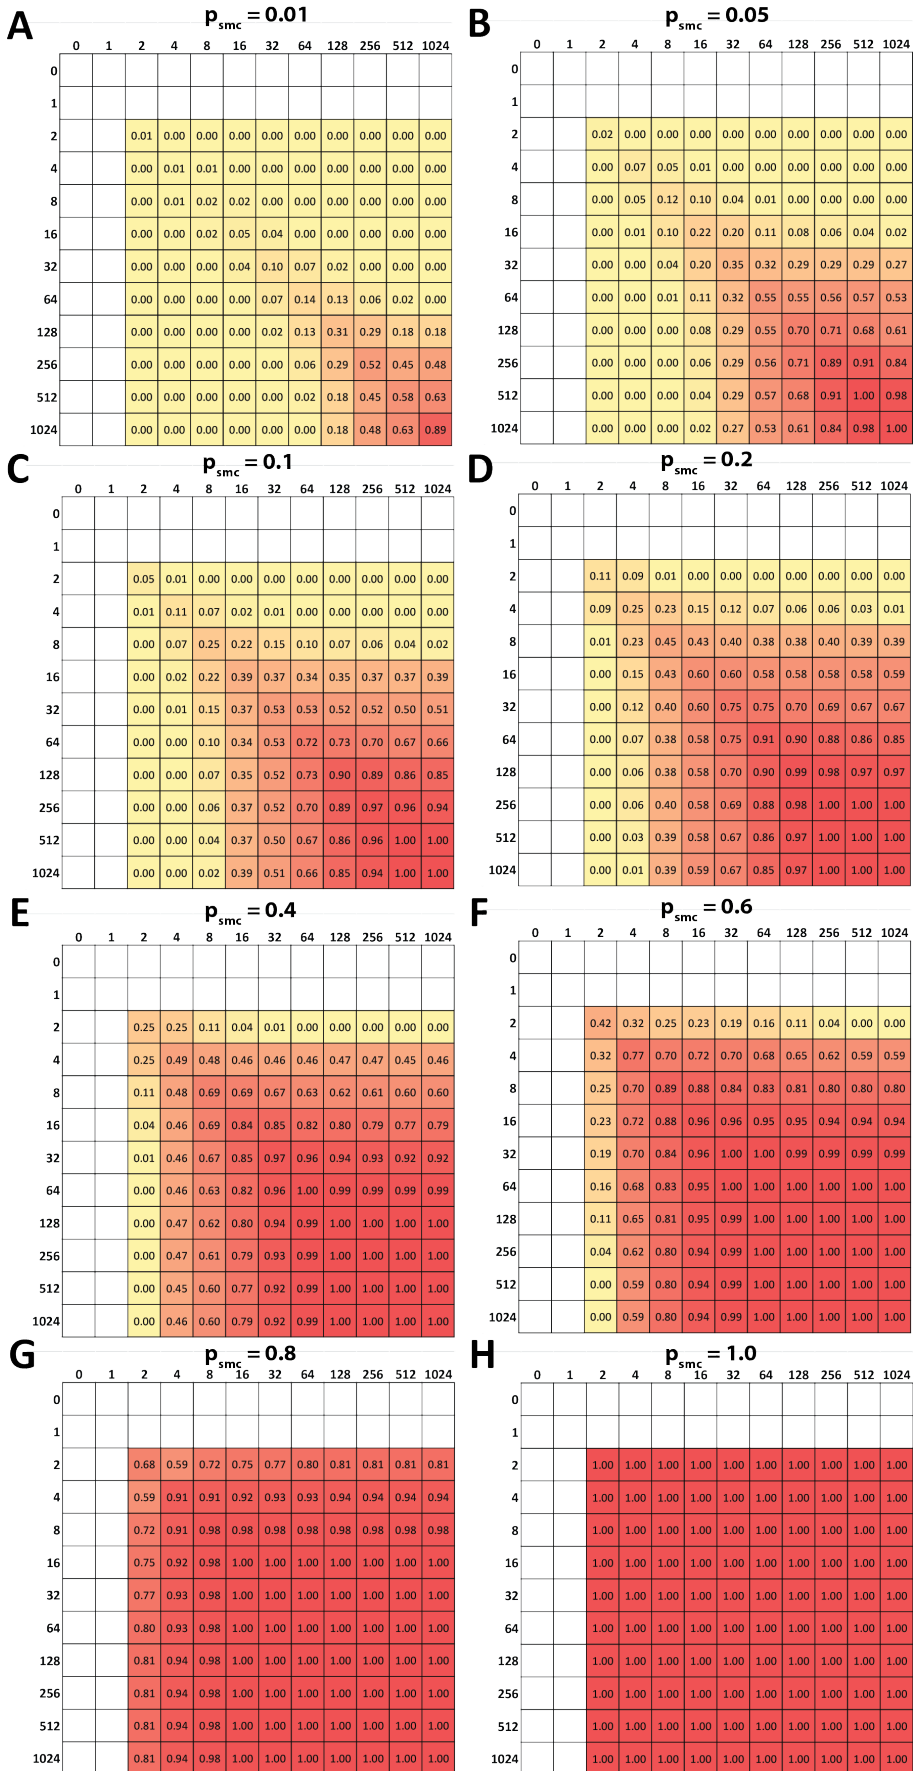

**Supplementary Figure 19: Accuracy of estimation of the ratio between the expression values of two genes in a cell pool as a function of the single molecule capture probability.** A single cell, average of 100,000 mRNAs per cell. Genes were split into groups according to their expression levels (step size of 1 on a  $\log_2$  scale, shown on each axis) and the fraction of gene pairs  $\{A, B\}$  for which  $R_{AB} < 0.5$  was calculated, where

$$R_{AB} = \frac{\frac{FPKM_A^{pool}}{FPKM_A^{pool} + FPKM_B^{pool}}}{\frac{FPKM_A^{bulk}}{FPKM_A^{bulk} + FPKM_B^{bulk}}}$$

and  $FPKM_A^{bulk} < FPKM_B^{bulk}$ . Empty cells contain no gene pairs with the indicated expression values.

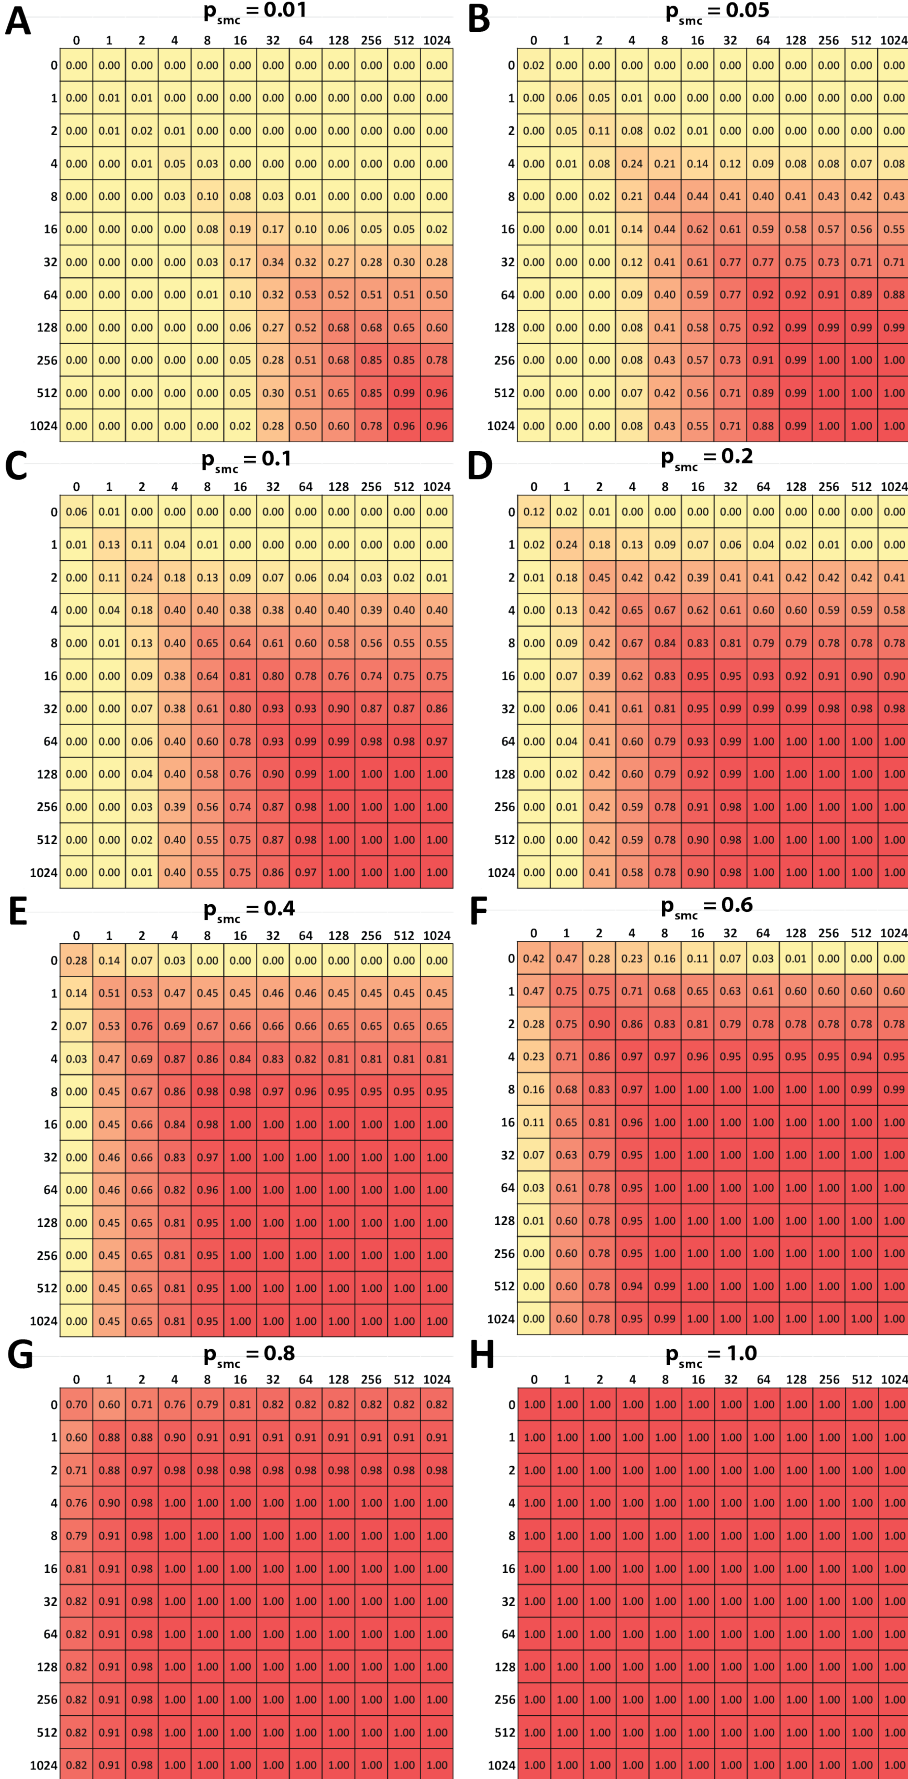

**Supplementary Figure 20: Accuracy of estimation of the ratio between the expression values of two genes in a cell pool as a function of the single molecule capture probability.** A pool of 5 cells, average of 100,000 mRNAs per cell. Genes were split into groups according to their expression levels (step size of 1 on a  $\log_2$  scale, shown on each axis) and the fraction of gene pairs  $\{A, B\}$  for which  $R_{AB} < 0.5$  was calculated, where

$$R_{AB} = \frac{\text{FPKM}_A^{\text{pool}}}{\text{FPKM}_A^{\text{pool}} + \text{FPKM}_B^{\text{pool}}} \frac{\text{FPKM}_A^{\text{bulk}} + \text{FPKM}_B^{\text{bulk}}}{\text{FPKM}_A^{\text{bulk}} + \text{FPKM}_B^{\text{bulk}}}$$

and  $\text{FPKM}_A^{\text{bulk}} < \text{FPKM}_B^{\text{bulk}}$ . Empty cells contain no gene pairs with the indicated expression values.

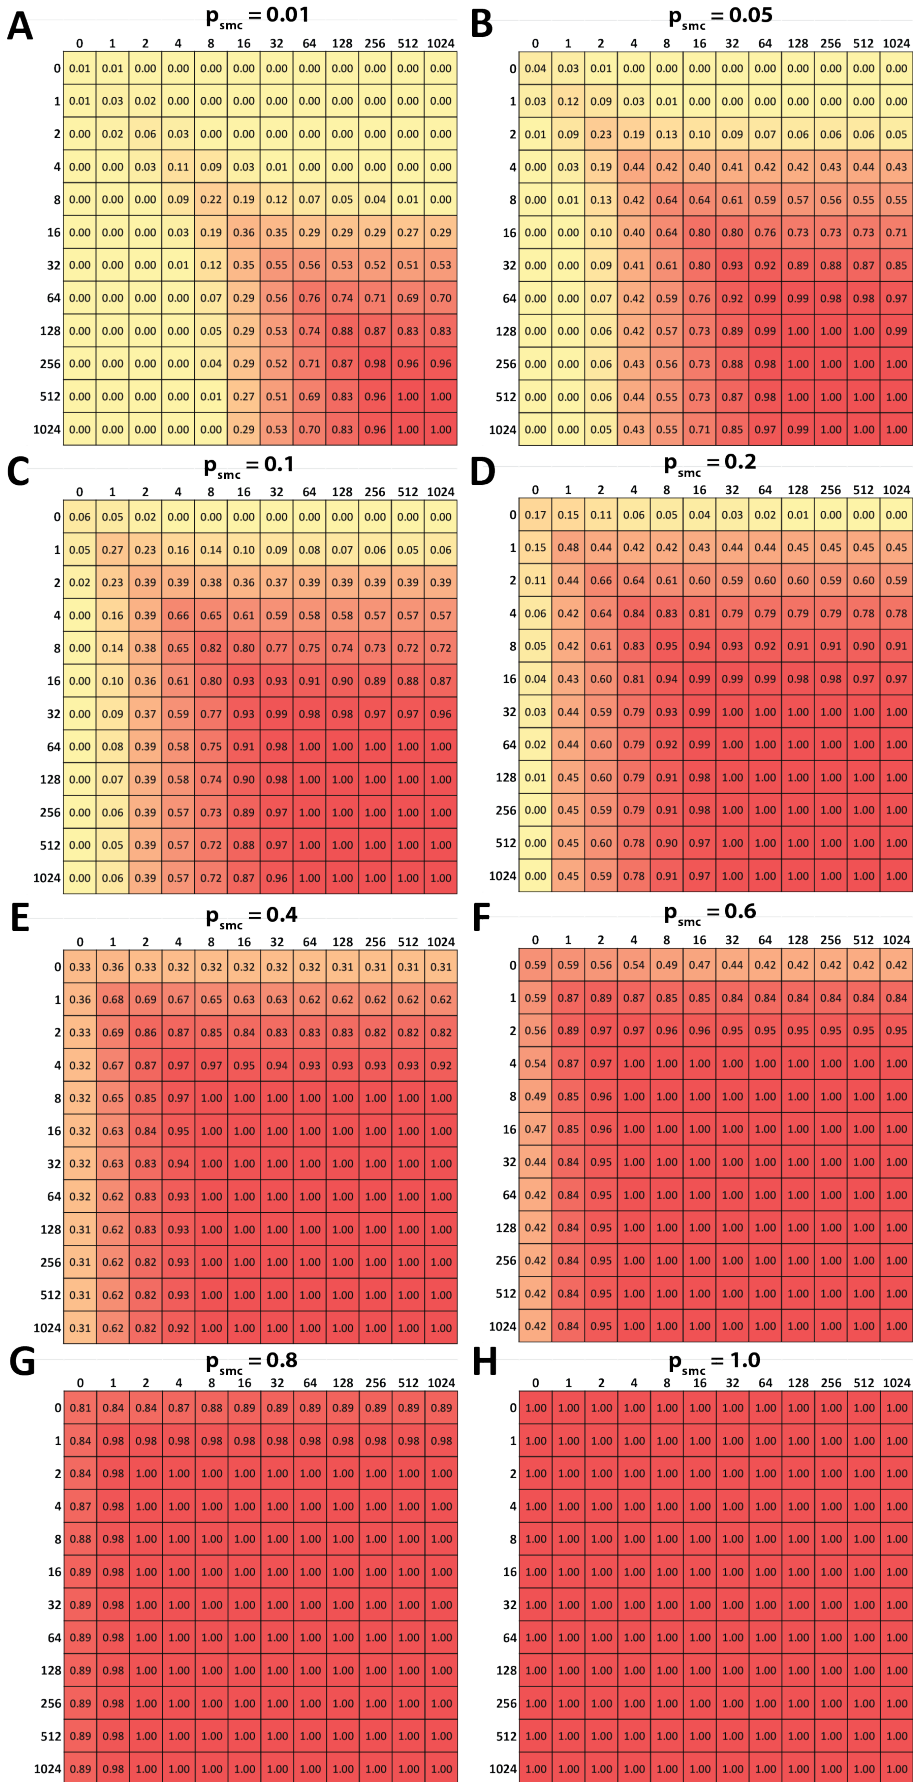

**Supplementary Figure 21: Accuracy of estimation of the ratio between the expression values of two genes in a cell pool as a function of the single molecule capture probability.** A pool of 10 cells, average of 100,000 mRNAs per cell. Genes were split into groups according to their expression levels (step size of 1 on a  $\log_2$  scale, shown on each axis) and the fraction of gene pairs  $\{A, B\}$  for which  $R_{AB} < 0.5$  was calculated, where

$$R_{AB} = \frac{\text{FPKM}_A^{pool} + \text{FPKM}_B^{pool}}{\text{FPKM}_A^{bulk} + \text{FPKM}_B^{bulk}}$$

and  $\text{FPKM}_A^{bulk} < \text{FPKM}_B^{bulk}$ . Empty cells contain no gene pairs with the indicated expression values.

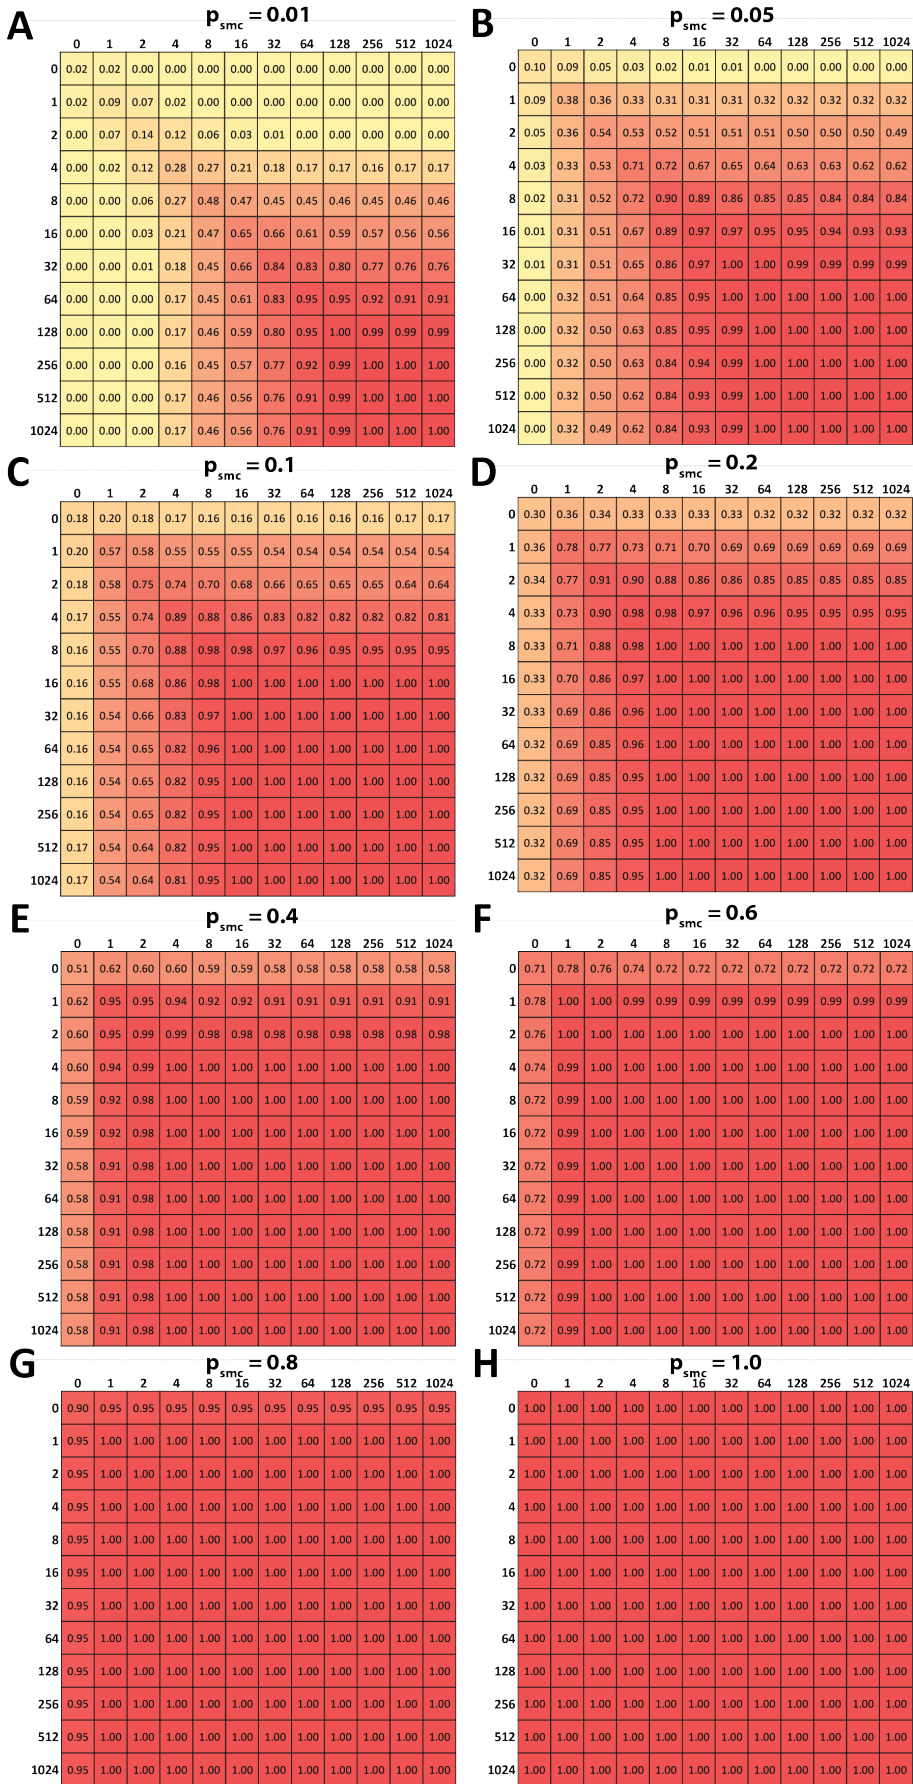

**Supplementary Figure 22: Accuracy of estimation of the ratio between the expression values of two genes in a cell pool as a function of the single molecule capture probability.** A pool of 30 cells, average of 100,000 mRNAs per cell. Genes were split into groups according to their expression levels (step size of 1 on a  $\log_2$  scale, shown on each axis) and the fraction of gene pairs  $\{A, B\}$  for which  $R_{AB} < 0.5$  was calculated, where

$$R_{AB} = \frac{\text{FPKM}_A^{pool}}{\text{FPKM}_A^{pool} + \text{FPKM}_B^{pool}} \frac{\text{FPKM}_A^{bulk} + \text{FPKM}_B^{bulk}}{\text{FPKM}_A^{bulk} + \text{FPKM}_B^{bulk}}$$

and  $\text{FPKM}_A^{bulk} < \text{FPKM}_B^{bulk}$ . Empty cells contain no gene pairs with the indicated expression values.



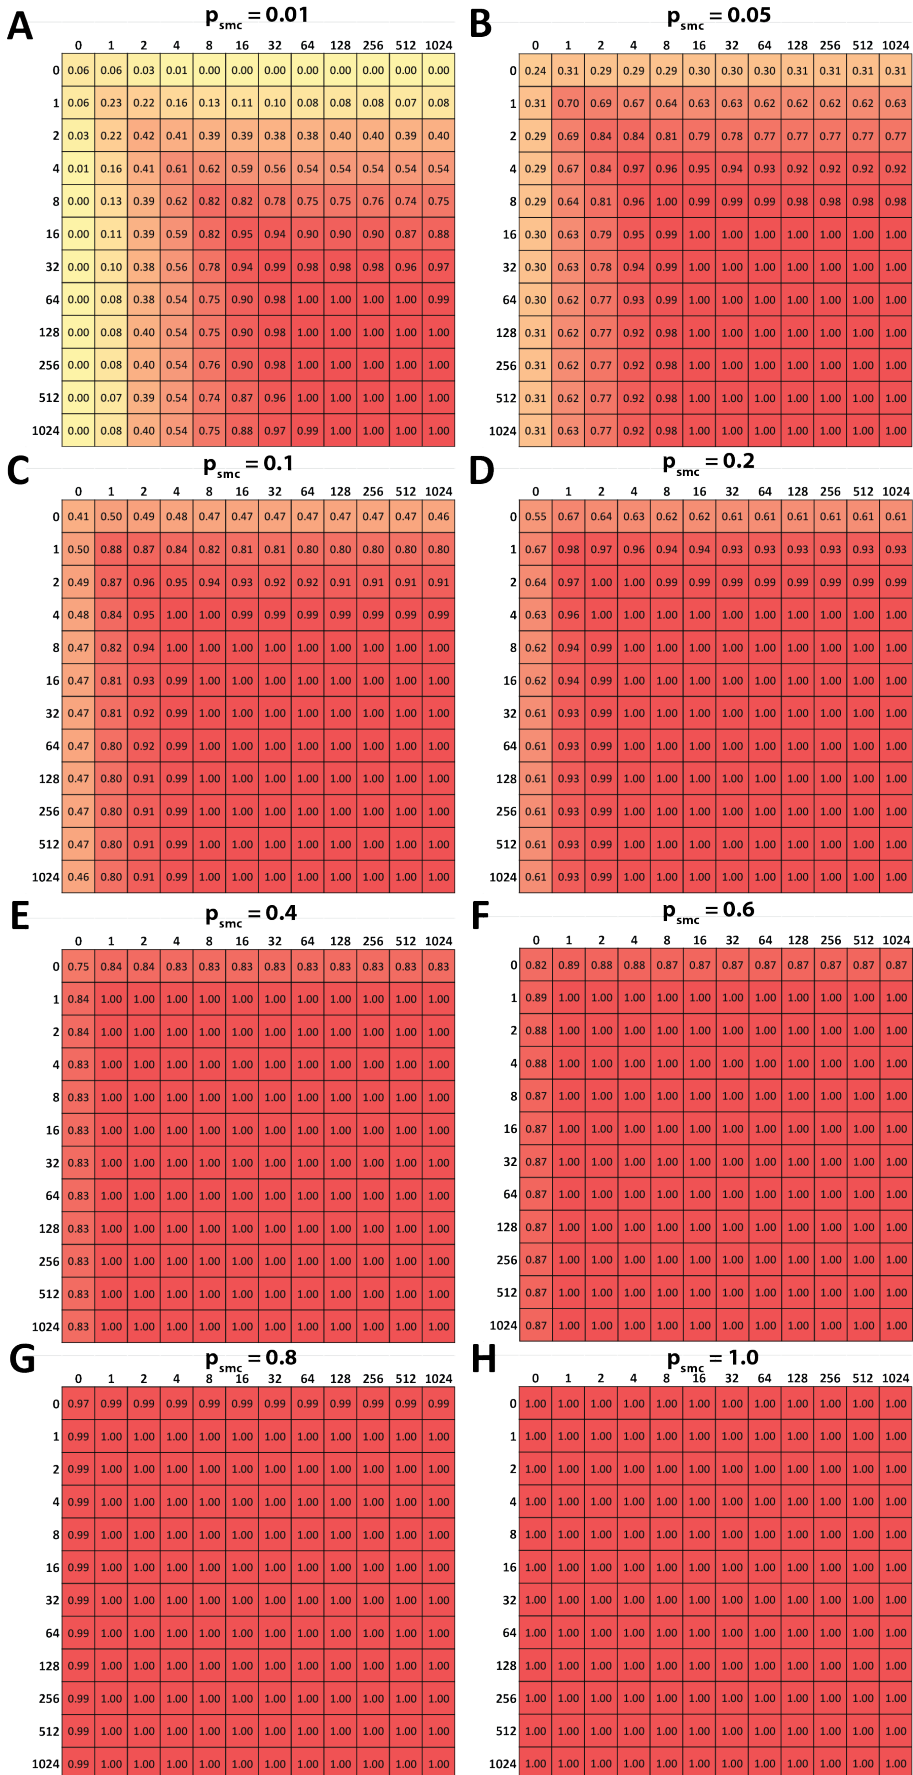

Supplementary Figure 24: Accuracy of estimation of the ratio between the expression values of two genes in a cell pool as a function of the single molecule capture probability. A pool of 100 cells, average of 100,000 mRNAs per cell. Genes were split into groups according to their expression levels (step size of 1 on a  $\log_2$  scale, shown on each axis) and the fraction of gene pairs  $\{A, B\}$  for which  $R_{AB} < 0.5$  was calculated, where

$$R_{AB} = \frac{\frac{\text{FPKM}_A^{\text{pool}}}{\text{FPKM}_A^{\text{pool}} + \text{FPKM}_B^{\text{pool}}}{\text{FPKM}_A^{\text{bulk}} + \text{FPKM}_B^{\text{bulk}}}$$

and  $\text{FPKM}_A^{\text{bulk}} < \text{FPKM}_B^{\text{bulk}}$ . Empty cells contain no gene pairs with the indicated expression values.





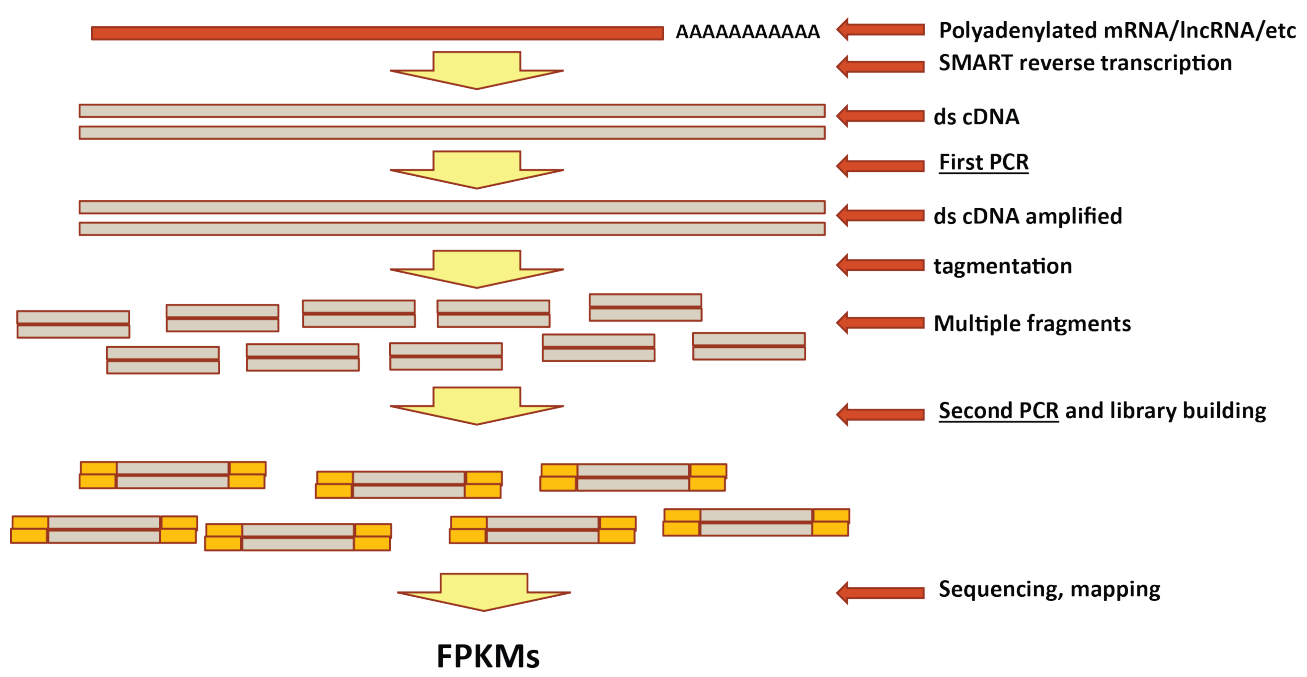

Supplementary Figure 26: Outline of the single-cell SMART-seq RNA-seq library generation workflow.

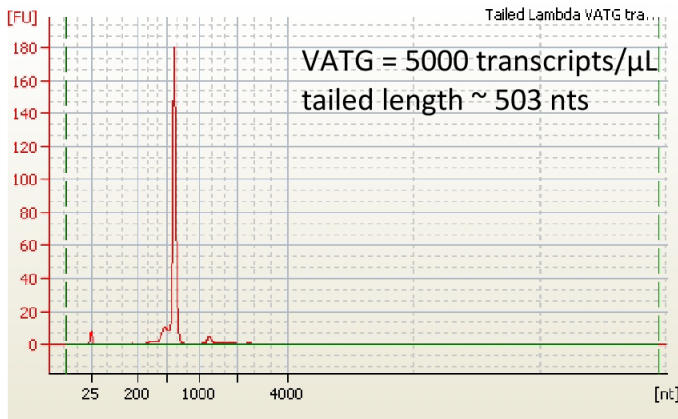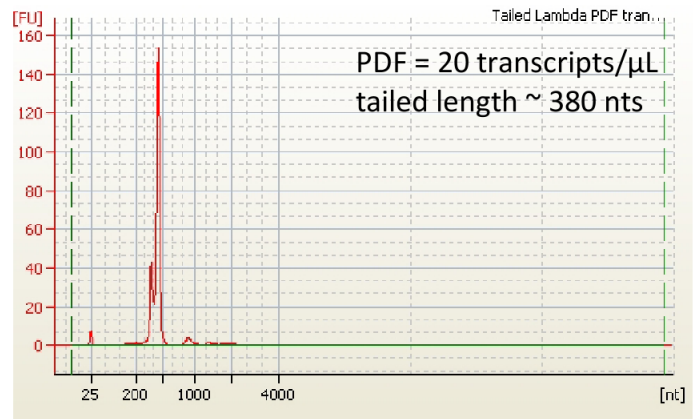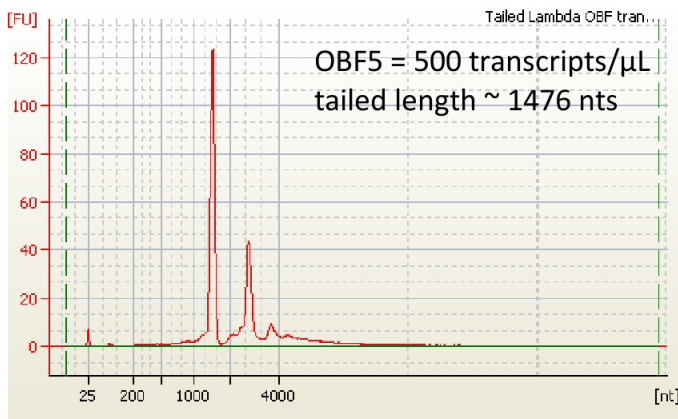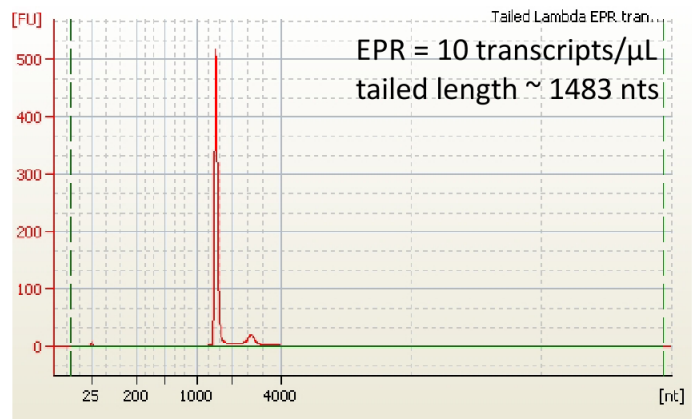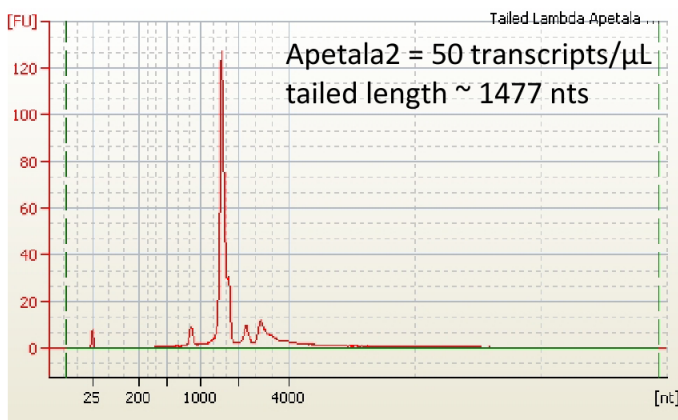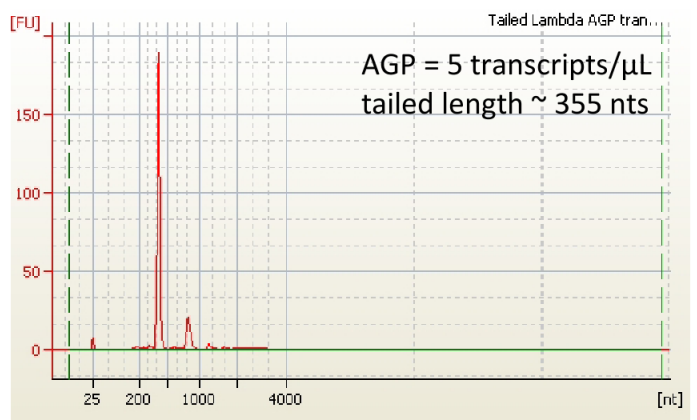

**Supplementary Figure 27: Bioanalyzer plots for the transcript quantitation spike-in controls.** The nominal transcript length (cloned sequence plus the polyA region) and the number of transcripts included in the cocktail of standards are indicated. The plots indicate that the majority of transcription product is the expected length.

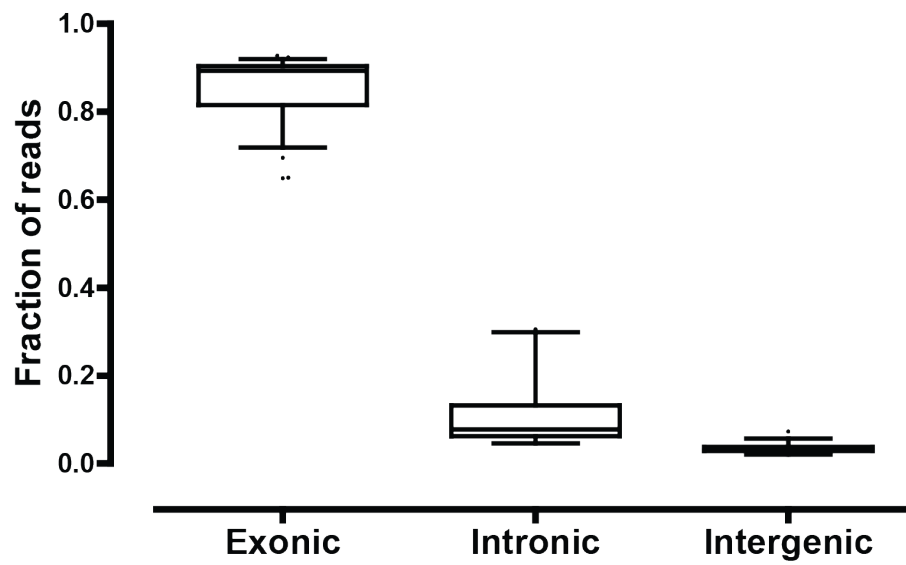

**Supplementary Figure 28: Efficiency of enrichment for polydenylated messages.** Shown is the fraction of reads mapping to exons, introns or intergenic space (GENCODE V13 annotation).

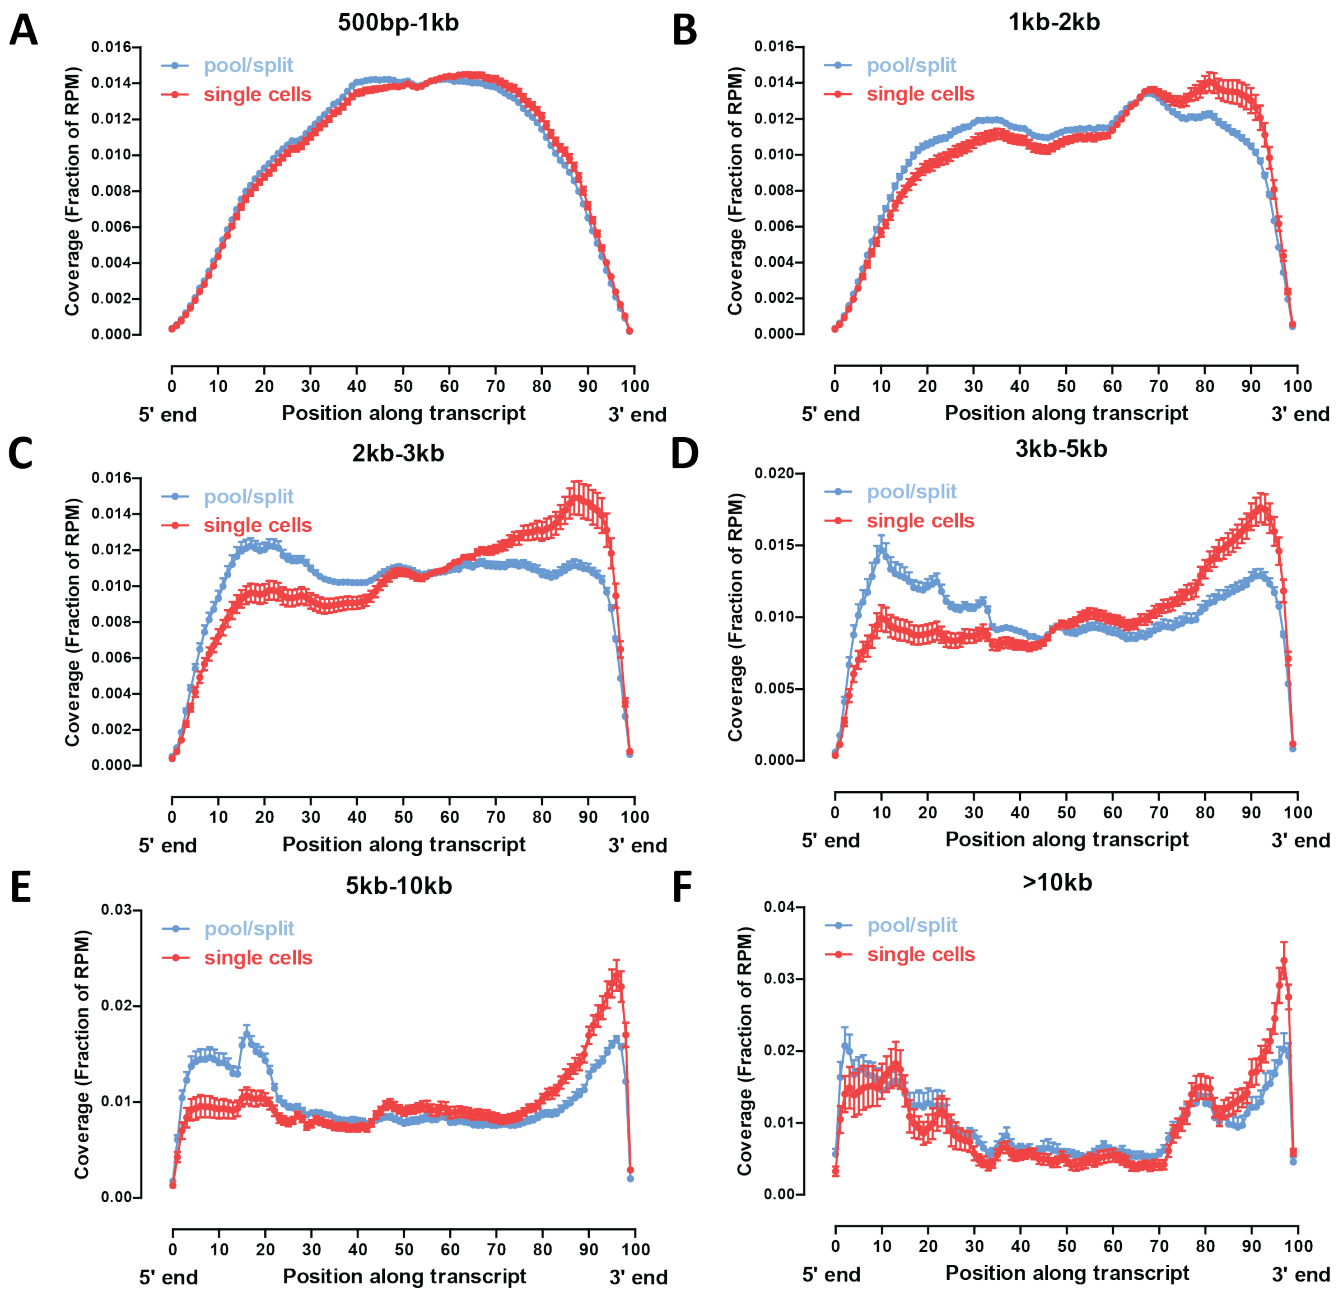

**Supplementary Figure 29: Uniformity of transcript coverage as a function of transcript length.** Shown is the average coverage along the length of an mRNA for single cells and pool/split experiments. Only mRNAs with a single annotated isoform in the refSeq annotation set and within the indicated length limits were included.

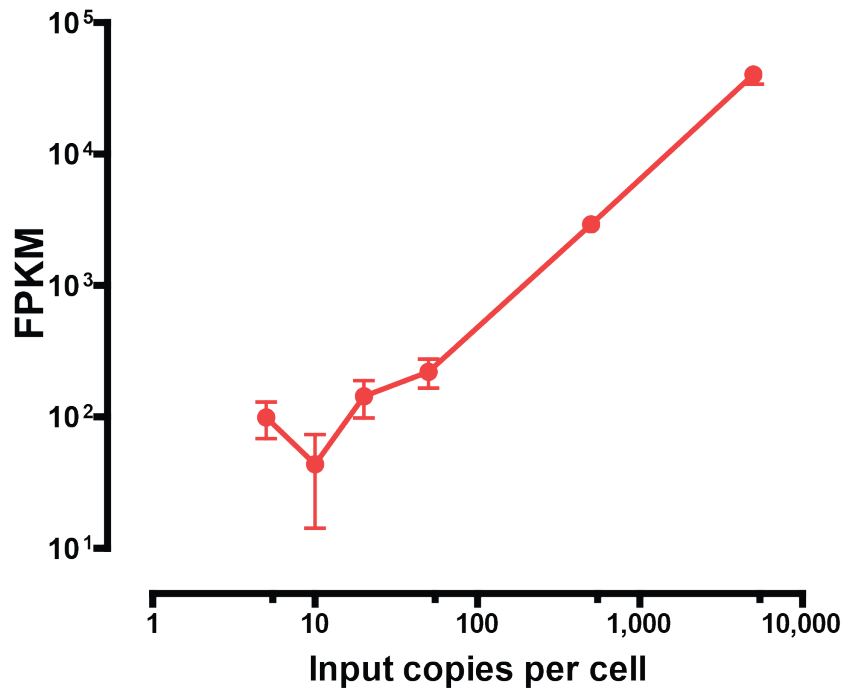

Supplementary Figure 30: Correspondence between initial spike-in amounts and spike abundance in sequenced libraries as measured in FPKMs. Error bars represent the standard error of the mean.

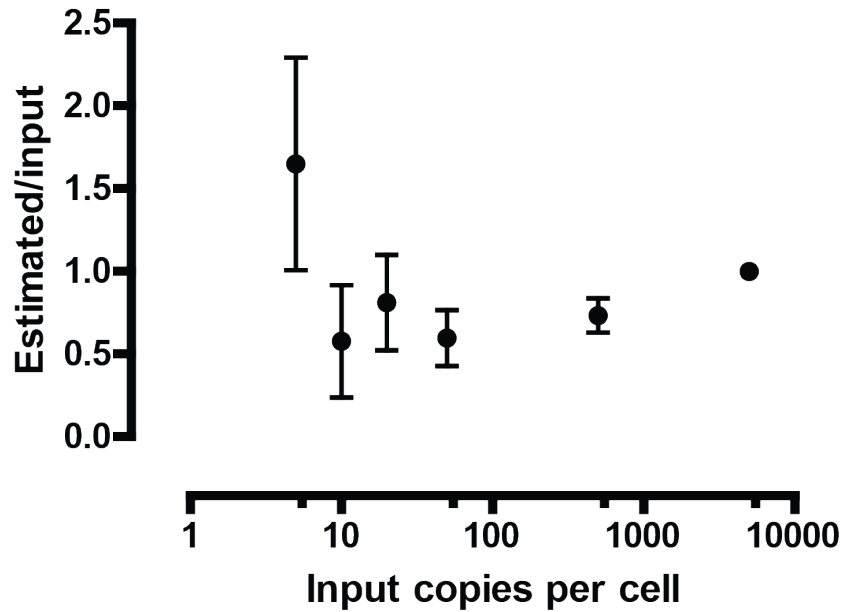

Supplementary Figure 31: Stability of copies per cell estimation. Spike-in sequences of known abundance (Supplementary Table 2) were added to each reaction prior to library building. A linear regression calibration was derived based on RPKM/FPKM values calculated for each. Shown is the average ratio of estimated copies per cell and the actual spiked in copies per cell for these spike sequences. Error bars represent the standard error of the mean.

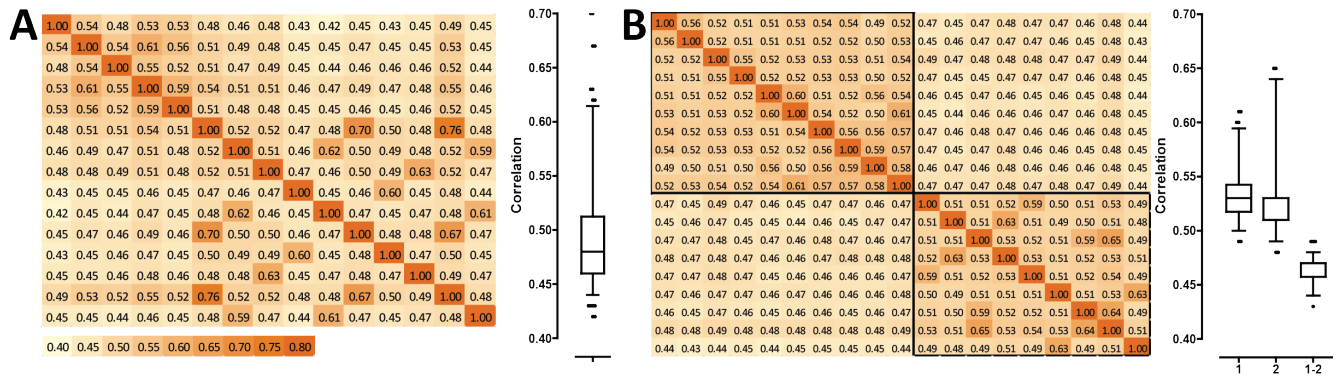

Supplementary Figure 32: Spearman correlations between single cell and pool/split libraries. (A) Single cells; (B) Pool/splits.

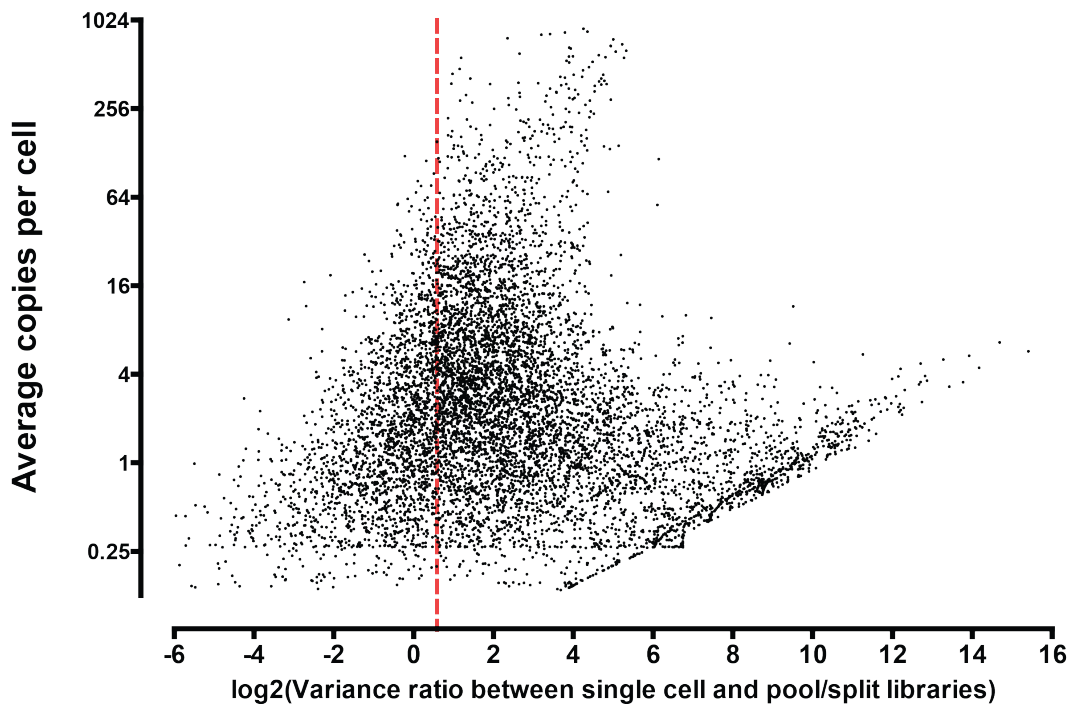

Supplementary Figure 33: Ratio of the variance of single cell and pool/split libraries vs. average estimated number of mRNA molecules. The vertical line corresponds to a variance ratio of 1.5. Genes with a variance ratio higher than 1.5 were retained for network construction. Most genes with a lower ratio (and correspondingly high variance in pool/split libraries) have a relatively low average estimated number of mRNA molecules per cell.

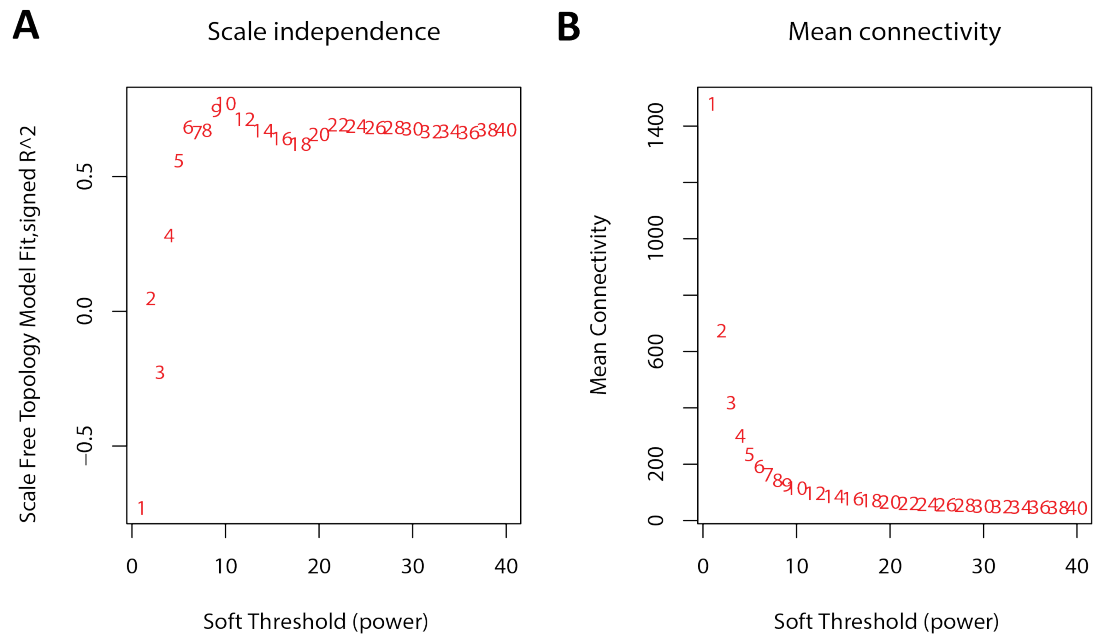

**Supplementary Figure 34: Optimization of the soft threshold parameter for constructing weighted correlation gene expression network.** (A) Scale independence (B) Mean connectivity. A value of  $\beta = 6$  was used for network construction.

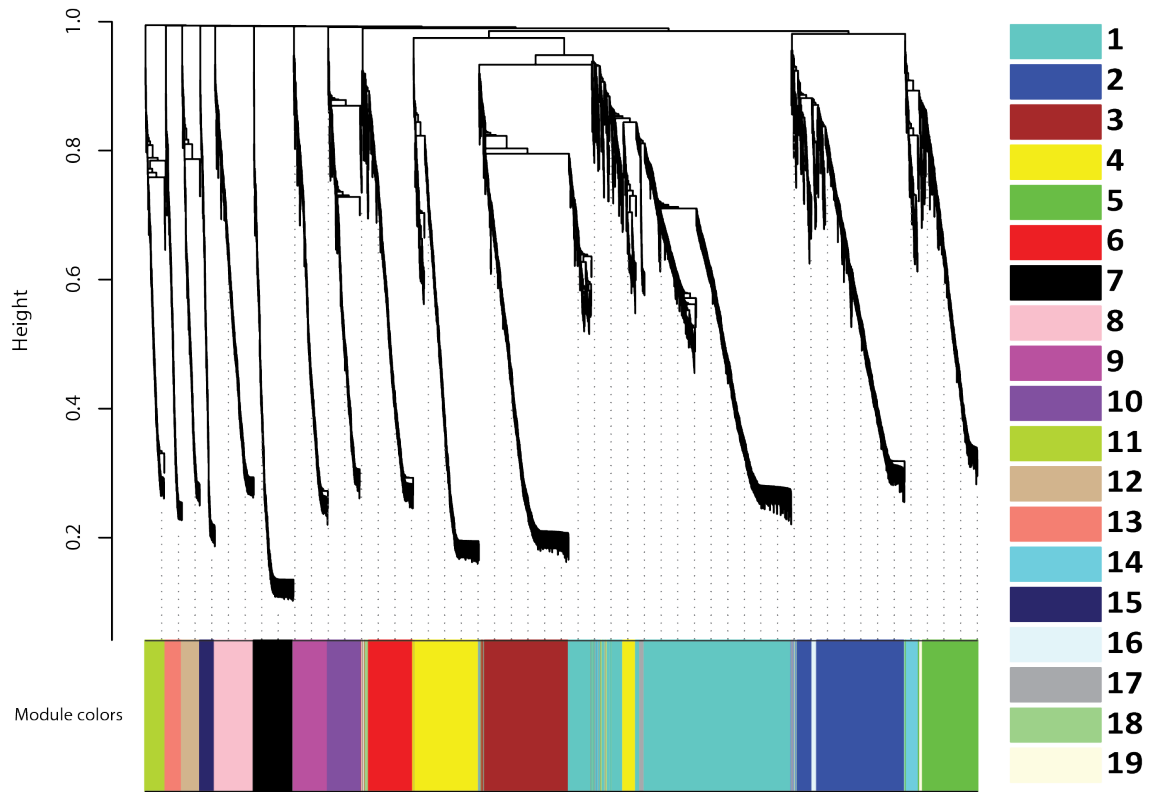

**Supplementary Figure 35: Cluster dendrogram of gene coexpression modules derived from single GM12878 cells..**

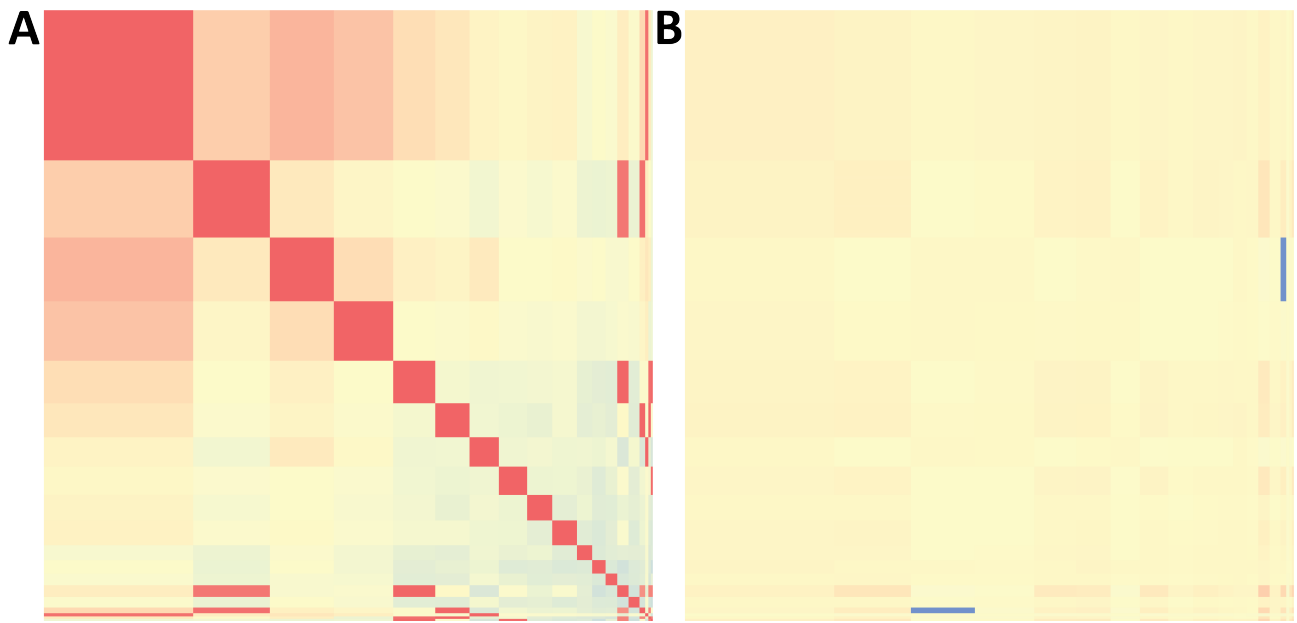

**Supplementary Figure 36: Average correlation within and between coexpression modules in single cells and pool/splits.** Modules are sorted by decreasing size. (A) Single cells. (B) Pool/splits

---

**Supplementary Figure 37 (following page): Allele-biased expression at the single-cell level.** (A,B and C) Correlation between allele bias between 10ng bulk RNA replicates (A), between two individual single cells (B) and between two pool/split libraries (C). Shown is the maternal fraction of reads for genes with at least 15 reads covering heterozygous positions for 10ng libraries and for genes with at least 10 reads covering heterozygous positions and expressed at more than 10 copies per cell for single cells and pool/splits. (D). Distribution of allele bias in bulk RNA samples ( $\geq 15$  reads covering positions). (E and F). Distribution of allele bias as a function of the read and copies threshold in single cell (E) and pool/split (F) libraries.



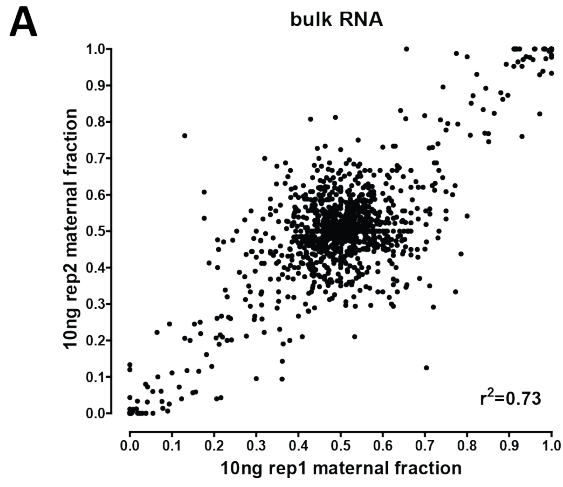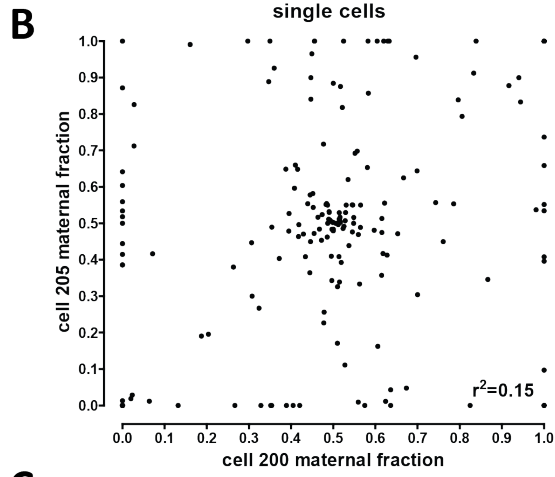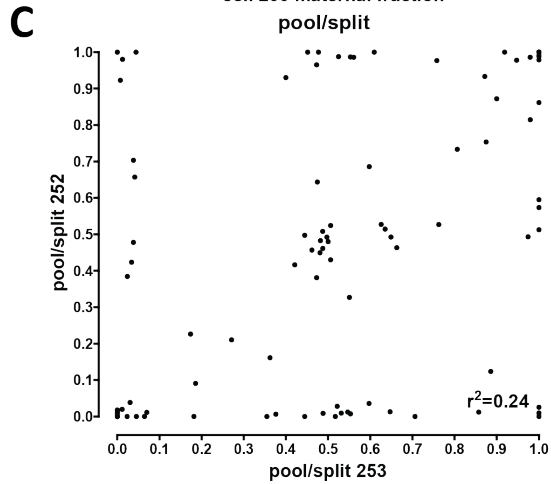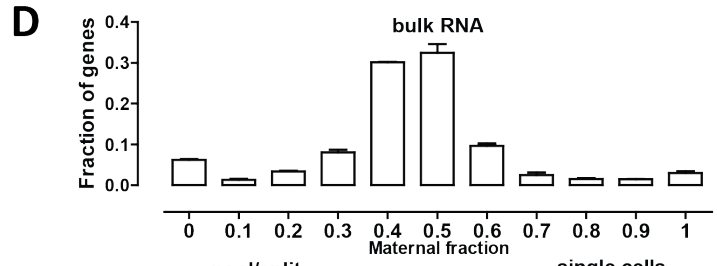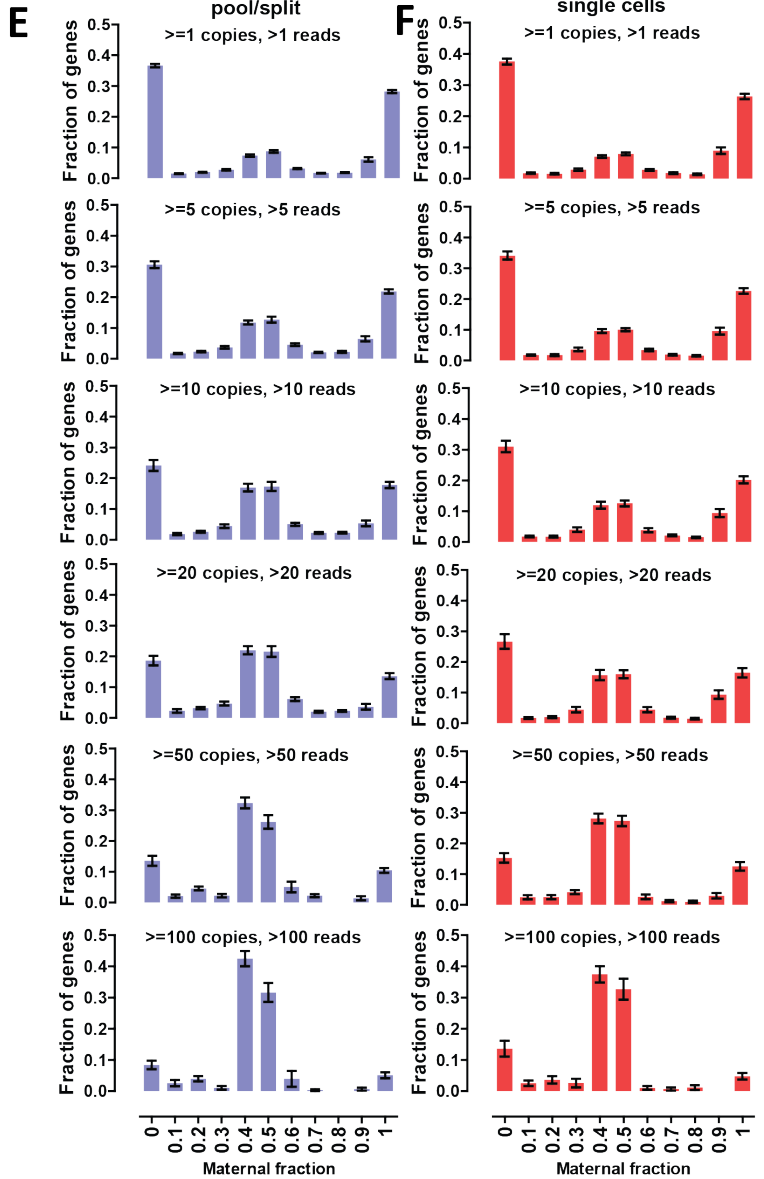

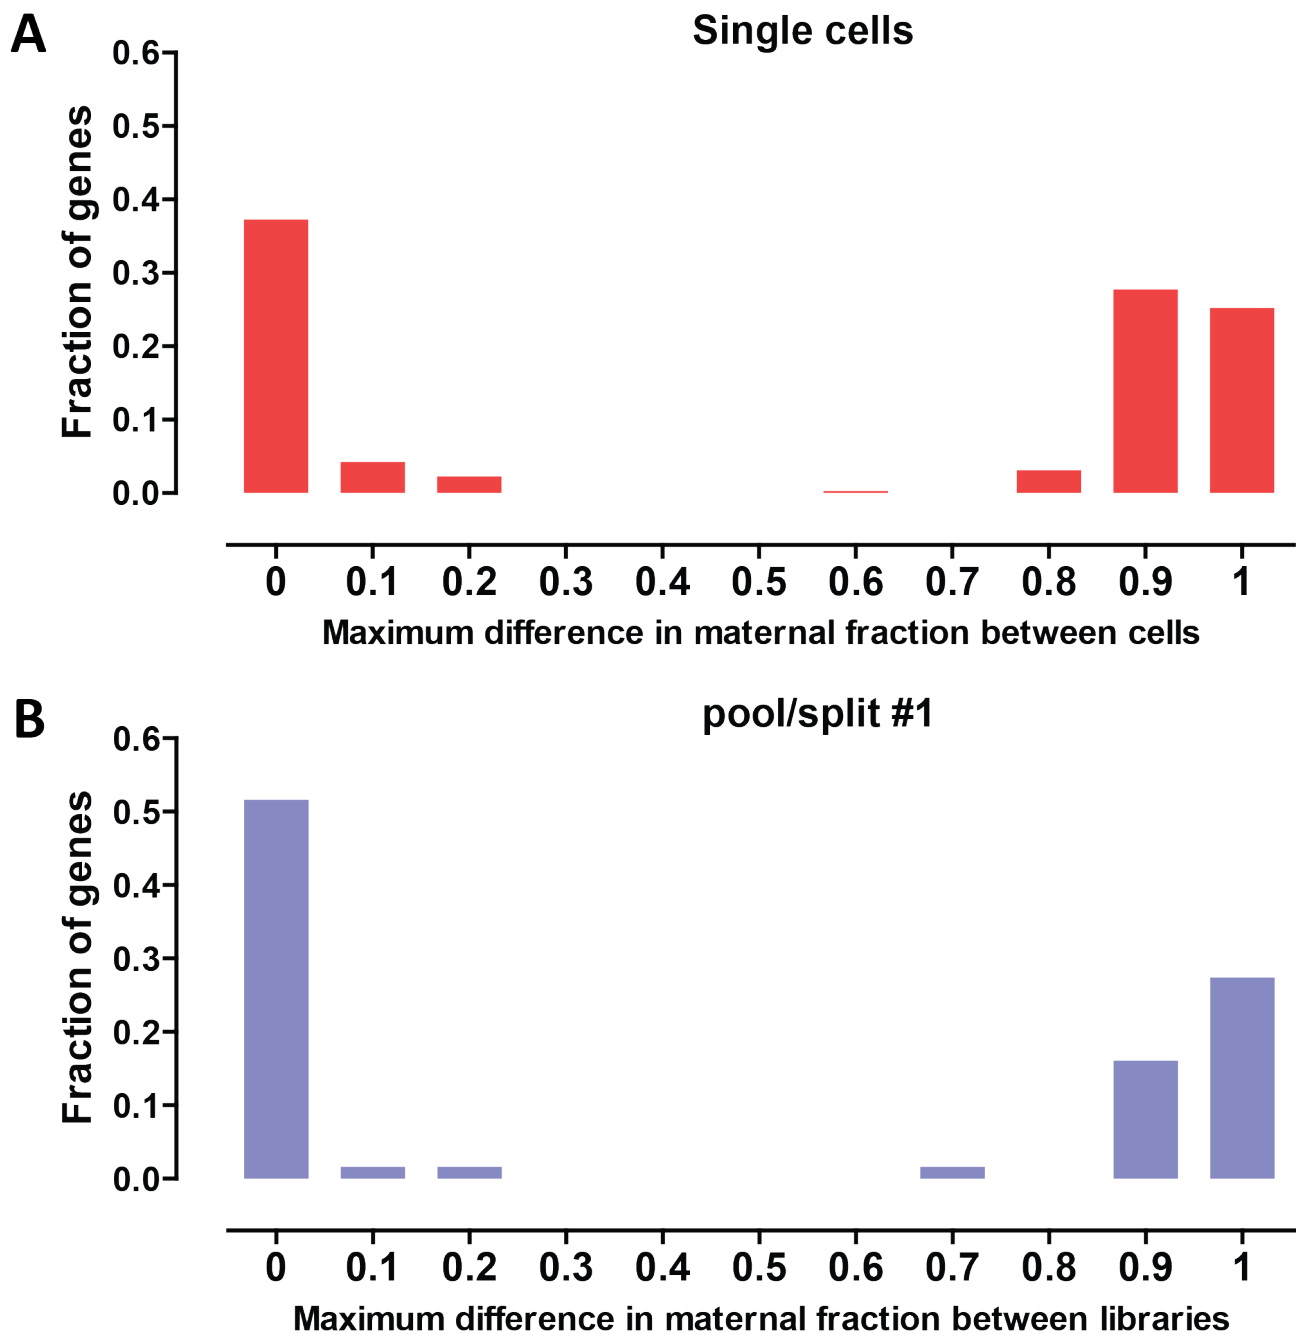

Supplementary Figure 38: Changes in allele expression bias between individual cells and between individual libraries in pool/split experiment 1. Shown is the maximum difference between the maternal fraction of reads in single-cells (A) and the pool/split (B). Only gene/library pairs for which the  $\psi$  score passed all three tests for statistical significance of bias towards one splice (described in Methods) were included

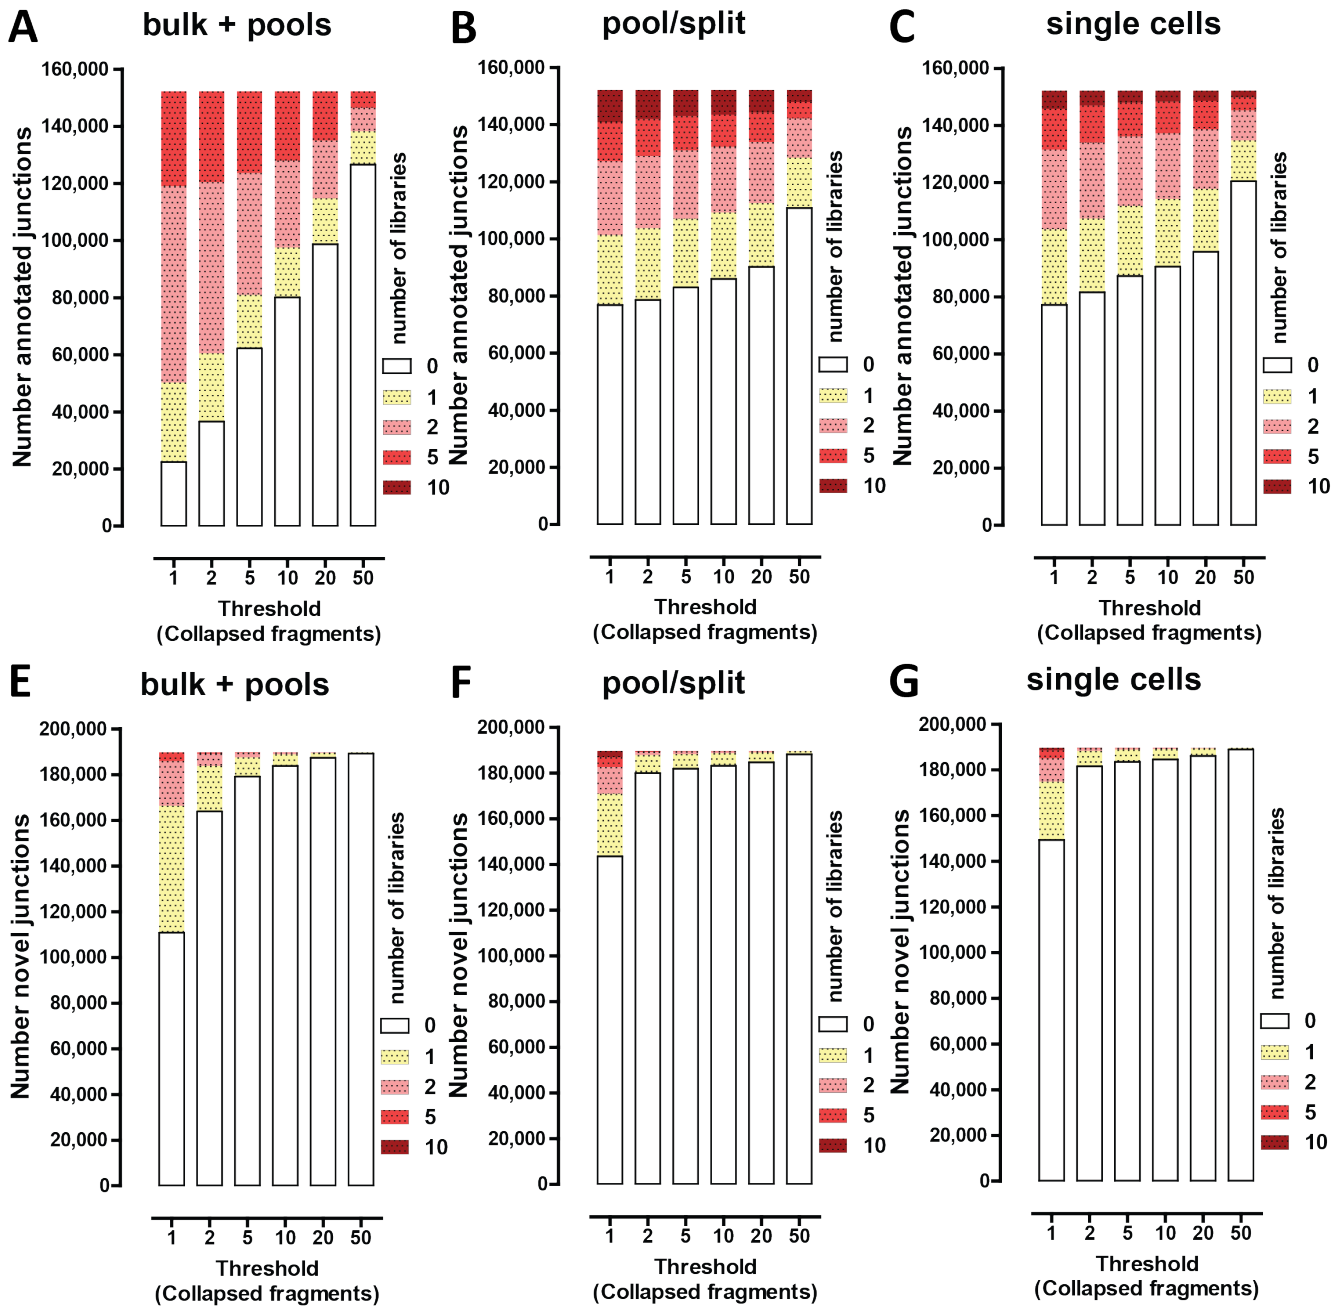

**Supplementary Figure 39: Splice junctions detection.** The total number of annotated or novel junctions in all libraries is included in each plot and junctions that are not detected in each group of experiments are represented by a white bar. (A, B and C) Annotated junctions in bulk and pool libraries (A), pool/split experiments (B) and single cells (C). (D, E and F) Novel junctions in bulk and pool libraries (D), pool/split experiments (E) and single cells (F). Shown are all junctions detected in pools, pool/splits or single cells; when a junction is detected in 0 libraries, only the libraries in the indicated group are referred to.

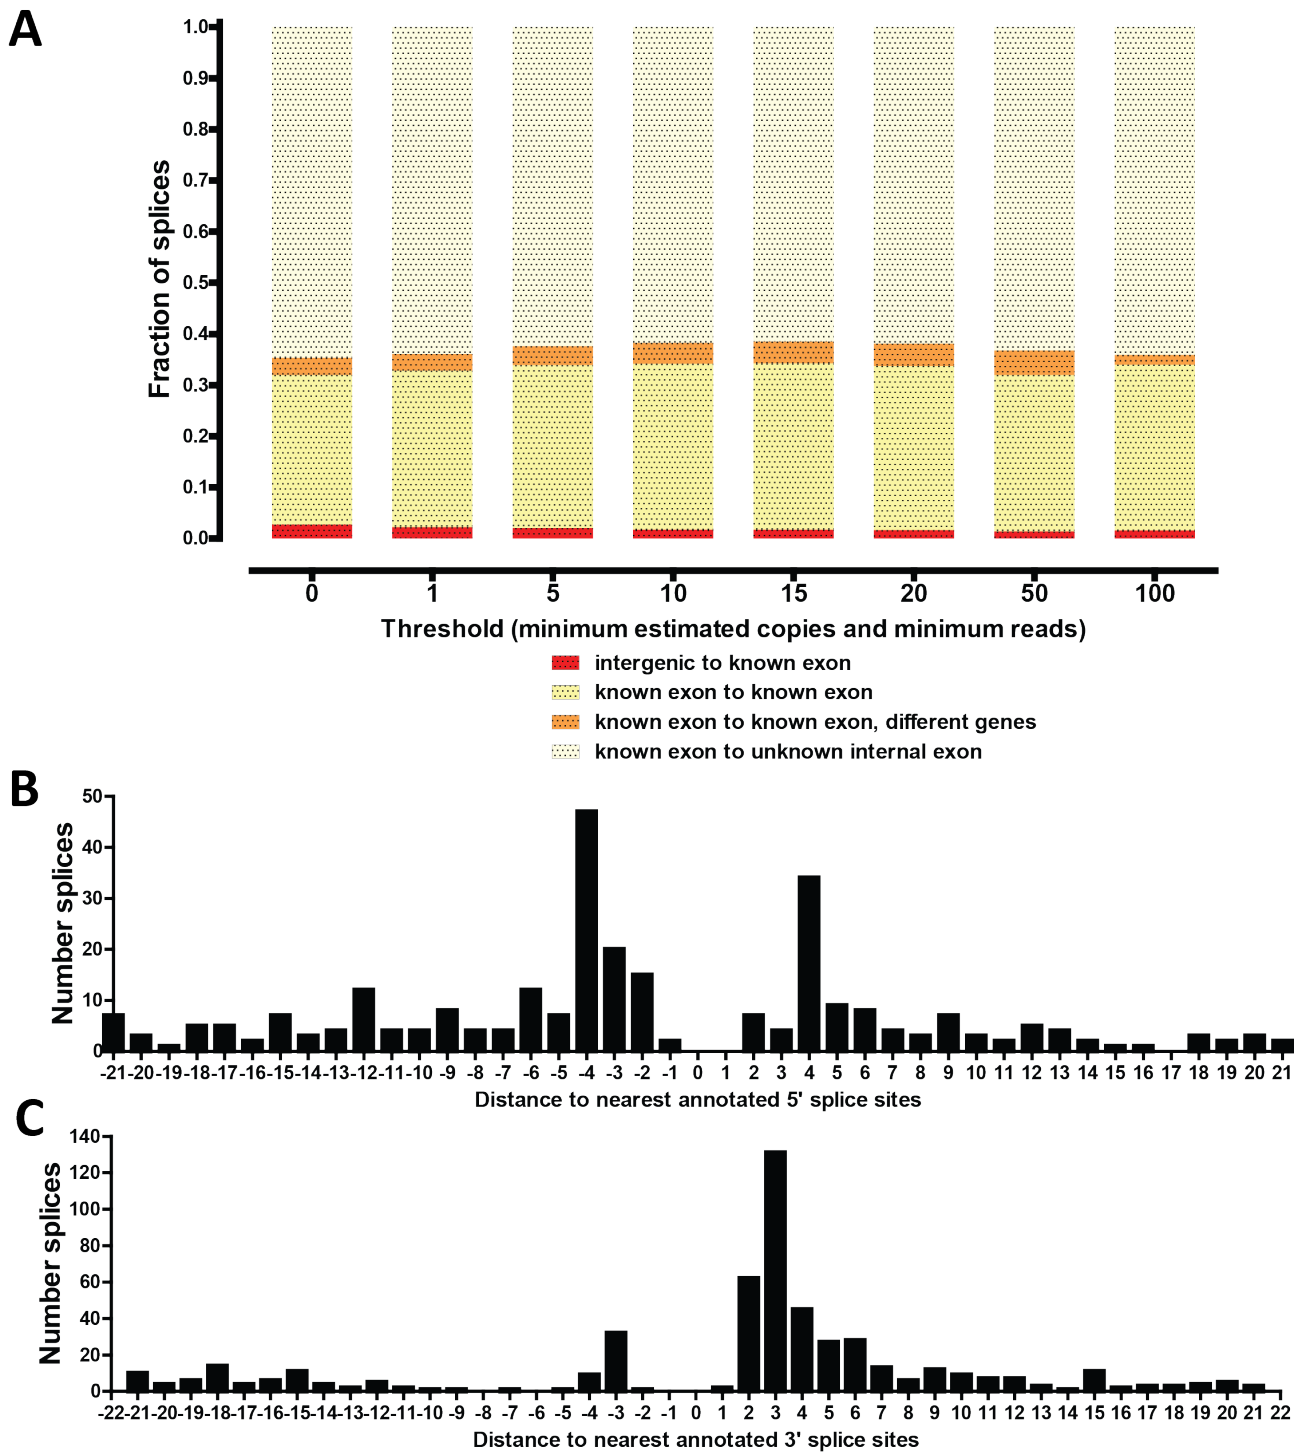

**Supplementary Figure 40: Relationship of novel splice junctions to annotation.** (A) Relation to annotated exons. The detection threshold (in both estimated number of copies and reads mapping to heterozygous positions) was varied as shown and the fraction of junctions belonging to each class was calculated. (B) Distance of the donor site to the nearest annotated 5' splice site. (C) Distance of the acceptor site to the nearest annotated 3' splice sites. All detected junctions were included in (B) and (C).

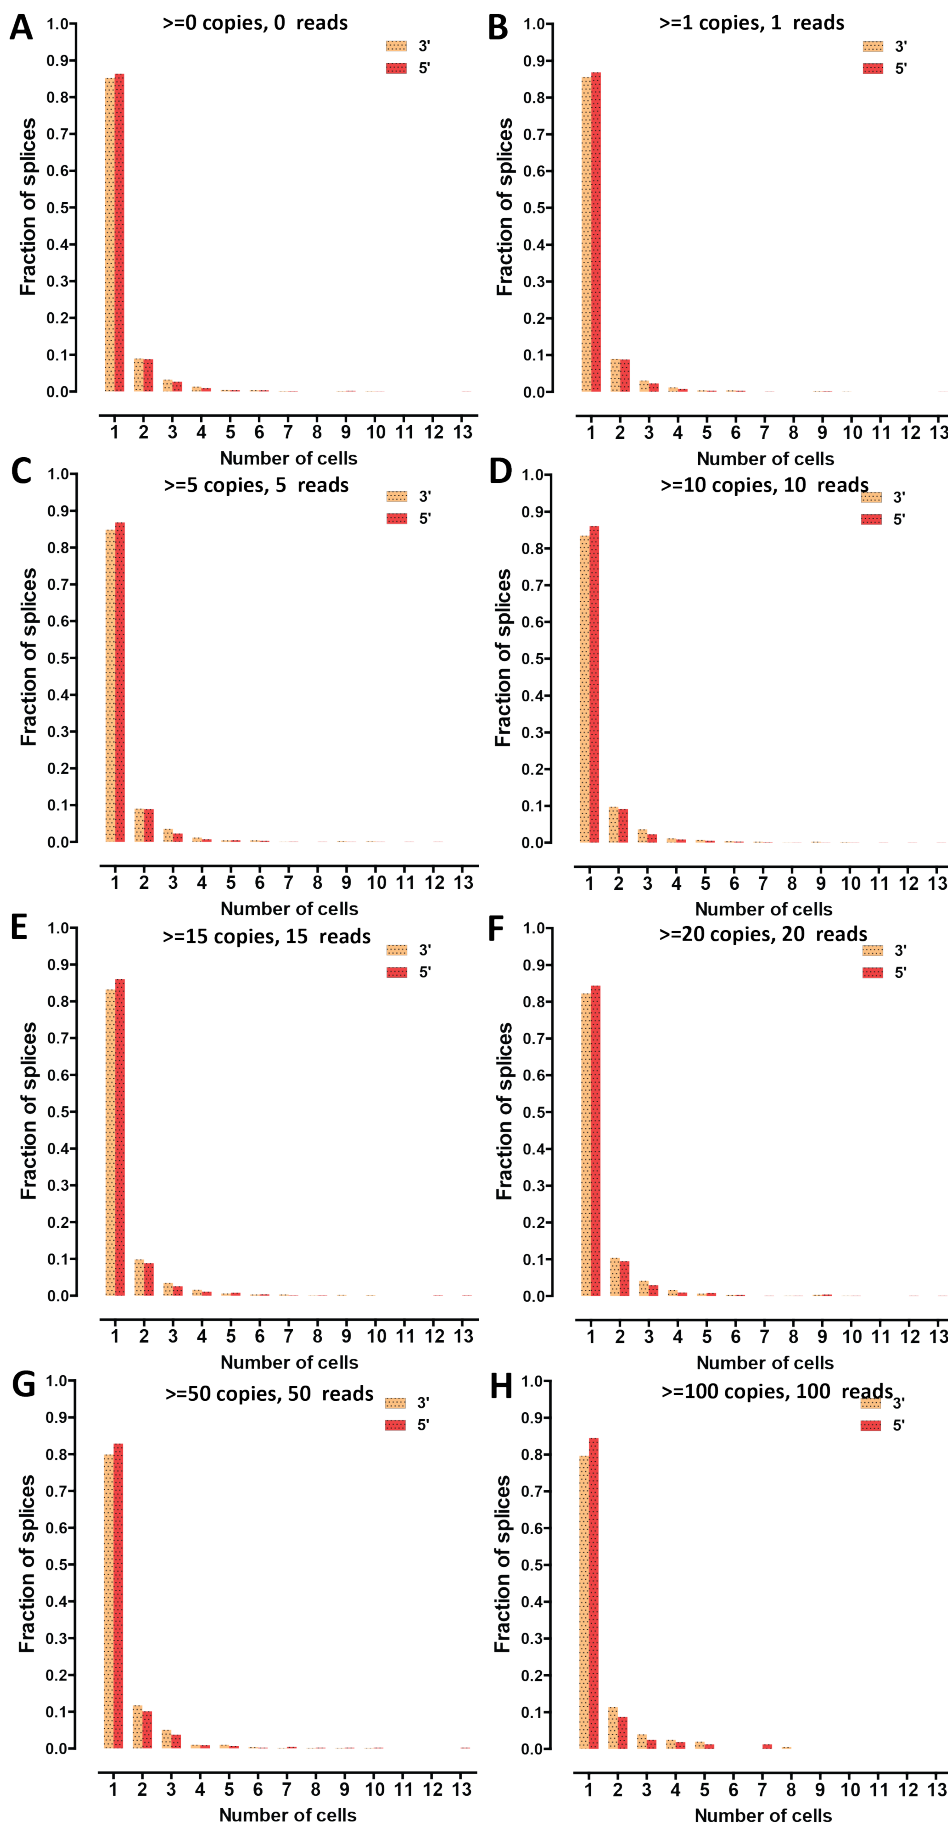

**Supplementary Figure 41:** Number of cells in which a novel junctions is detected. The detection threshold (in both estimated number of copies and reads mapping to heterozygous positions) was varied as shown and the fraction of splices detected in a give number of cells plotted.

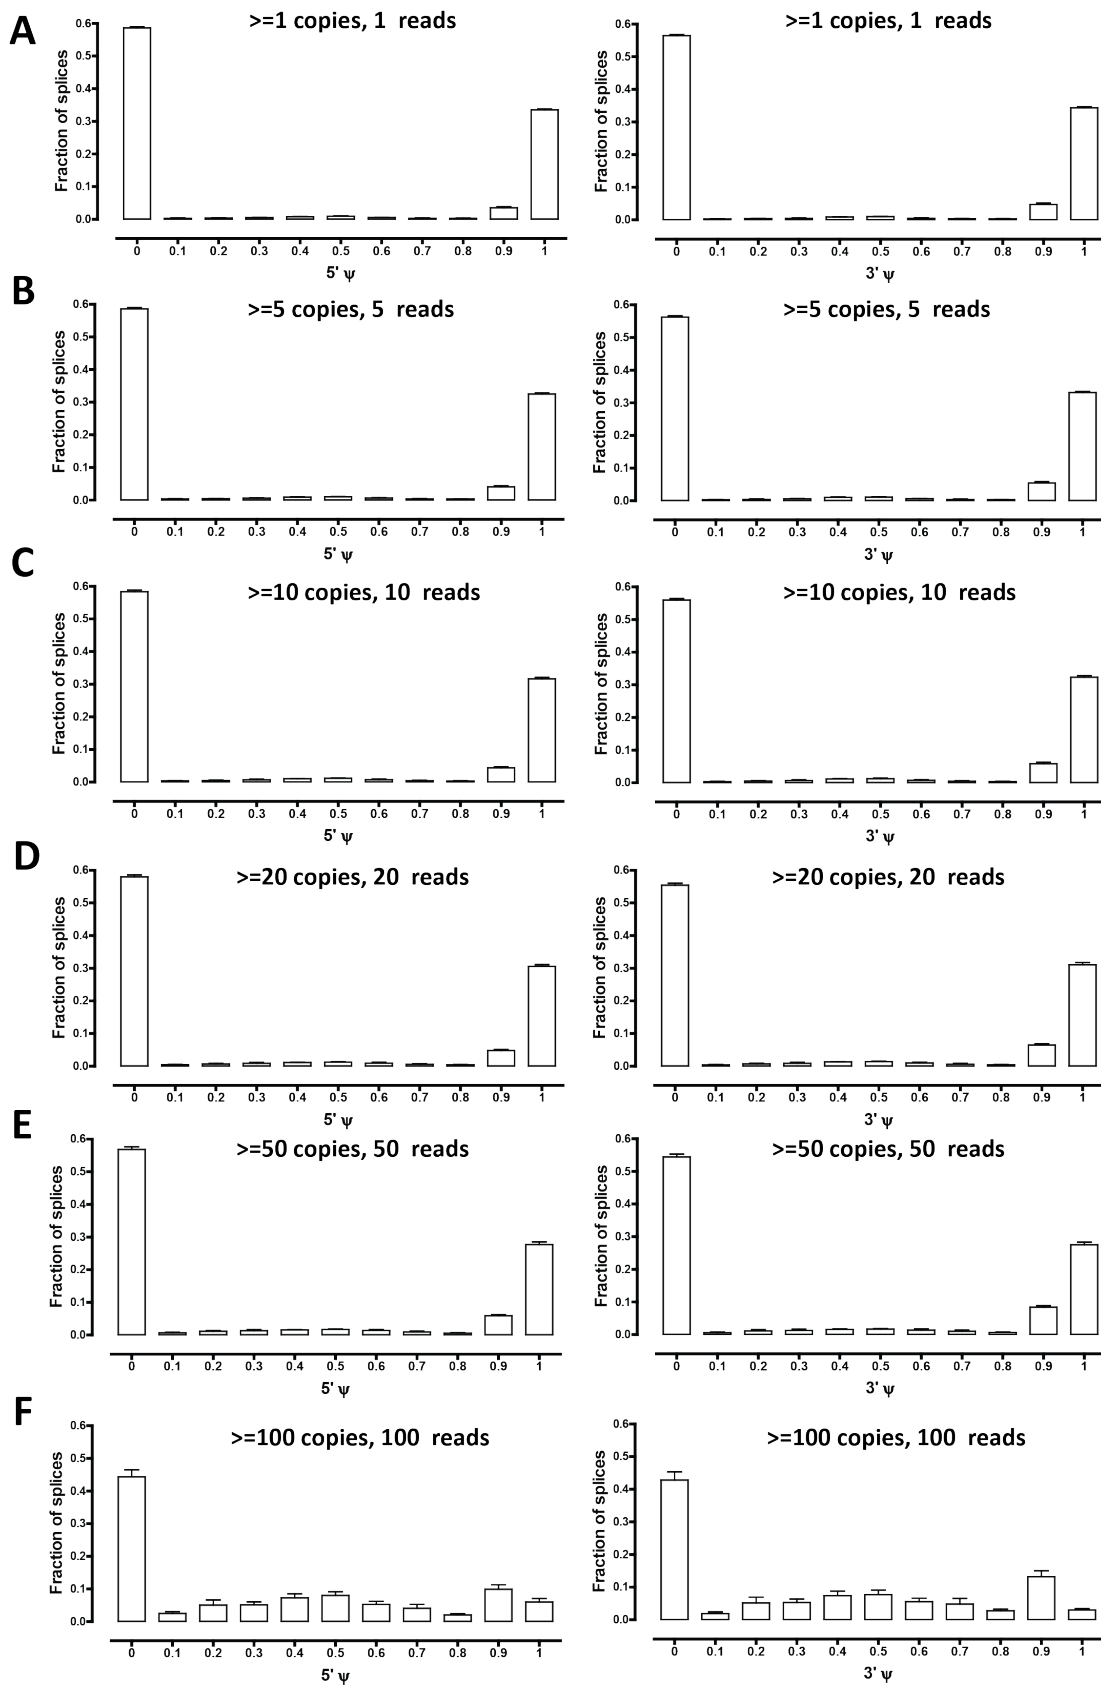

Supplementary Figure 42: Distribution of 5' and 3'  $\psi$  scores as a function of the expression and splice junction spanning reads threshold.

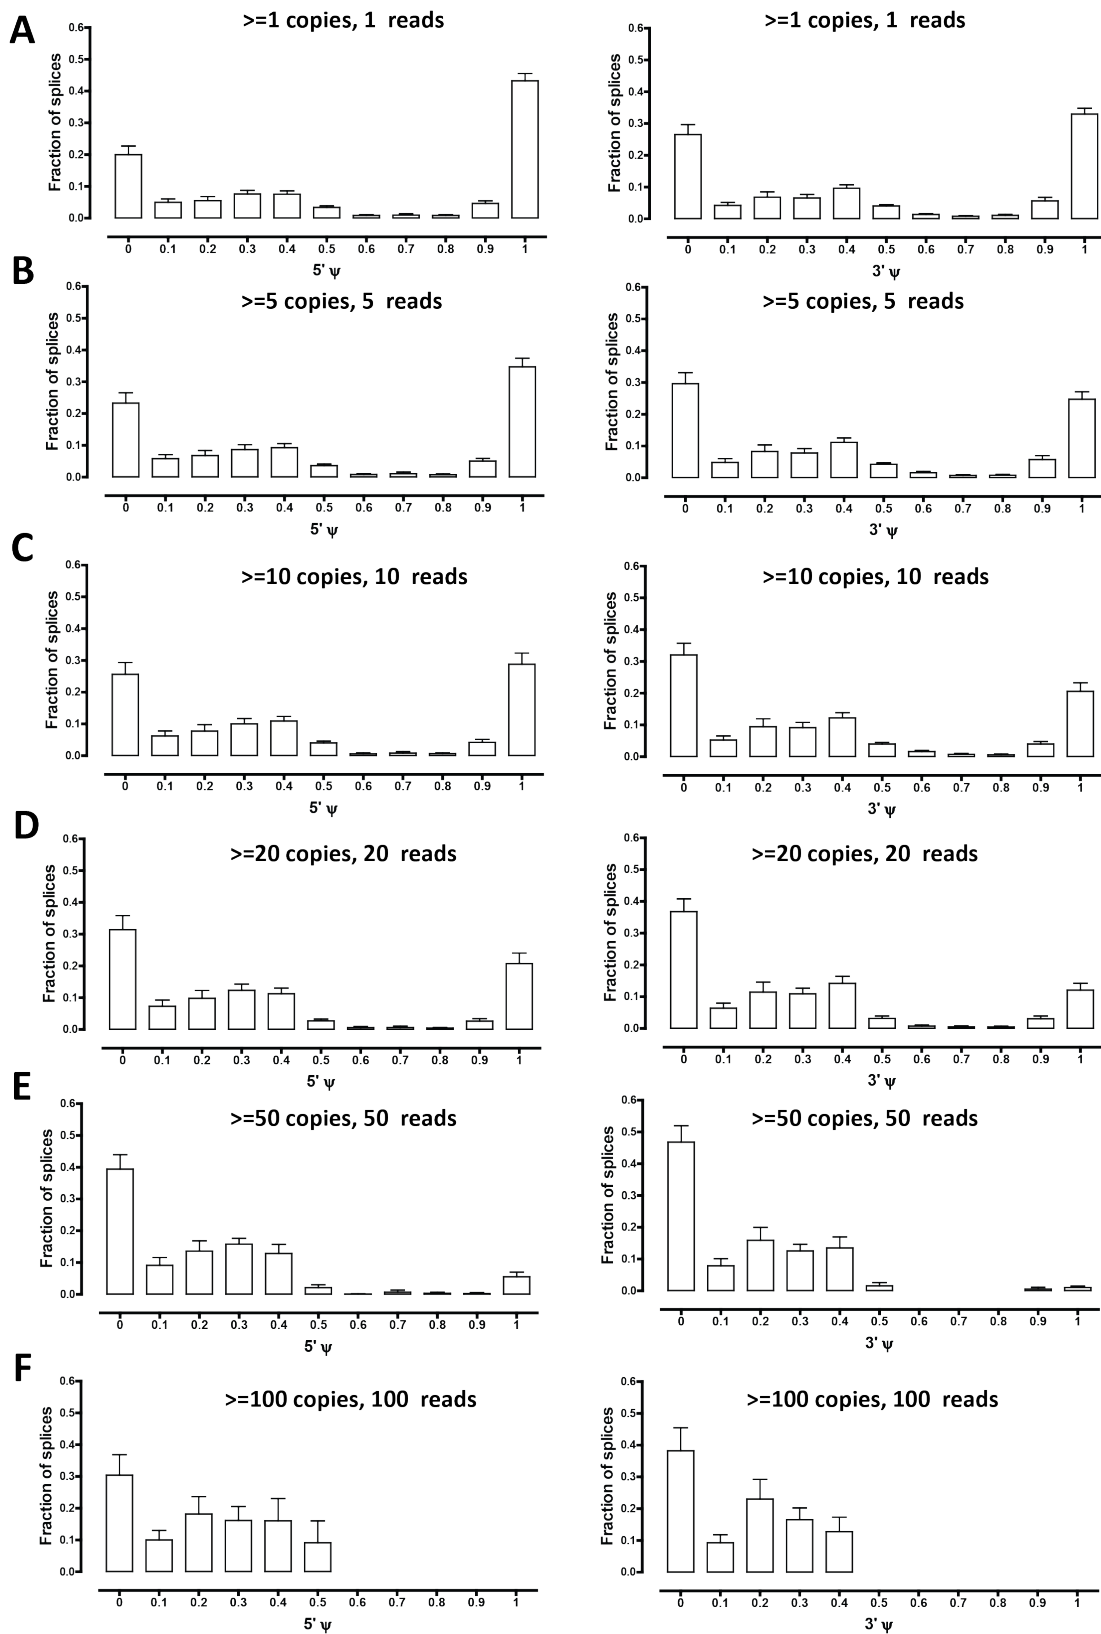

Supplementary Figure 43: Distribution of 5' and 3'  $\psi$  scores as a function of the expression and splice junction spanning reads threshold for novel splice junctions. Only novel splice junctions connecting at least one of the donor or acceptor site for which is annotated are included.

**A****single cells**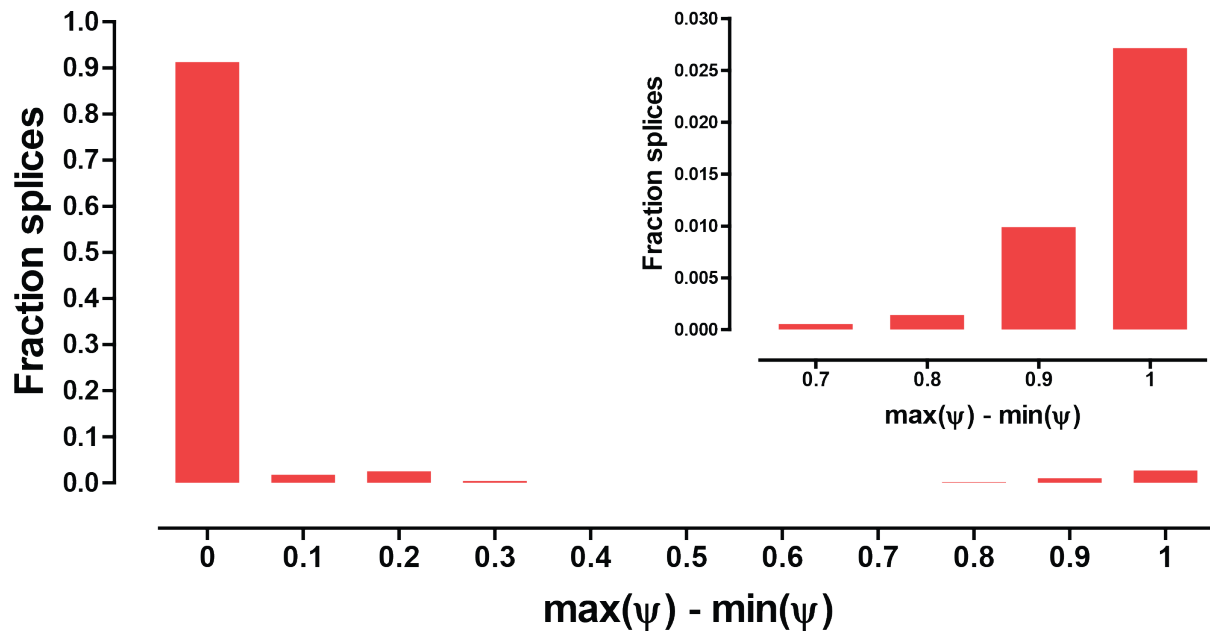**B****pool/split #1**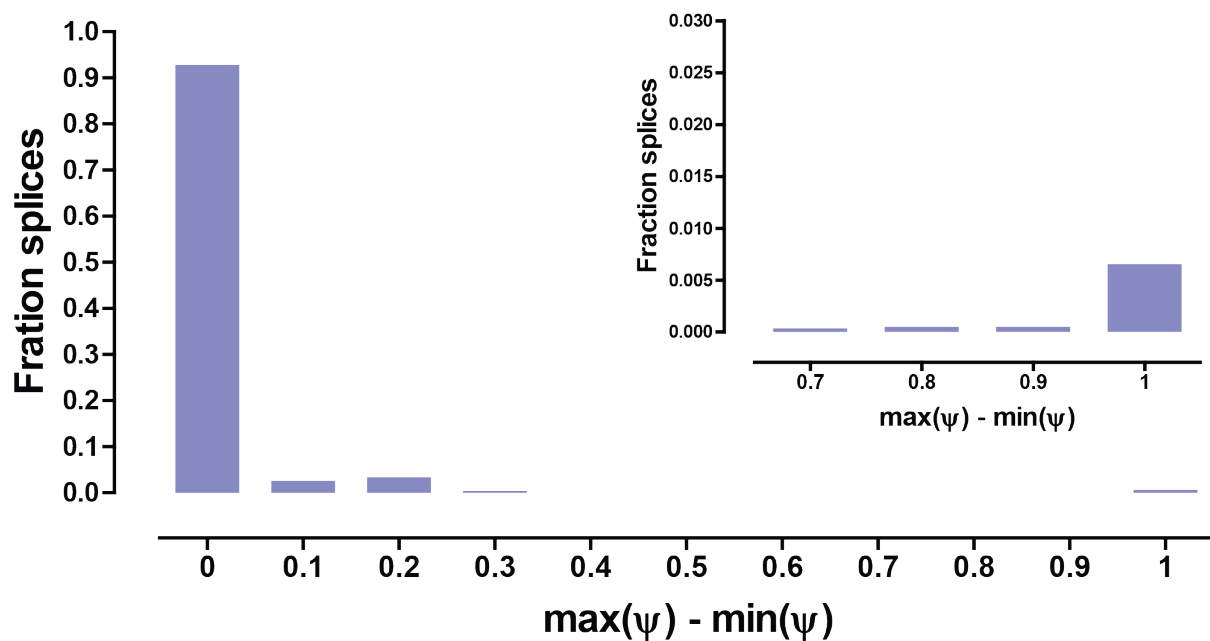

**Supplementary Figure 44: Major splice site switches between individual cells.** Shown is the maximum difference between  $\psi$  scores in single-cells (A) and individual libraries in pool/split experiment 1 (B). Only gene/library pairs for which the  $\psi$  score passed all three tests for statistical significance of bias towards one splice (described in Methods) were included



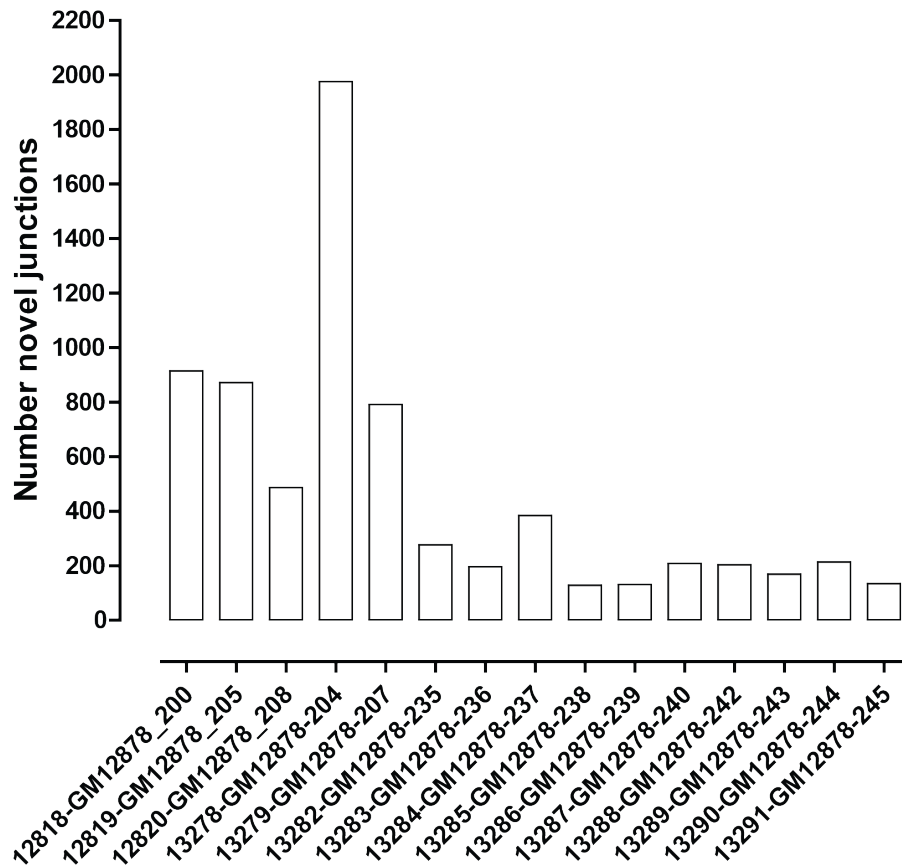

Supplementary Figure 45: Number of novel splice junctions (connecting to annotated donor and/or acceptor sites) detected in individual cells.

**Supplementary Figure 46 (following page): Relation between the long-range chromosomal element connectivity of TSSs and gene expression stochasticity.** Shown is the number of genes not detected in 0-5, 6-10 and 11-15 cells as a function of the number of ENCODE ChIA-PET connections to TSSs in K562 cells (replicates 1 and 2). K562 was used as the closest cell line to GM12878 for which such data is currently available; ChIA-PET connections were downloaded from the UCSC Genome Browser. Within each group of genes defined by the number of ChIA-PET connections, genes were further split by their average number of estimated copies per cell (where the average was calculated excluding libraries in which the genes were not detected) in order to define directly comparable groups of genes. Subgroups with less than 20 genes were not plotted.

Pol2 Rep1 intrachromosomal connections

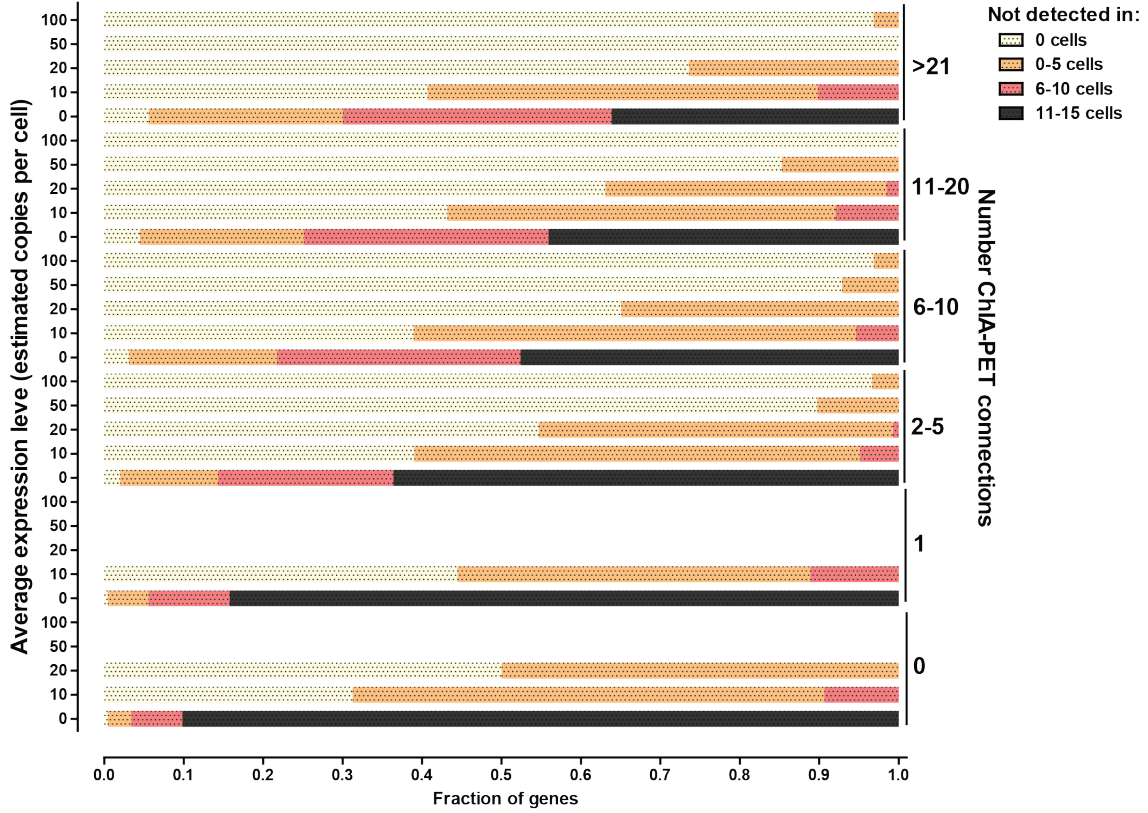

Pol2 Rep2 intrachromosomal connections

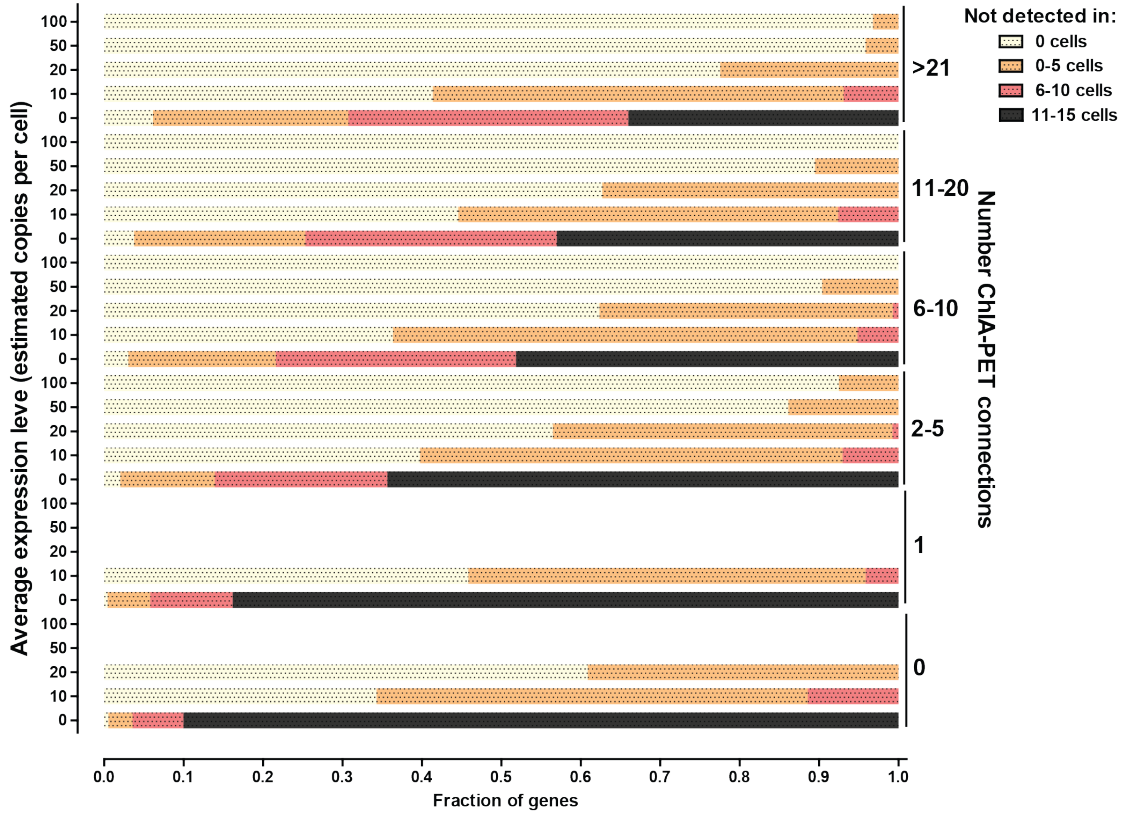

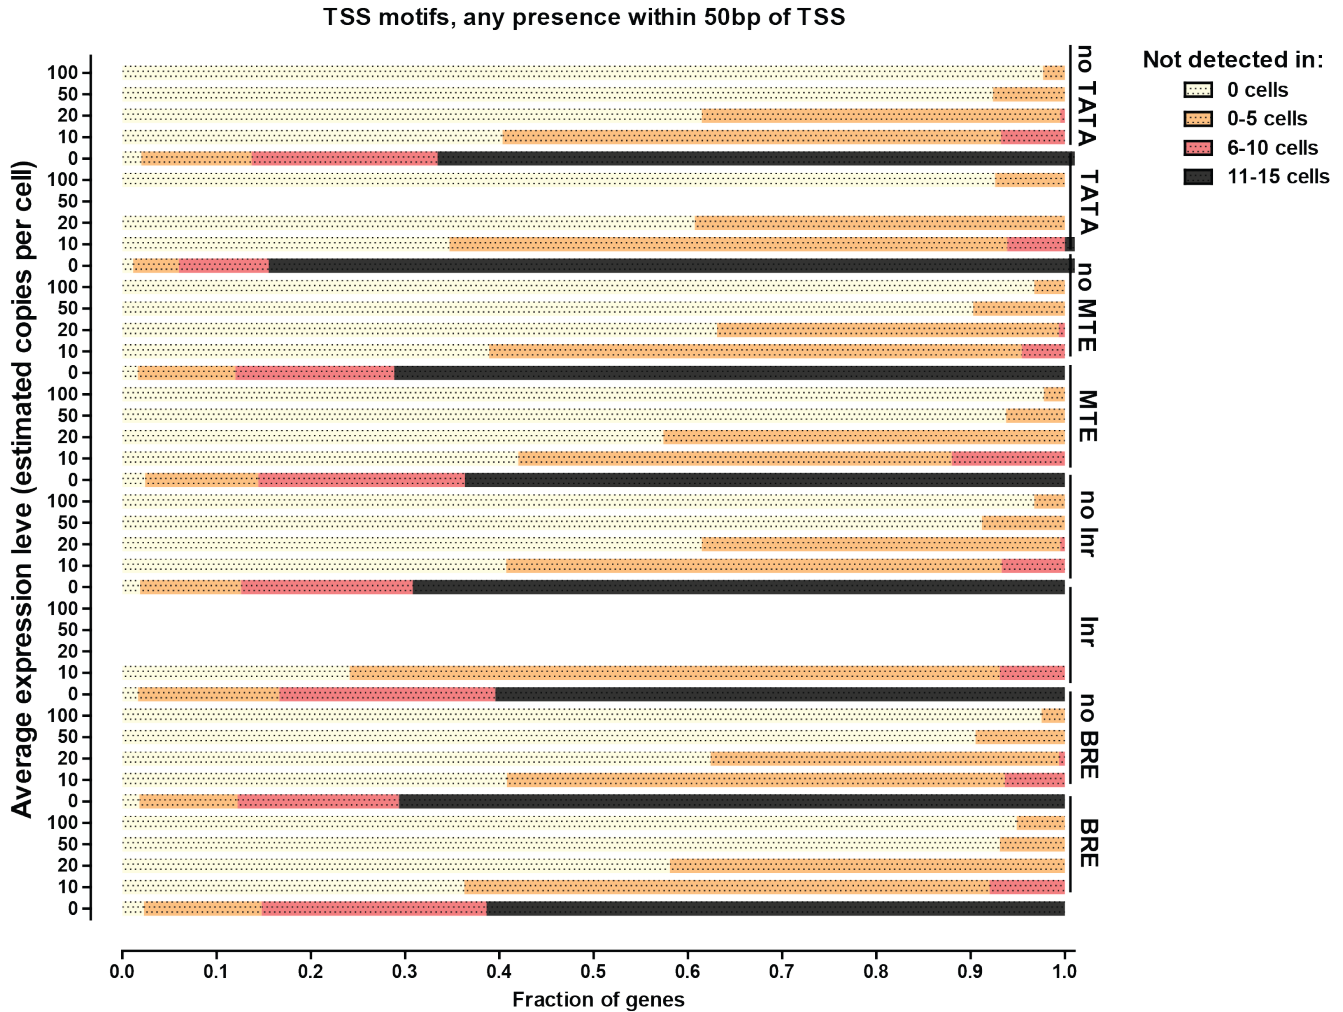

**Supplementary Figure 47: Relation between the presence of TSS-associated sequence elements and expression stochasticity.** Shown is the number of genes not detected in 0-5, 6-10 and 11-15 cells as a function of the presence or absence of sequence motifs at TSSs (defined by FIMO using position weight matrices obtained from Jin et al., 2006). Within each such group, genes were further split by their average number of estimated copies per cell (where the average was calculated excluding libraries in which the genes were not detected) in order to define directly comparable groups of genes. Subgroups with less than 20 genes were not plotted.

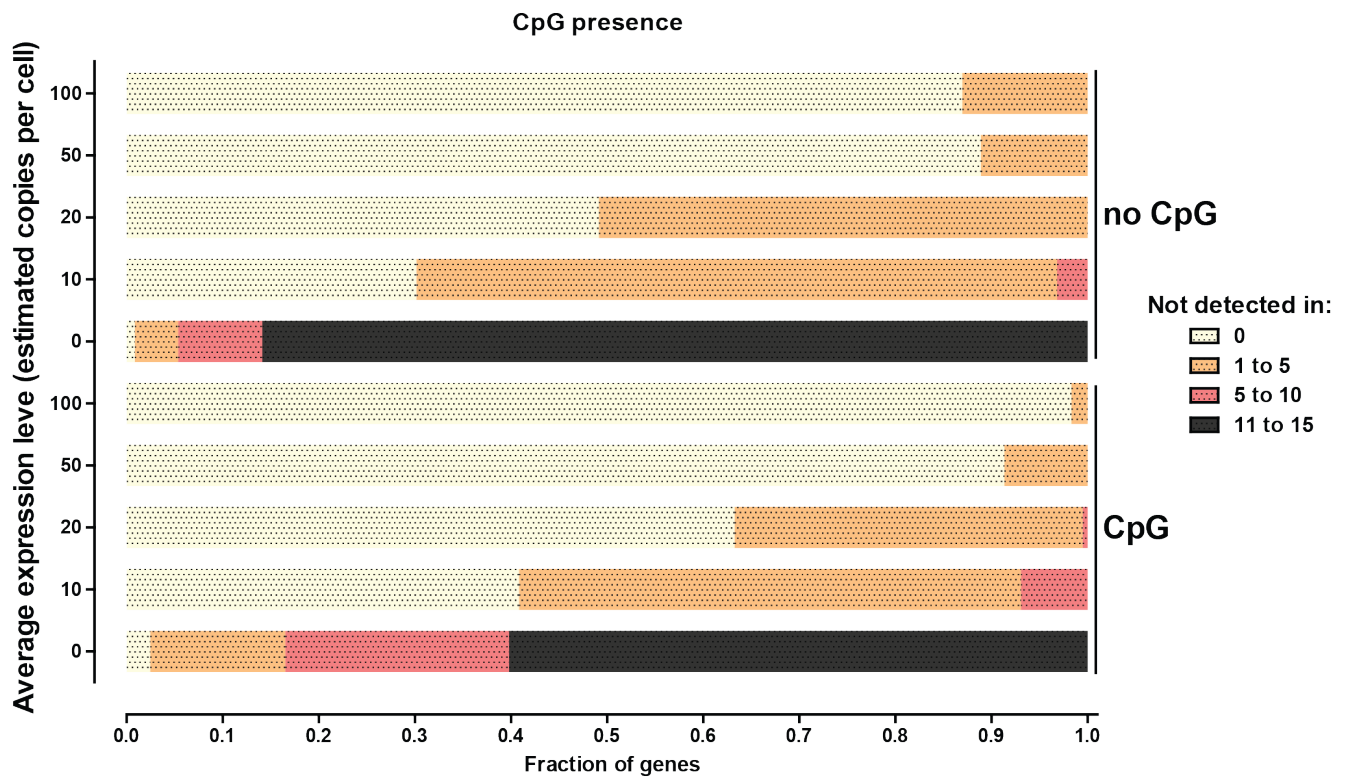

**Supplementary Figure 48: Relation between the presence of CpG islands near TSSs and expression stochasticity.** Shown is the number of genes not detected in 0-5, 6-10 and 11-15 cells as a function of the presence or absence of CpG islands within 1kb of the TSS. Within each such group, genes were further split by their average number of estimated copies per cell (where the average was calculated excluding libraries in which the genes were not detected) in order to define directly comparable groups of genes. Subgroups with less than 20 genes were not plotted.

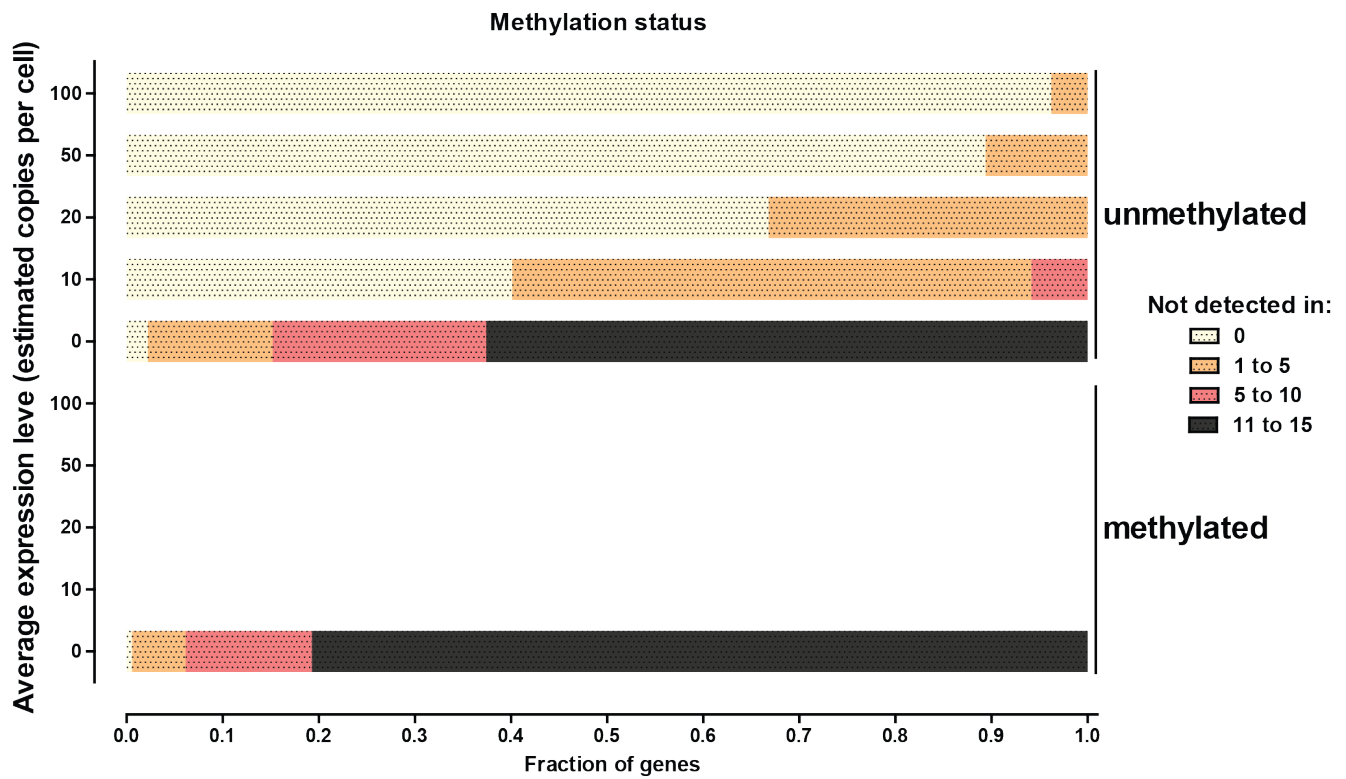

**Supplementary Figure 49: Relation between the methylation status of promoters and expression stochasticity.** Shown is the number of genes not detected in 0-5, 6-10 and 11-15 cells as a function of the methylation status of their promoters as defined using ENCODE reduced-representation bisulfite sequencing data (RRBS) for the GM12878 cell line from Varley et al., 2013, downloaded from the UCSC Genome Browser. Within each such group, genes were further split by their average number of estimated copies per cell (where the average was calculated excluding libraries in which the genes were not detected) in order to define directly comparable groups of genes. Subgroups with less than 20 genes were not plotted.

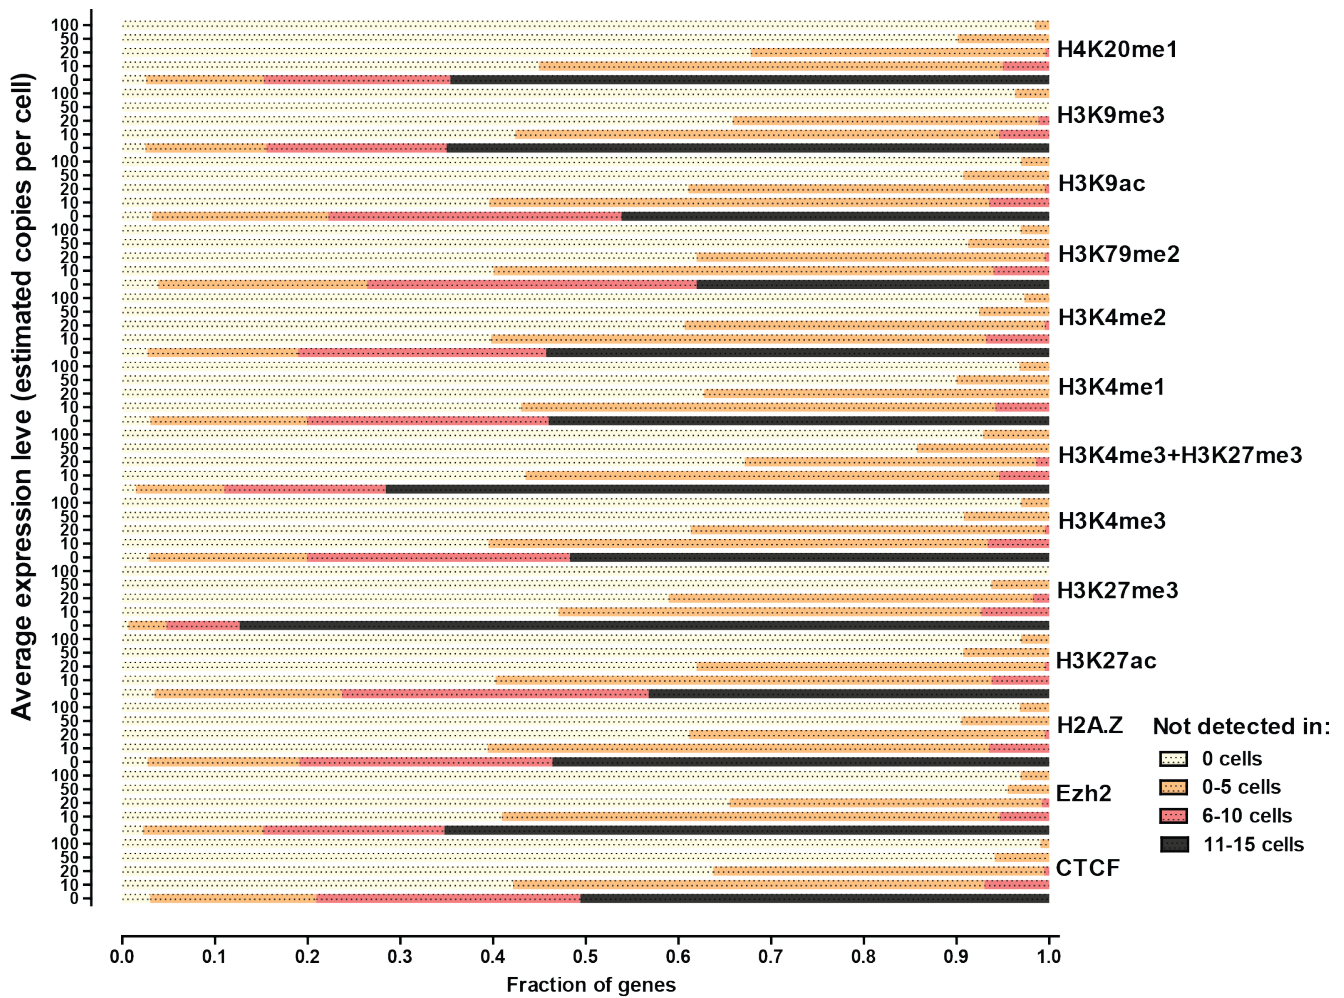

**Supplementary Figure 50: Relation between the histone modification status of promoters and expression stochasticity.** Shown is the number of genes not detected in 0-5, 6-10 and 11-15 cells as a function of the presence or absence of the various histone marks, the bivalent H3K4me3 + H3K27me3 combination of marks, CTCF and Ezh2 as defined from ENCODE data for the GM12878 cell line using the peak calls available from the UCSC Genome Browser. Within each such group, genes were further split by their average number of estimated copies per cell (where the average was calculated excluding libraries in which the genes were not detected) in order to define directly comparable groups of genes. Subgroups with less than 20 genes were not plotted.

|                 | 12519 10 cells | 12520 10 cells | 13300 10 cells | 13301 10 cells | 12517 30 cells | 12518 30 cells | 12515 100 cells | 12516 100 cells | 13302 100cells | 13303 100cells | 13276 100pg | 13277 100pg | 13274 10ng | 13275 10ng |
|-----------------|----------------|----------------|----------------|----------------|----------------|----------------|-----------------|-----------------|----------------|----------------|-------------|-------------|------------|------------|
| 12519 10 cells  | 1.00           | 0.30           | 0.27           | 0.28           | 0.50           | 0.52           | 0.50            | 0.52            | 0.45           | 0.33           | 0.28        | 0.23        | 0.59       | 0.53       |
| 12520 10 cells  | 0.30           | 1.00           | 0.24           | 0.31           | 0.43           | 0.43           | 0.45            | 0.46            | 0.43           | 0.34           | 0.24        | 0.30        | 0.49       | 0.47       |
| 13300 10 cells  | 0.27           | 0.24           | 1.00           | 0.25           | 0.38           | 0.35           | 0.39            | 0.39            | 0.39           | 0.30           | 0.21        | 0.16        | 0.43       | 0.43       |
| 13301 10 cells  | 0.28           | 0.31           | 0.25           | 1.00           | 0.40           | 0.39           | 0.38            | 0.39            | 0.34           | 0.36           | 0.16        | 0.20        | 0.41       | 0.39       |
| 12517 30 cells  | 0.50           | 0.43           | 0.38           | 0.40           | 1.00           | 0.68           | 0.72            | 0.73            | 0.63           | 0.49           | 0.36        | 0.33        | 0.77       | 0.70       |
| 12518 30 cells  | 0.52           | 0.43           | 0.35           | 0.39           | 0.68           | 1.00           | 0.73            | 0.72            | 0.60           | 0.46           | 0.39        | 0.33        | 0.77       | 0.69       |
| 12515 100 cells | 0.50           | 0.45           | 0.39           | 0.38           | 0.72           | 0.73           | 1.00            | 0.77            | 0.64           | 0.50           | 0.41        | 0.36        | 0.82       | 0.73       |
| 12516 100 cells | 0.52           | 0.46           | 0.39           | 0.39           | 0.73           | 0.72           | 0.77            | 1.00            | 0.67           | 0.51           | 0.37        | 0.34        | 0.81       | 0.73       |
| 13302 100cells  | 0.45           | 0.43           | 0.39           | 0.34           | 0.63           | 0.60           | 0.64            | 0.67            | 1.00           | 0.44           | 0.29        | 0.37        | 0.71       | 0.65       |
| 13303 100cells  | 0.33           | 0.34           | 0.30           | 0.36           | 0.49           | 0.46           | 0.50            | 0.51            | 0.44           | 1.00           | 0.24        | 0.28        | 0.54       | 0.51       |
| 13276 100pg     | 0.28           | 0.24           | 0.21           | 0.16           | 0.36           | 0.39           | 0.41            | 0.37            | 0.29           | 0.24           | 1.00        | 0.20        | 0.38       | 0.39       |
| 13277 100pg     | 0.23           | 0.30           | 0.16           | 0.20           | 0.33           | 0.33           | 0.36            | 0.34            | 0.37           | 0.28           | 0.20        | 1.00        | 0.37       | 0.38       |
| 13274 10ng      | 0.59           | 0.49           | 0.43           | 0.41           | 0.77           | 0.77           | 0.82            | 0.81            | 0.71           | 0.54           | 0.38        | 0.37        | 1.00       | 0.81       |
| 13275 10ng      | 0.53           | 0.47           | 0.43           | 0.39           | 0.70           | 0.69           | 0.73            | 0.73            | 0.65           | 0.51           | 0.39        | 0.38        | 0.81       | 1.00       |

Supplementary Figure 51: Correlation between allelic bias in cell pools of different sizes.

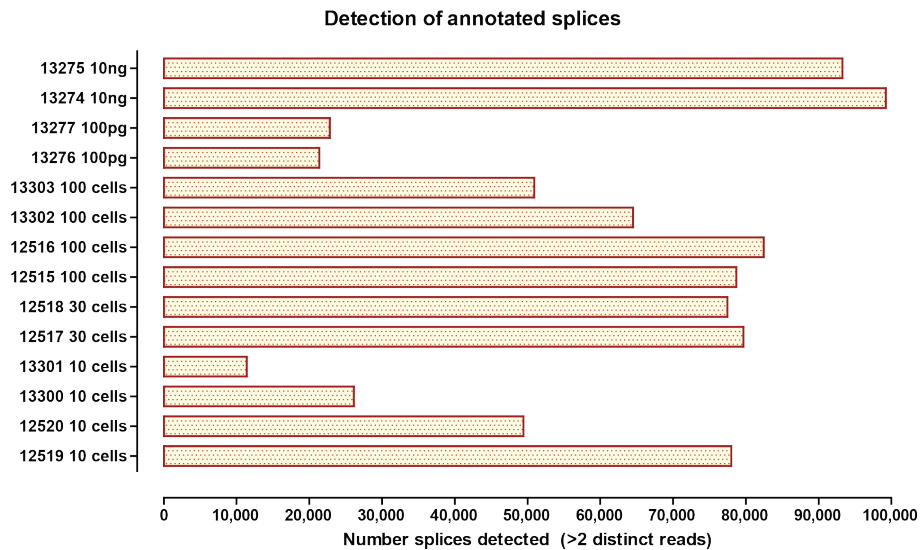

Supplementary Figure 52: Detection of annotated splice junctions in cell pools of different sizes.

|                 | 12515 100 cells | 12516 100 cells | 12517 30 cells | 12518 30 cells | 12519 10 cells | 12520 10 cells | 13274 10ng | 13275 10ng | 13276 100pg | 13277 100pg | 13300 10 cells | 13301 10 cells | 13302 100 cells | 13303 100 cells |
|-----------------|-----------------|-----------------|----------------|----------------|----------------|----------------|------------|------------|-------------|-------------|----------------|----------------|-----------------|-----------------|
| 12515 100 cells | 1.00            | 0.99            | 0.99           | 0.99           | 0.93           | 0.90           | 0.89       | 0.92       | 0.69        | 0.71        | 0.80           | 0.75           | 0.94            | 0.94            |
| 12516 100 cells | 0.99            | 1.00            | 0.99           | 0.99           | 0.93           | 0.90           | 0.89       | 0.92       | 0.69        | 0.71        | 0.80           | 0.74           | 0.94            | 0.94            |
| 12517 30 cells  | 0.99            | 0.99            | 1.00           | 0.99           | 0.93           | 0.91           | 0.88       | 0.91       | 0.68        | 0.70        | 0.81           | 0.76           | 0.93            | 0.93            |
| 12518 30 cells  | 0.99            | 0.99            | 0.99           | 1.00           | 0.93           | 0.91           | 0.89       | 0.92       | 0.69        | 0.71        | 0.81           | 0.75           | 0.93            | 0.94            |
| 12519 10 cells  | 0.93            | 0.93            | 0.93           | 0.93           | 1.00           | 0.89           | 0.86       | 0.93       | 0.64        | 0.67        | 0.78           | 0.71           | 0.87            | 0.87            |
| 12520 10 cells  | 0.90            | 0.90            | 0.91           | 0.91           | 0.89           | 1.00           | 0.82       | 0.88       | 0.63        | 0.65        | 0.75           | 0.71           | 0.85            | 0.85            |
| 13274 10ng      | 0.89            | 0.89            | 0.88           | 0.89           | 0.86           | 0.82           | 1.00       | 0.94       | 0.75        | 0.76        | 0.79           | 0.71           | 0.91            | 0.89            |
| 13275 10ng      | 0.92            | 0.92            | 0.91           | 0.92           | 0.93           | 0.88           | 0.94       | 1.00       | 0.68        | 0.71        | 0.78           | 0.70           | 0.89            | 0.88            |
| 13276 100pg     | 0.69            | 0.69            | 0.68           | 0.69           | 0.64           | 0.63           | 0.75       | 0.68       | 1.00        | 0.65        | 0.63           | 0.60           | 0.73            | 0.71            |
| 13277 100pg     | 0.71            | 0.71            | 0.70           | 0.71           | 0.67           | 0.65           | 0.76       | 0.71       | 0.65        | 1.00        | 0.65           | 0.61           | 0.75            | 0.73            |
| 13300 10 cells  | 0.80            | 0.80            | 0.81           | 0.81           | 0.78           | 0.75           | 0.79       | 0.78       | 0.63        | 0.65        | 1.00           | 0.68           | 0.80            | 0.79            |
| 13301 10 cells  | 0.75            | 0.74            | 0.76           | 0.75           | 0.71           | 0.71           | 0.71       | 0.70       | 0.60        | 0.61        | 0.68           | 1.00           | 0.75            | 0.74            |
| 13302 100 cells | 0.94            | 0.94            | 0.93           | 0.93           | 0.87           | 0.85           | 0.91       | 0.89       | 0.73        | 0.75        | 0.80           | 0.75           | 1.00            | 0.95            |
| 13303 100 cells | 0.94            | 0.94            | 0.93           | 0.94           | 0.87           | 0.85           | 0.89       | 0.88       | 0.71        | 0.73        | 0.79           | 0.74           | 0.95            | 1.00            |

**Supplementary Figure 53: Correlation between expression estimates based on different cell pools sizes and different amounts of input bulk RNA.** Correlation coefficients were calculated on the  $\log_2(FPKM + 1)$  transform of the FPKM estimates for the refSeq annotation, with only protein coding genes present at  $\geq 1$  FPKM in at least one library included.



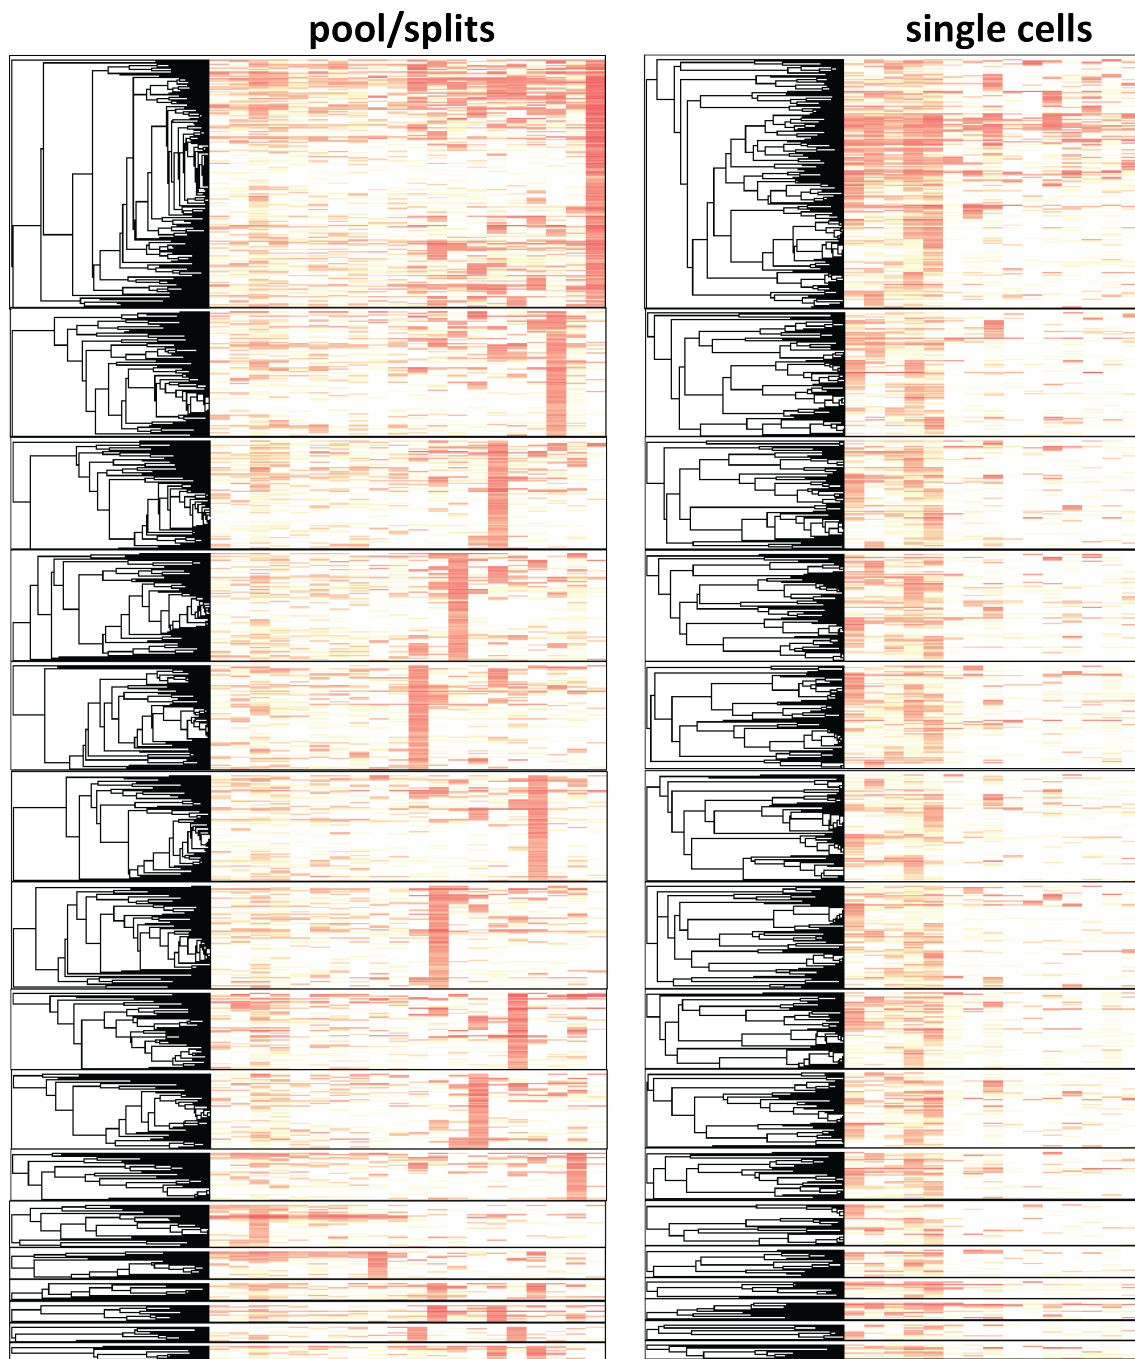

**Supplementary Figure 54: Mirrored coexpression analysis of pool/split and single cell datasets.** The same analysis presented in Figure 4 was carried out treating pool/splits as single cells and vice versa.

## Supplementary Tables

**Supplementary Table 1: Read mapping statistics.** Note that libraries with numbers lower than 12543 used a different spike-in cocktail than other libraries and the correspondence between initial spike-in amounts and final FPKM scores in the sequenced libraries was poor. For this reason, we excluded those libraries from analyses based on estimating absolute transcript abundances in copies per cell; we are however making the data publicly available as we think the measurements of relative transcript abundances are of good quality.

| Library                 | Read Length | Unique     | UniqueSplices | Multi     | MultiSplices |
|-------------------------|-------------|------------|---------------|-----------|--------------|
| 12515 100-cell pool A   | 1x100       | 17,687,845 | 3,209,817     | 2,324,217 | 87,366       |
| 12516 100-cell pool B   | 1x100       | 19,196,833 | 3,613,603     | 2,472,612 | 116,124      |
| 12517 30-cell pool A    | 1x100       | 19,656,269 | 3,836,281     | 2,747,606 | 112,715      |
| 12518 30-cell pool B    | 1x100       | 15,906,819 | 3,105,647     | 2,209,219 | 107,243      |
| 12519 10-cell pool A    | 1x100       | 25,589,985 | 7,716,359     | 3,942,315 | 264,713      |
| 12520 10-cell pool B    | 1x100       | 14,033,035 | 3,831,207     | 2,172,320 | 92,664       |
| 12522 cell 183          | 1x100       | 13,444,432 | 4,123,615     | 1,991,506 | 151,473      |
| 12523 cell 184          | 1x100       | 18,553,787 | 6,282,207     | 2,753,213 | 162,393      |
| 12524 cell 185          | 1x100       | 15,306,477 | 4,973,962     | 2,375,825 | 123,920      |
| 12534 cell 186          | 1x100       | 9,412,759  | 1,792,734     | 1,104,103 | 92,146       |
| 12535 cell 187          | 1x100       | 12,021,473 | 2,593,517     | 1,762,078 | 122,152      |
| 12536 cell 188          | 1x100       | 6,173,793  | 1,609,714     | 751,818   | 35,935       |
| 12537 cell 189          | 1x100       | 8,900,605  | 2,552,063     | 1,195,651 | 71,165       |
| 12538 cell 190          | 1x100       | 11,976,901 | 3,061,070     | 1,578,373 | 114,265      |
| 12539 cell 191          | 1x100       | 4,894,790  | 990,183       | 687,469   | 55,952       |
| 12540 cell 192          | 1x100       | 8,586,601  | 2,191,767     | 1,312,434 | 70,208       |
| 12541 cell 193          | 1x100       | 11,615,819 | 2,810,842     | 1,636,014 | 75,938       |
| 12542 cell 194          | 1x100       | 9,299,741  | 2,543,984     | 1,388,630 | 61,370       |
| 12543 cell 195          | 1x100       | 9,051,228  | 1,583,943     | 1,172,717 | 52,683       |
| 12818 cell 200          | 1x100       | 9,465,272  | 2,903,793     | 1,338,444 | 87,282       |
| 12819 cell 205          | 1x100       | 11,895,334 | 3,486,064     | 1,184,543 | 59,413       |
| 12820 cell 208          | 1x100       | 13,034,342 | 2,346,996     | 1,418,030 | 120,778      |
| 12821 pool/split 5      | 1x100       | 9,152,130  | 2,394,362     | 1,520,080 | 76,965       |
| 12822 pool/split 6      | 1x100       | 13,938,165 | 3,517,926     | 2,286,058 | 113,187      |
| 12823 pool/split 7      | 1x100       | 11,217,362 | 1,872,905     | 1,154,032 | 73,843       |
| 12824 pool/split 8      | 1x100       | 11,822,904 | 2,135,005     | 1,364,032 | 70,389       |
| 13270 pool/split 3 219  | 1x100       | 7,416,424  | 4,799,669     | 1,463,631 | 457,029      |
| 13271 pool/split 4 220  | 1x100       | 8,421,706  | 5,262,489     | 1,644,668 | 496,781      |
| 13272 pool/split 9 225  | 1x100       | 12,782,172 | 4,509,292     | 1,480,617 | 427,615      |
| 13273 pool/split 10 226 | 1x100       | 10,325,385 | 6,582,179     | 2,100,134 | 641,196      |
| 13274 10ng RNA rep1     | 1x100       | 33,234,882 | 4,315,401     | 1,629,950 | 267,868      |
| 13275 10ng RNA rep2     | 1x100       | 36,981,036 | 5,266,981     | 1,704,651 | 301,449      |
| 13276 100pg RNA rep1    | 1x100       | 11,363,854 | 4,904,470     | 1,008,244 | 258,637      |
| 13277 100pg RNA rep2    | 1x100       | 34,939,583 | 6,750,980     | 2,212,161 | 442,062      |
| 13278 cell 204          | 1x100       | 20,631,514 | 11,290,949    | 3,418,238 | 921,764      |
| 13279 cell 207          | 1x100       | 10,926,463 | 4,949,640     | 1,664,688 | 490,150      |
| 13280 pool/split 232    | 1x100       | 21,240,282 | 9,537,592     | 2,722,244 | 726,943      |
| 13281 pool/split 233    | 1x100       | 25,425,429 | 9,576,495     | 2,510,136 | 703,065      |
| 13282 cell 235          | 1x100       | 10,167,950 | 3,677,729     | 966,782   | 191,523      |
| 13283 cell 236          | 1x100       | 18,782,295 | 7,784,497     | 2,210,674 | 572,837      |
| 13284 cell 237          | 1x100       | 25,766,827 | 8,914,958     | 2,235,457 | 594,889      |
| 13285 cell 238          | 1x100       | 16,334,009 | 6,842,776     | 2,351,813 | 602,952      |
| 13286 cell 239          | 1x100       | 19,717,157 | 5,801,008     | 2,473,230 | 595,738      |
| 13287 cell 240          | 1x100       | 21,881,195 | 8,373,245     | 2,386,125 | 645,571      |

*Continued on next page*

Supplementary Table 1 – *Continued from previous page*

| Library                 | Read Length | Unique     | UniqueSplices | Multi     | MultiSplices |
|-------------------------|-------------|------------|---------------|-----------|--------------|
| 13288 cell 242          | 1x100       | 19,165,078 | 6,146,306     | 1,338,990 | 330,167      |
| 13289 cell 243          | 1x100       | 24,802,270 | 9,575,191     | 2,885,175 | 744,245      |
| 13290 cell 244          | 1x100       | 7,400,266  | 3,086,583     | 741,408   | 223,657      |
| 13291 cell 245          | 1x100       | 21,024,295 | 7,093,623     | 2,111,549 | 519,415      |
| 13292 pool/split 246    | 1x100       | 17,296,143 | 8,394,643     | 2,223,819 | 572,943      |
| 13294 pool/split 248    | 1x100       | 14,399,162 | 6,272,094     | 1,784,982 | 459,195      |
| 13295 pool/split 249    | 1x100       | 22,428,103 | 10,454,916    | 2,898,266 | 815,093      |
| 13296 pool/split 250    | 1x100       | 19,745,007 | 8,825,294     | 2,468,779 | 697,549      |
| 13297 pool/split 251    | 1x100       | 21,239,455 | 9,833,749     | 2,936,743 | 724,006      |
| 13298 pool/split 252    | 1x100       | 4,674,393  | 2,237,759     | 591,303   | 145,488      |
| 13299 pool/split 253    | 1x100       | 20,948,852 | 9,729,505     | 2,726,042 | 709,672      |
| 13300 10-cell pool 254  | 1x100       | 29,113,485 | 8,790,470     | 2,600,560 | 702,142      |
| 13301 11-cell pool 255  | 1x100       | 34,836,093 | 11,643,761    | 3,802,039 | 1,080,518    |
| 13302 100-cell pool 256 | 1x100       | 18,477,603 | 4,084,659     | 1,618,554 | 329,602      |
| 13303 100-cell pool 257 | 1x100       | 43,640,710 | 11,315,061    | 4,819,940 | 1,036,363    |

**Supplementary Table 2: Initial amounts of spiked-in sequences in absolute number of RNA copies.** Note that two more spikes, “Lambda 9786 clone F” (9786bp) and “Lambda 11300 clone G” (11290bp) were included in libraries, however, they exhibit highly non-uniform read coverage leading to unreliable quantification estimates and were thus excluded.

| Spike-in | Libraries 12515-12543 | Libraries 12818-13303 |
|----------|-----------------------|-----------------------|
| AGP23    | 100                   | 5                     |
| AP2      | 5                     | 50                    |
| EPR1     | 20                    | 10                    |
| OBF5     | 10                    | 500                   |
| PDF1     | 40                    | 20                    |
| VATG3    | 5000                  | 5000                  |

**Supplementary Table 3: Full list of Gene Ontology categories enriched in coexpressed gene modules.** Gene Ontology enrichment in modules was assessed using FuncAssociate2.0 (Berriz et al., 2009).

| N               | X   | LOD                | P                     | P adj  | attrib ID  | attrib name                                                                                   |
|-----------------|-----|--------------------|-----------------------|--------|------------|-----------------------------------------------------------------------------------------------|
| <b>Module 1</b> |     |                    |                       |        |            |                                                                                               |
| 80              | 85  | 2.22750847233495   | 2.4288542157057e-80   | <0.001 | GO:0019083 | viral transcription                                                                           |
| 35              | 38  | 2.0543096800611    | 9.94569501487657e-35  | <0.001 | GO:0022625 | cytosolic large ribosomal subunit                                                             |
| 79              | 88  | 1.98429369667081   | 3.81815501340532e-75  | <0.001 | GO:0006415 | translational termination                                                                     |
| 82              | 92  | 1.95783499865395   | 2.25183855262354e-77  | <0.001 | GO:0019058 | viral infectious cycle                                                                        |
| 33              | 37  | 1.91934326185776   | 1.0606448232178e-31   | <0.001 | GO:0022627 | cytosolic small ribosomal subunit                                                             |
| 84              | 99  | 1.79959130536831   | 2.83136121010728e-75  | <0.001 | GO:0006414 | translational elongation                                                                      |
| 79              | 98  | 1.67170885189082   | 2.54715717317477e-67  | <0.001 | GO:0043624 | cellular protein complex disassembly                                                          |
| 79              | 99  | 1.64996220882795   | 1.16143543924047e-66  | <0.001 | GO:0043241 | protein complex disassembly                                                                   |
| 5               | 6   | 1.60339903304627   | 2.31518111579124e-05  | 0.042  | GO:0042719 | mitochondrial intermembrane space protein transporter complex                                 |
| 12              | 16  | 1.48484395467934   | 1.55655372018477e-10  | <0.001 | GO:0005753 | mitochondrial proton-transporting ATP synthase complex                                        |
| 12              | 16  | 1.48484395467934   | 1.55655372018477e-10  | <0.001 | GO:0045259 | proton-transporting ATP synthase complex                                                      |
| 8               | 11  | 1.42532291837978   | 3.17730434970578e-07  | <0.001 | GO:0042274 | ribosomal small subunit biogenesis                                                            |
| 42              | 60  | 1.41110133078985   | 7.7723344218279e-32   | <0.001 | GO:0015935 | small ribosomal subunit                                                                       |
| 10              | 14  | 1.40852193295129   | 1.23601718399618e-08  | <0.001 | GO:0042776 | mitochondrial ATP synthesis coupled proton transport                                          |
| 82              | 119 | 1.40425322218248   | 2.90687191098935e-60  | <0.001 | GO:0034623 | cellular macromolecular complex disassembly                                                   |
| 43              | 62  | 1.39861873942686   | 2.70656133560673e-32  | <0.001 | GO:0015934 | large ribosomal subunit                                                                       |
| 82              | 120 | 1.39279633589538   | 8.45636479922126e-60  | <0.001 | GO:0032984 | macromolecular complex disassembly                                                            |
| 14              | 20  | 1.39014850585389   | 1.95202402281072e-11  | <0.001 | GO:0015985 | energy coupled proton transport, down electrochemical gradient                                |
| 14              | 20  | 1.39014850585389   | 1.95202402281072e-11  | <0.001 | GO:0015986 | ATP synthesis coupled proton transport                                                        |
| 9               | 13  | 1.36475589719287   | 1.06059816949165e-07  | <0.001 | GO:0045263 | proton-transporting ATP synthase complex, coupling factor F(o)                                |
| 102             | 154 | 1.35835395745315   | 3.83509033779718e-72  | <0.001 | GO:0003735 | structural constituent of ribosome                                                            |
| 80              | 121 | 1.34883668562943   | 1.30325679955416e-56  | <0.001 | GO:0031018 | endocrine pancreas development                                                                |
| 6               | 9   | 1.3082177020168    | 2.3318724760727e-05   | 0.049  | GO:0042273 | ribosomal large subunit biogenesis                                                            |
| 92              | 156 | 1.22084501073779   | 1.79769896957827e-58  | <0.001 | GO:0022415 | viral reproductive process                                                                    |
| 9               | 15  | 1.20500031764798   | 6.35922215735707e-07  | <0.001 | GO:0042613 | MHC class II protein complex                                                                  |
| 90              | 159 | 1.17815283094918   | 4.63835969773452e-55  | <0.001 | GO:0005840 | ribosome                                                                                      |
| 11              | 20  | 1.12368307791708   | 1.16201671228436e-07  | <0.001 | GO:0002504 | antigen processing and presentation of peptide or polysaccharide antigen via MHC class II     |
| 126             | 243 | 1.1058240710311    | 8.64889403866865e-71  | <0.001 | GO:0006412 | translation                                                                                   |
| 33              | 66  | 1.04671661076047   | 1.04054778845837e-18  | <0.001 | GO:0070469 | respiratory chain                                                                             |
| 88              | 180 | 1.04302248261017   | 8.36713797967258e-47  | <0.001 | GO:0071845 | cellular component disassembly at cellular level                                              |
| 13              | 26  | 1.04120105244121   | 3.59500355461033e-08  | <0.001 | GO:0004129 | cytochrome c oxidase activity                                                                 |
| 13              | 26  | 1.04120105244121   | 3.59500355461033e-08  | <0.001 | GO:0015002 | heme-copper terminal oxidase activity                                                         |
| 13              | 26  | 1.04120105244121   | 3.59500355461033e-08  | <0.001 | GO:0016676 | oxidoreductase activity, acting on a heme group of donors, oxygen as acceptor                 |
| 88              | 181 | 1.03832508439038   | 1.50023036663094e-46  | <0.001 | GO:0022411 | cellular component disassembly                                                                |
| 50              | 105 | 1.01033284389759   | 2.12881566827084e-26  | <0.001 | GO:0022904 | respiratory electron transport chain                                                          |
| 13              | 27  | 1.01013943569481   | 6.3992281019869e-08   | <0.001 | GO:0016675 | oxidoreductase activity, acting on a heme group of donors                                     |
| 13              | 27  | 1.01013943569481   | 6.3992281019869e-08   | <0.001 | GO:0019843 | rRNA binding                                                                                  |
| 22              | 46  | 1.00663430266062   | 2.01941178786577e-12  | <0.001 | GO:0005747 | mitochondrial respiratory chain complex I                                                     |
| 22              | 46  | 1.00663430266062   | 2.01941178786577e-12  | <0.001 | GO:0030964 | NADH dehydrogenase complex                                                                    |
| 22              | 46  | 1.00663430266062   | 2.01941178786577e-12  | <0.001 | GO:0045271 | respiratory chain complex I                                                                   |
| 13              | 28  | 0.9811483355026407 | 1.102543066563049e-07 | <0.001 | GO:0016469 | proton-transporting two-sector ATPase complex                                                 |
| 20              | 44  | 0.965600146054987  | 6.60764042765157e-11  | <0.001 | GO:0003954 | NADH dehydrogenase activity                                                                   |
| 20              | 44  | 0.965600146054987  | 6.60764042765157e-11  | <0.001 | GO:0008137 | NADH dehydrogenase (ubiquinone) activity                                                      |
| 20              | 44  | 0.965600146054987  | 6.60764042765157e-11  | <0.001 | GO:0050136 | NADH dehydrogenase (quinone) activity                                                         |
| 10              | 22  | 0.964605445604187  | 4.26260478570593e-06  | 0.009  | GO:0033177 | proton-transporting two-sector ATPase complex, proton-transporting domain                     |
| 19              | 43  | 0.94357846286631   | 3.63592920641863e-10  | <0.001 | GO:0006120 | mitochondrial electron transport, NADH to ubiquinone                                          |
| 56              | 140 | 0.877587213657932  | 1.12610252541087e-24  | <0.001 | GO:0022900 | electron transport chain                                                                      |
| 20              | 50  | 0.870301953062918  | 1.08177287181172e-09  | <0.001 | GO:0016655 | oxidoreductase activity, acting on NADH or NADPH, quinone or similar compound as acceptor     |
| 126             | 329 | 0.864920624044305  | 7.76265565058296e-52  | <0.001 | GO:0016032 | viral reproduction                                                                            |
| 19              | 48  | 0.862785503901917  | 3.4843140169824e-09   | <0.001 | GO:0022613 | ribonucleoprotein complex biogenesis                                                          |
| 51              | 133 | 0.846254921603025  | 1.32115278867509e-21  | <0.001 | GO:0044455 | mitochondrial membrane part                                                                   |
| 13              | 36  | 0.80019305087457   | 3.59382041803685e-06  | 0.008  | GO:0042611 | MHC protein complex                                                                           |
| 22              | 62  | 0.787906724016196  | 2.35759581410622e-09  | <0.001 | GO:0006977 | DNA damage response, signal transduction by p53 class mediator resulting in cell cycle arrest |
| 22              | 62  | 0.787906724016196  | 2.35759581410622e-09  | <0.001 | GO:0072401 | signal transduction involved in DNA integrity checkpoint                                      |
| 22              | 62  | 0.787906724016196  | 2.35759581410622e-09  | <0.001 | GO:0072413 | signal transduction involved in mitotic cell cycle checkpoint                                 |
| 22              | 62  | 0.787906724016196  | 2.35759581410622e-09  | <0.001 | GO:0072422 | signal transduction involved in DNA damage checkpoint                                         |
| 22              | 62  | 0.787906724016196  | 2.35759581410622e-09  | <0.001 | GO:0072431 | signal transduction involved in mitotic cell cycle G1/S transition DNA damage checkpoint      |
| 22              | 62  | 0.787906724016196  | 2.35759581410622e-09  | <0.001 | GO:0072474 | signal transduction involved in mitotic cell cycle G1/S checkpoint                            |
| 12              | 34  | 0.785381071713187  | 1.12064061460209e-05  | 0.019  | GO:0006626 | protein targeting to mitochondrion                                                            |
| 31              | 88  | 0.784090641205952  | 1.6208634459227e-12   | <0.001 | GO:0048002 | antigen processing and presentation of peptide antigen                                        |
| 138             | 408 | 0.782753905363391  | 3.18149793786453e-49  | <0.001 | GO:0010467 | gene expression                                                                               |
| 22              | 63  | 0.777286220816123  | 3.33709849401727e-09  | <0.001 | GO:0072395 | signal transduction involved in cell cycle checkpoint                                         |
| 22              | 63  | 0.777286220816123  | 3.33709849401727e-09  | <0.001 | GO:0072404 | signal transduction involved in G1/S transition checkpoint                                    |
| 19              | 55  | 0.770122744469575  | 4.78383728527817e-08  | <0.001 | GO:0071843 | cellular component biogenesis at cellular level                                               |
| 173             | 530 | 0.768759824961379  | 2.97828415371199e-59  | <0.001 | GO:0030529 | ribonucleoprotein complex                                                                     |
| 28              | 82  | 0.763064993637299  | 4.54473457242155e-11  | <0.001 | GO:0002474 | antigen processing and presentation of peptide antigen via MHC class I                        |
| 25              | 75  | 0.747063491558582  | 8.85423589248866e-10  | <0.001 | GO:0006839 | mitochondrial transport                                                                       |

*Continued on next page*

Supplementary Table 3 – Continued from previous page

| N   | X    | LOD               | P                    | P adj  | attrib ID  | attrib name                                                                                    |
|-----|------|-------------------|----------------------|--------|------------|------------------------------------------------------------------------------------------------|
| 23  | 69   | 0.746932600935863 | 4.15847287902749e-09 | <0.001 | GO:0044085 | cellular component biogenesis                                                                  |
| 32  | 97   | 0.741175253071487 | 5.45910901839781e-12 | <0.001 | GO:0015078 | hydrogen ion transmembrane transporter activity                                                |
| 16  | 49   | 0.73399635379054  | 1.30379324163326e-06 | 0.003  | GO:0051258 | protein polymerization                                                                         |
| 15  | 47   | 0.719731376252704 | 3.8551671841249e-06  | 0.008  | GO:0051084 | 'de novo' posttranslational protein folding                                                    |
| 40  | 126  | 0.71784240561212  | 5.25251868522275e-14 | <0.001 | GO:0019882 | antigen processing and presentation                                                            |
| 23  | 73   | 0.710984404898217 | 1.41497713185833e-08 | <0.001 | GO:0071158 | positive regulation of cell cycle arrest                                                       |
| 21  | 67   | 0.707697276637143 | 6.62504934644734e-08 | <0.001 | GO:0051436 | negative regulation of ubiquitin-protein ligase activity involved in mitotic cell cycle        |
| 95  | 311  | 0.705569345151931 | 4.85030590692832e-30 | <0.001 | GO:0048610 | cellular process involved in reproduction                                                      |
| 16  | 52   | 0.696666038434829 | 3.16984759196741e-06 | 0.007  | GO:0006458 | 'de novo' protein folding                                                                      |
| 22  | 72   | 0.691795994094768 | 5.42170060581127e-08 | <0.001 | GO:0051352 | negative regulation of ligase activity                                                         |
| 22  | 72   | 0.691795994094768 | 5.42170060581127e-08 | <0.001 | GO:0051444 | negative regulation of ubiquitin-protein ligase activity                                       |
| 150 | 525  | 0.677439350068986 | 3.32539653823493e-43 | <0.001 | GO:0034621 | cellular macromolecular complex subunit organization                                           |
| 164 | 584  | 0.670332348124673 | 3.54836301881911e-46 | <0.001 | GO:0016071 | mRNA metabolic process                                                                         |
| 23  | 78   | 0.669845547354692 | 5.69629303883152e-08 | <0.001 | GO:0000216 | M/G1 transition of mitotic cell cycle                                                          |
| 21  | 72   | 0.663205782638981 | 2.6219034657749e-07  | <0.001 | GO:0051437 | positive regulation of ubiquitin-protein ligase activity involved in mitotic cell cycle        |
| 16  | 55   | 0.662279533745671 | 7.14593997684204e-06 | 0.014  | GO:0000502 | proteasome complex                                                                             |
| 16  | 55   | 0.662279533745671 | 7.14593997684204e-06 | 0.014  | GO:0006521 | regulation of cellular amino acid metabolic process                                            |
| 25  | 86   | 0.66117774103715  | 2.09408969093921e-08 | <0.001 | GO:0030330 | DNA damage response, signal transduction by p53 class mediator                                 |
| 19  | 67   | 0.64634468268949  | 1.55090946941351e-06 | 0.003  | GO:0033238 | regulation of cellular amine metabolic process                                                 |
| 26  | 92   | 0.644103259424952 | 2.09762058586999e-08 | <0.001 | GO:0072331 | signal transduction by p53 class mediator                                                      |
| 22  | 78   | 0.642874216140607 | 2.62393000307691e-07 | <0.001 | GO:0051439 | regulation of ubiquitin-protein ligase activity involved in mitotic cell cycle                 |
| 19  | 68   | 0.637453778789019 | 1.9842690458222e-06  | 0.005  | GO:0060333 | interferon-gamma-mediated signaling pathway                                                    |
| 22  | 79   | 0.635227361820706 | 3.35087879773373e-07 | <0.001 | GO:0051443 | positive regulation of ubiquitin-protein ligase activity                                       |
| 23  | 83   | 0.63224585989498  | 2.00949230376557e-07 | <0.001 | GO:0051351 | positive regulation of ligase activity                                                         |
| 27  | 98   | 0.62887220631022  | 2.04834672373096e-08 | <0.001 | GO:0006364 | rRNA processing                                                                                |
| 22  | 80   | 0.627711881242392 | 4.25874069739404e-07 | <0.001 | GO:0031145 | anaphase-promoting complex-dependent proteasomal ubiquitin-dependent protein catabolic process |
| 81  | 300  | 0.62621754092227  | 6.64252358742553e-22 | <0.001 | GO:0005743 | mitochondrial inner membrane                                                                   |
| 17  | 63   | 0.617087551763504 | 1.13566498370941e-05 | 0.021  | GO:0006200 | ATP catabolic process                                                                          |
| 24  | 89   | 0.616024095582501 | 1.924740199118e-07   | <0.001 | GO:0031397 | negative regulation of protein ubiquitination                                                  |
| 23  | 86   | 0.61114511085871  | 4.04971652012907e-07 | <0.001 | GO:0016651 | oxidoreductase activity, acting on NADH or NADPH                                               |
| 27  | 103  | 0.599379377993909 | 6.42976552229558e-08 | <0.001 | GO:0016072 | rRNA metabolic process                                                                         |
| 84  | 327  | 0.597134802233134 | 3.86637763010753e-21 | <0.001 | GO:0019866 | organelle inner membrane                                                                       |
| 24  | 93   | 0.590170688226641 | 4.68334780721795e-07 | <0.001 | GO:0051438 | regulation of ubiquitin-protein ligase activity                                                |
| 25  | 97   | 0.589412627207871 | 2.79036812385036e-07 | <0.001 | GO:0051340 | regulation of ligase activity                                                                  |
| 28  | 109  | 0.587562019917053 | 5.91212587104247e-08 | <0.001 | GO:0000084 | S phase of mitotic cell cycle                                                                  |
| 20  | 79   | 0.579289164068354 | 5.71262604161276e-06 | 0.012  | GO:0071346 | cellular response to interferon-gamma                                                          |
| 141 | 582  | 0.575501427143487 | 5.37209201940123e-32 | <0.001 | GO:0071822 | protein complex subunit organization                                                           |
| 35  | 140  | 0.572325037803156 | 2.96216165946153e-09 | <0.001 | GO:0000082 | G1/S transition of mitotic cell cycle                                                          |
| 27  | 110  | 0.561161855618649 | 2.76881959100789e-07 | <0.001 | GO:0042770 | signal transduction in response to DNA damage                                                  |
| 28  | 116  | 0.551583814959451 | 2.4384223848345e-07  | <0.001 | GO:0051320 | S phase                                                                                        |
| 19  | 79   | 0.550001609297223 | 2.1441603106869e-05  | 0.031  | GO:0009206 | purine ribonucleoside triphosphate biosynthetic process                                        |
| 100 | 434  | 0.537107458537325 | 3.65671802133964e-21 | <0.001 | GO:0031966 | mitochondrial membrane                                                                         |
| 31  | 132  | 0.536082594042894 | 1.10062427133423e-07 | <0.001 | GO:0090068 | positive regulation of cell cycle process                                                      |
| 22  | 95   | 0.528168311977894 | 9.49580519250266e-06 | 0.019  | GO:0034341 | response to interferon-gamma                                                                   |
| 84  | 371  | 0.523771651861378 | 1.85277099409276e-17 | <0.001 | GO:0006091 | generation of precursor metabolites and energy                                                 |
| 130 | 595  | 0.513071456988699 | 5.70494731538591e-25 | <0.001 | GO:0005198 | structural molecule activity                                                                   |
| 26  | 116  | 0.50961644963599  | 2.91400334562788e-06 | 0.007  | GO:0031398 | positive regulation of protein ubiquitination                                                  |
| 148 | 687  | 0.508962926945213 | 1.09821996775926e-27 | <0.001 | GO:0044429 | mitochondrial part                                                                             |
| 37  | 168  | 0.500349876744172 | 4.12597162657402e-08 | <0.001 | GO:0000377 | RNA splicing, via transesterification reactions with bulged adenosine as nucleophile           |
| 37  | 168  | 0.500349876744172 | 4.12597162657402e-08 | <0.001 | GO:0000398 | nuclear mRNA splicing, via spliceosome                                                         |
| 36  | 164  | 0.498410796185536 | 6.84854979223404e-08 | <0.001 | GO:0043623 | cellular protein complex assembly                                                              |
| 38  | 175  | 0.492543109861863 | 4.05723893001672e-08 | <0.001 | GO:0000375 | RNA splicing, via transesterification reactions                                                |
| 27  | 126  | 0.484584970787029 | 4.69193568014889e-06 | 0.009  | GO:0046034 | ATP metabolic process                                                                          |
| 175 | 867  | 0.477792444174725 | 4.31717391375335e-29 | <0.001 | GO:0043933 | macromolecular complex subunit organization                                                    |
| 32  | 157  | 0.457121358455519 | 2.03558979738233e-06 | 0.005  | GO:0000209 | protein polyubiquitination                                                                     |
| 57  | 282  | 0.455331541986413 | 3.35174043037384e-10 | <0.001 | GO:0008380 | RNA splicing                                                                                   |
| 87  | 437  | 0.45206487497538  | 1.75634248577746e-14 | <0.001 | GO:0055114 | oxidation-reduction process                                                                    |
| 31  | 154  | 0.450275487651611 | 3.84142188009438e-06 | 0.008  | GO:0031396 | regulation of protein ubiquitination                                                           |
| 32  | 159  | 0.450199742241769 | 2.70953251758628e-06 | 0.006  | GO:0043161 | proteasomal ubiquitin-dependent protein catabolic process                                      |
| 155 | 803  | 0.44828162002615  | 1.17127238506759e-23 | <0.001 | GO:0003723 | RNA binding                                                                                    |
| 32  | 160  | 0.446779218086837 | 3.11868915151585e-06 | 0.007  | GO:0010498 | proteasomal protein catabolic process                                                          |
| 27  | 135  | 0.44673045980076  | 1.79130278352513e-05 | 0.028  | GO:0005774 | vacuolar membrane                                                                              |
| 239 | 1315 | 0.43236771896813  | 1.93513347789966e-32 | <0.001 | GO:0005739 | mitochondrion                                                                                  |
| 39  | 201  | 0.43074480120704  | 6.14144121470793e-07 | <0.001 | GO:0000075 | cell cycle checkpoint                                                                          |
| 43  | 226  | 0.420501515091121 | 2.92681541907647e-07 | <0.001 | GO:0071156 | regulation of cell cycle arrest                                                                |
| 30  | 158  | 0.418585946292244 | 1.82741185723924e-05 | 0.028  | GO:0044437 | vacuolar part                                                                                  |
| 57  | 304  | 0.414291886997772 | 6.22443660977404e-09 | <0.001 | GO:0000278 | mitotic cell cycle                                                                             |
| 73  | 401  | 0.400691520310638 | 1.88837546257743e-10 | <0.001 | GO:0034622 | cellular macromolecular complex assembly                                                       |
| 222 | 1296 | 0.39523148469997  | 2.51837746792813e-26 | <0.001 | GO:0034645 | cellular macromolecule biosynthetic process                                                    |
| 226 | 1327 | 0.392809170439032 | 1.86450696466837e-26 | <0.001 | GO:0009059 | macromolecule biosynthetic process                                                             |
| 334 | 2084 | 0.38137706335828  | 1.33257319443321e-34 | <0.001 | GO:0044267 | cellular protein metabolic process                                                             |
| 334 | 2111 | 0.373898530461539 | 1.84879744335921e-33 | <0.001 | GO:0005829 | cytosol                                                                                        |
| 161 | 961  | 0.370923240921755 | 4.01275183856543e-18 | <0.001 | GO:0032774 | RNA biosynthetic process                                                                       |
| 504 | 3431 | 0.370107849871159 | 4.0461986238786e-44  | <0.001 | GO:0032991 | macromolecular complex                                                                         |

Continued on next page

Supplementary Table 3 – Continued from previous page

| N               | X     | LOD               | P                    | P adj  | attrib ID  | attrib name                                                                          |
|-----------------|-------|-------------------|----------------------|--------|------------|--------------------------------------------------------------------------------------|
| 101             | 602   | 0.361160597240294 | 9.47442144063175e-12 | <0.001 | GO:0006396 | RNA processing                                                                       |
| 766             | 6058  | 0.346864258263512 | 2.31238377684638e-47 | <0.001 | GO:0044444 | cytoplasmic part                                                                     |
| 58              | 357   | 0.337821335867861 | 7.933880428251e-07   | 0.001  | GO:0010564 | regulation of cell cycle process                                                     |
| 59              | 364   | 0.336711582120088 | 6.91212093849837e-07 | 0.001  | GO:0006397 | mRNA processing                                                                      |
| 144             | 911   | 0.336185023040326 | 3.85435400725073e-14 | <0.001 | GO:0005654 | nucleoplasm                                                                          |
| 251             | 1662  | 0.330293674534452 | 1.10940941066799e-21 | <0.001 | GO:0016070 | RNA metabolic process                                                                |
| 313             | 2121  | 0.329217998390912 | 1.18114081249402e-25 | <0.001 | GO:0044249 | cellular biosynthetic process                                                        |
| 316             | 2160  | 0.324822918675263 | 2.91009865940903e-25 | <0.001 | GO:0090304 | nucleic acid metabolic process                                                       |
| 320             | 2232  | 0.313971532133542 | 4.41002855691382e-24 | <0.001 | GO:0009058 | biosynthetic process                                                                 |
| 1145            | 11330 | 0.313948898323752 | 4.59005189412599e-31 | <0.001 | GO:0044424 | intracellular part                                                                   |
| 75              | 485   | 0.313905177878569 | 1.5748417548981e-07  | <0.001 | GO:0022403 | cell cycle phase                                                                     |
| 377             | 2686  | 0.312982629840953 | 4.90694955531477e-27 | <0.001 | GO:0006139 | nucleobase, nucleoside, nucleotide and nucleic acid metabolic process                |
| 686             | 5522  | 0.308771441881537 | 4.1087928647367e-37  | <0.001 | GO:0044446 | intracellular organelle part                                                         |
| 367             | 2644  | 0.304397651421782 | 2.77819227696323e-25 | <0.001 | GO:0019538 | protein metabolic process                                                            |
| 529             | 4046  | 0.302681908190103 | 8.82320727696583e-32 | <0.001 | GO:0044260 | cellular macromolecule metabolic process                                             |
| 689             | 5601  | 0.302589536132723 | 8.22904448857063e-36 | <0.001 | GO:0044422 | organelle part                                                                       |
| 712             | 5867  | 0.299367116917043 | 1.88823085526176e-35 | <0.001 | GO:0044237 | cellular metabolic process                                                           |
| 135             | 945   | 0.280373762273502 | 3.82813590337554e-10 | <0.001 | GO:0022414 | reproductive process                                                                 |
| 74              | 511   | 0.279376163393885 | 2.44628059184637e-06 | 0.006  | GO:0006974 | response to DNA damage stimulus                                                      |
| 969             | 9102  | 0.277956512781225 | 5.11225805494553e-30 | <0.001 | GO:0043229 | intracellular organelle                                                              |
| 969             | 9117  | 0.276313895789093 | 1.11162671743124e-29 | <0.001 | GO:0043226 | organelle                                                                            |
| 403             | 3093  | 0.273819161695768 | 1.68049396494688e-22 | <0.001 | GO:0034641 | cellular nitrogen compound metabolic process                                         |
| 108             | 765   | 0.270319977503456 | 4.55991397471596e-08 | <0.001 | GO:0022402 | cell cycle process                                                                   |
| 99              | 701   | 0.269327927902864 | 1.66323414881123e-07 | <0.001 | GO:0007049 | cell cycle                                                                           |
| 410             | 3199  | 0.265219890086891 | 1.5194034851802e-21  | <0.001 | GO:0006807 | nitrogen compound metabolic process                                                  |
| 556             | 4601  | 0.25742146969207  | 1.8068455687858e-24  | <0.001 | GO:0043170 | macromolecule metabolic process                                                      |
| 285             | 2171  | 0.257317984548616 | 7.98160838856529e-16 | <0.001 | GO:0043228 | non-membrane-bounded organelle                                                       |
| 285             | 2171  | 0.257317984548616 | 7.98160838856529e-16 | <0.001 | GO:0043232 | intracellular non-membrane-bounded organelle                                         |
| 69              | 497   | 0.256916076214485 | 2.21805085904211e-05 | 0.031  | GO:0005730 | nucleolus                                                                            |
| 85              | 622   | 0.2504348652183   | 4.78113517987455e-06 | 0.01   | GO:0006259 | DNA metabolic process                                                                |
| 744             | 6632  | 0.249054934285073 | 1.58723972093304e-25 | <0.001 | GO:0008152 | metabolic process                                                                    |
| 293             | 2272  | 0.248502561040477 | 3.01319156248601e-15 | <0.001 | GO:0071842 | cellular component organization at cellular level                                    |
| 295             | 2299  | 0.245967084736522 | 4.57315463821616e-15 | <0.001 | GO:0071841 | cellular component organization or biogenesis at cellular level                      |
| 98              | 729   | 0.243379241039335 | 1.87437352876668e-06 | 0.004  | GO:0065003 | macromolecular complex assembly                                                      |
| 93              | 694   | 0.241149602052021 | 3.93342779914606e-06 | 0.008  | GO:0016491 | oxidoreductase activity                                                              |
| 274             | 2153  | 0.238023679234234 | 1.58478501985632e-13 | <0.001 | GO:0044428 | nuclear part                                                                         |
| 871             | 8242  | 0.235473646680484 | 5.82916610504252e-23 | <0.001 | GO:0043227 | membrane-bounded organelle                                                           |
| 870             | 8238  | 0.234562637103022 | 8.38290144947865e-23 | <0.001 | GO:0043231 | intracellular membrane-bounded organelle                                             |
| 99              | 751   | 0.233280218653404 | 3.94595885765465e-06 | 0.008  | GO:0046907 | intracellular transport                                                              |
| 665             | 5992  | 0.221831084147262 | 3.46559295245285e-20 | <0.001 | GO:0044238 | primary metabolic process                                                            |
| 102             | 803   | 0.214295076083374 | 1.41199427931906e-05 | 0.022  | GO:0033554 | cellular response to stress                                                          |
| 99              | 783   | 0.211573308398039 | 2.28182618638875e-05 | 0.031  | GO:0071844 | cellular component assembly at cellular level                                        |
| 344             | 2896  | 0.208867137566652 | 8.16942218480433e-13 | <0.001 | GO:0016043 | cellular component organization                                                      |
| 346             | 2923  | 0.20711459632924  | 1.09506306063704e-12 | <0.001 | GO:0071840 | cellular component organization or biogenesis                                        |
| 329             | 2821  | 0.195993854311548 | 3.24914520945555e-11 | <0.001 | GO:0043234 | protein complex                                                                      |
| 237             | 2006  | 0.191345208630818 | 1.2625912051491e-08  | <0.001 | GO:0031090 | organelle membrane                                                                   |
| 1026            | 10840 | 0.168964395995212 | 1.74282758664301e-11 | <0.001 | GO:0009987 | cellular process                                                                     |
| 485             | 4933  | 0.108855314264424 | 1.27790612421947e-05 | 0.021  | GO:0005737 | cytoplasm                                                                            |
| <b>Module 2</b> |       |                   |                      |        |            |                                                                                      |
| 5               | 9     | 1.4353697859032   | 1.61126889116162e-05 | 0.024  | GO:0008139 | nuclear localization sequence binding                                                |
| 7               | 20    | 1.09388232798139  | 1.28535977541801e-05 | 0.018  | GO:0051983 | regulation of chromosome segregation                                                 |
| 29              | 168   | 0.684180963922458 | 1.54004341495467e-10 | <0.001 | GO:0000377 | RNA splicing, via transesterification reactions with bulged adenosine as nucleophile |
| 29              | 168   | 0.684180963922458 | 1.54004341495467e-10 | <0.001 | GO:0000398 | nuclear mRNA splicing, via spliceosome                                               |
| 30              | 175   | 0.680816140112517 | 8.87046264555359e-11 | <0.001 | GO:0000375 | RNA splicing, via transesterification reactions                                      |
| 38              | 282   | 0.558803234506848 | 4.52064927189642e-10 | <0.001 | GO:0008380 | RNA splicing                                                                         |
| 19              | 141   | 0.555278310629005 | 1.0380427172764e-05  | 0.017  | GO:0005681 | spliceosomal complex                                                                 |
| 44              | 364   | 0.505813785001266 | 6.61426439925337e-10 | <0.001 | GO:0006397 | mRNA processing                                                                      |
| 66              | 602   | 0.464516339086547 | 2.77728663822659e-12 | <0.001 | GO:0006396 | RNA processing                                                                       |
| 32              | 288   | 0.460440562314741 | 9.75520192342185e-07 | 0.002  | GO:0051301 | cell division                                                                        |
| 62              | 584   | 0.446895852037615 | 5.12932632405468e-11 | <0.001 | GO:0016071 | mRNA metabolic process                                                               |
| 52              | 497   | 0.436204344115675 | 3.27009886602057e-09 | <0.001 | GO:0005730 | nucleolus                                                                            |
| 33              | 351   | 0.378532533073338 | 2.40744755831632e-05 | 0.041  | GO:0044419 | interspecies interaction between organisms                                           |
| 172             | 2153  | 0.343432744866356 | 1.75600448691817e-16 | <0.001 | GO:0044428 | nuclear part                                                                         |
| 42              | 485   | 0.340242072283576 | 1.48503818757099e-05 | 0.022  | GO:0022403 | cell cycle phase                                                                     |
| 40              | 462   | 0.339711208044223 | 2.3766092104457e-05  | 0.04   | GO:0044265 | cellular macromolecule catabolic process                                             |
| 60              | 701   | 0.339160869975101 | 3.23571054989503e-07 | 0.001  | GO:0007049 | cell cycle                                                                           |
| 41              | 475   | 0.338432406345785 | 2.02295400933921e-05 | 0.034  | GO:0044427 | chromosomal part                                                                     |
| 68              | 803   | 0.336220984744933 | 7.65671927087538e-08 | <0.001 | GO:0003723 | RNA binding                                                                          |
| 76              | 911   | 0.331218188924209 | 2.33893486630229e-08 | <0.001 | GO:0005654 | nucleoplasm                                                                          |
| 43              | 511   | 0.326468203963555 | 2.35721317636639e-05 | 0.04   | GO:0006974 | response to DNA damage stimulus                                                      |
| 44              | 530   | 0.320096499039325 | 2.63517822318679e-05 | 0.043  | GO:0030529 | ribonucleoprotein complex                                                            |
| 590             | 11330 | 0.307725883035438 | 1.0960786202461e-16  | <0.001 | GO:0044424 | intracellular part                                                                   |
| 128             | 1662  | 0.307694952226285 | 4.08803837662614e-11 | <0.001 | GO:0016070 | RNA metabolic process                                                                |
| 51              | 644   | 0.298647909108822 | 2.19483688586676e-05 | 0.035  | GO:0051726 | regulation of cell cycle                                                             |
| 58              | 765   | 0.278965516407217 | 2.16486041316539e-05 | 0.035  | GO:0022402 | cell cycle process                                                                   |
| 152             | 2160  | 0.26839415907082  | 3.64000656801177e-10 | <0.001 | GO:0090304 | nucleic acid metabolic process                                                       |

Continued on next page

Supplementary Table 3 – Continued from previous page

| N               | X     | LOD               | P                    | P adj  | attrib ID  | attrib name                                                           |
|-----------------|-------|-------------------|----------------------|--------|------------|-----------------------------------------------------------------------|
| 151             | 2171  | 0.261862930845385 | 9.73365119250831e-10 | <0.001 | GO:0043228 | non-membrane-bounded organelle                                        |
| 151             | 2171  | 0.261862930845385 | 9.73365119250831e-10 | <0.001 | GO:0043232 | intracellular non-membrane-bounded organelle                          |
| 340             | 5601  | 0.253862278441637 | 1.31291950589379e-14 | <0.001 | GO:0044422 | organelle part                                                        |
| 492             | 9102  | 0.250272137858337 | 4.30276700995675e-14 | <0.001 | GO:0043229 | intracellular organelle                                               |
| 492             | 9117  | 0.248695876930274 | 6.1868252491176e-14  | <0.001 | GO:0043226 | organelle                                                             |
| 178             | 2686  | 0.244422165955063 | 9.13870908091538e-10 | <0.001 | GO:0006139 | nucleobase, nucleoside, nucleotide and nucleic acid metabolic process |
| 332             | 5522  | 0.243714592261868 | 1.60539211670902e-13 | <0.001 | GO:0044446 | intracellular organelle part                                          |
| 200             | 3093  | 0.237932293242852 | 4.47608150862857e-10 | <0.001 | GO:0034641 | cellular nitrogen compound metabolic process                          |
| 204             | 3199  | 0.231396211719754 | 9.30860336734763e-10 | <0.001 | GO:0006807 | nitrogen compound metabolic process                                   |
| 251             | 4046  | 0.231319523511239 | 5.73866479299139e-11 | <0.001 | GO:0044260 | cellular macromolecule metabolic process                              |
| 449             | 8238  | 0.229250611380594 | 1.64011741005672e-12 | <0.001 | GO:0043231 | intracellular membrane-bounded organelle                              |
| 449             | 8242  | 0.228829514942579 | 1.79770699314044e-12 | <0.001 | GO:0043227 | membrane-bounded organelle                                            |
| 338             | 5867  | 0.217174729554922 | 3.40468652787424e-11 | <0.001 | GO:0044237 | cellular metabolic process                                            |
| 290             | 4933  | 0.212021859434929 | 3.43579358808612e-10 | <0.001 | GO:0005737 | cytoplasm                                                             |
| 302             | 5211  | 0.207147691965801 | 5.67529432661151e-10 | <0.001 | GO:0005634 | nucleus                                                               |
| 111             | 1743  | 0.20458125474222  | 1.63777858635897e-05 | 0.024  | GO:0043412 | macromolecule modification                                            |
| 266             | 4601  | 0.19325730820235  | 1.836736540134e-08   | <0.001 | GO:0043170 | macromolecule metabolic process                                       |
| 363             | 6632  | 0.19076943584687  | 3.42220660572212e-09 | <0.001 | GO:0008152 | metabolic process                                                     |
| 328             | 5992  | 0.177849130815706 | 4.97783632875206e-08 | <0.001 | GO:0044238 | primary metabolic process                                             |
| 174             | 3011  | 0.167727278807245 | 1.68644378475076e-05 | 0.031  | GO:0010468 | regulation of gene expression                                         |
| 315             | 6058  | 0.137883228026376 | 2.01099934629971e-05 | 0.034  | GO:0044444 | cytoplasmic part                                                      |
| <b>Module 3</b> |       |                   |                      |        |            |                                                                       |
| 8               | 25    | 1.12174413109538  | 1.6195735819603e-06  | 0.002  | GO:0051539 | 4 iron, 4 sulfur cluster binding                                      |
| 10              | 50    | 0.84991907137197  | 9.0161990136549e-06  | 0.021  | GO:0051536 | iron-sulfur cluster binding                                           |
| 10              | 50    | 0.84991907137197  | 9.0161990136549e-06  | 0.021  | GO:0051540 | metal cluster binding                                                 |
| 25              | 229   | 0.538541159788376 | 7.47720629054225e-07 | <0.001 | GO:0051186 | cofactor metabolic process                                            |
| 271             | 6058  | 0.166074173009115 | 2.78569620584793e-06 | 0.005  | GO:0044444 | cytoplasmic part                                                      |
| 453             | 11330 | 0.161739187745443 | 1.86883086496289e-05 | 0.037  | GO:0044424 | intracellular part                                                    |
| <b>Module 4</b> |       |                   |                      |        |            |                                                                       |
| 13              | 97    | 0.672080308928874 | 2.01477245308462e-05 | 0.047  | GO:0005741 | mitochondrial outer membrane                                          |
| 32              | 434   | 0.38218093135728  | 2.59169277455588e-05 | 0.05   | GO:0031966 | mitochondrial membrane                                                |
| 267             | 6058  | 0.209635231286387 | 1.1954907403548e-08  | <0.001 | GO:0044444 | cytoplasmic part                                                      |
| 430             | 11330 | 0.189685955412112 | 1.81000117796974e-06 | 0.003  | GO:0044424 | intracellular part                                                    |
| 266             | 6401  | 0.167667578490431 | 3.97412665691163e-06 | 0.008  | GO:0005515 | protein binding                                                       |
| 211             | 4933  | 0.164971820301435 | 1.42128334658729e-05 | 0.024  | GO:0005737 | cytoplasm                                                             |
| <b>Module 5</b> |       |                   |                      |        |            |                                                                       |
| 7               | 33    | 1.07143232855034  | 1.02220662682094e-05 | 0.013  | GO:0006695 | cholesterol biosynthetic process                                      |
| 34              | 602   | 0.418505790853493 | 2.98488408837491e-06 | 0.005  | GO:0006396 | RNA processing                                                        |
| 42              | 803   | 0.386267510008865 | 1.45554203385518e-06 | 0.003  | GO:0003723 | RNA binding                                                           |
| 35              | 678   | 0.376246720272173 | 1.50758252204483e-05 | 0.044  | GO:0044451 | nucleoplasm part                                                      |
| 74              | 1662  | 0.32717492580596  | 8.08519738698485e-08 | <0.001 | GO:0016070 | RNA metabolic process                                                 |
| 92              | 2160  | 0.316438423646489 | 1.22530842680858e-08 | <0.001 | GO:0090304 | nucleic acid metabolic process                                        |
| 109             | 2686  | 0.302719794834586 | 5.16088110052742e-09 | <0.001 | GO:0006139 | nucleobase, nucleoside, nucleotide and nucleic acid metabolic process |
| 204             | 5867  | 0.290215289462742 | 2.42264491073003e-11 | <0.001 | GO:0044237 | cellular metabolic process                                            |
| 86              | 2153  | 0.279472007299701 | 7.06167821789315e-07 | 0.001  | GO:0044428 | nuclear part                                                          |
| 258             | 8238  | 0.273394775085421 | 3.30641000342457e-10 | <0.001 | GO:0043231 | intracellular membrane-bounded organelle                              |
| 258             | 8242  | 0.272981776660256 | 3.51091215759553e-10 | <0.001 | GO:0043227 | membrane-bounded organelle                                            |
| 320             | 11330 | 0.270756828023873 | 2.59329735790549e-08 | <0.001 | GO:0044424 | intracellular part                                                    |
| 117             | 3093  | 0.27018336330746  | 6.56451317805923e-08 | <0.001 | GO:0034641 | cellular nitrogen compound metabolic process                          |
| 120             | 3199  | 0.267574242908932 | 6.5838967556536e-08  | <0.001 | GO:0006807 | nitrogen compound metabolic process                                   |
| 274             | 9102  | 0.259905768442695 | 3.97303688891244e-09 | <0.001 | GO:0043229 | intracellular organelle                                               |
| 145             | 4046  | 0.258957848074746 | 2.58310912976049e-08 | <0.001 | GO:0044260 | cellular macromolecule metabolic process                              |
| 274             | 9117  | 0.258358056899225 | 4.89474559380795e-09 | <0.001 | GO:0043226 | organelle                                                             |
| 186             | 5522  | 0.252387490202399 | 8.07568575286686e-09 | <0.001 | GO:0044446 | intracellular organelle part                                          |
| 198             | 5992  | 0.249866826361352 | 8.08174185764168e-09 | <0.001 | GO:0044238 | primary metabolic process                                             |
| 187             | 5601  | 0.24739223761693  | 1.47932676168125e-08 | <0.001 | GO:0044422 | organelle part                                                        |
| 212             | 6632  | 0.239108907629557 | 2.58709518947142e-08 | <0.001 | GO:0008152 | metabolic process                                                     |
| 155             | 4601  | 0.229008499074375 | 4.23085771940228e-07 | <0.001 | GO:0043170 | macromolecule metabolic process                                       |
| 169             | 5211  | 0.214851860778109 | 1.14557794256476e-06 | 0.002  | GO:0005634 | nucleus                                                               |
| 188             | 6058  | 0.198889582472837 | 3.92901841156595e-06 | 0.007  | GO:0044444 | cytoplasmic part                                                      |
| <b>Module 6</b> |       |                   |                      |        |            |                                                                       |
| 5               | 17    | 1.35877762485371  | 1.27620339057008e-05 | 0.027  | GO:0005680 | anaphase-promoting complex                                            |
| 7               | 27    | 1.28109582819072  | 5.64148602718057e-07 | 0.001  | GO:0007094 | mitotic cell cycle spindle assembly checkpoint                        |
| 7               | 28    | 1.26038559665177  | 7.3990905561597e-07  | 0.004  | GO:0045841 | negative regulation of mitotic metaphase/anaphase transition          |
| 7               | 28    | 1.26038559665177  | 7.3990905561597e-07  | 0.004  | GO:0071173 | spindle assembly checkpoint                                           |
| 7               | 28    | 1.26038559665177  | 7.3990905561597e-07  | 0.004  | GO:0071174 | mitotic cell cycle spindle checkpoint                                 |
| 7               | 30    | 1.22170492439836  | 1.23095671972835e-06 | 0.005  | GO:0031577 | spindle checkpoint                                                    |
| 7               | 33    | 1.16944999653699  | 2.45864548304647e-06 | 0.007  | GO:0030071 | regulation of mitotic metaphase/anaphase transition                   |
| 7               | 33    | 1.16944999653699  | 2.45864548304647e-06 | 0.007  | GO:0045839 | negative regulation of mitosis                                        |
| 7               | 33    | 1.16944999653699  | 2.45864548304647e-06 | 0.007  | GO:0051784 | negative regulation of nuclear division                               |
| 18              | 288   | 0.561314315261963 | 1.18040781186384e-05 | 0.026  | GO:0051301 | cell division                                                         |
| 204             | 8238  | 0.251051414092351 | 1.67494198073935e-07 | <0.001 | GO:0043231 | intracellular membrane-bounded organelle                              |
| 204             | 8242  | 0.250640665799907 | 1.75182061275321e-07 | <0.001 | GO:0043227 | membrane-bounded organelle                                            |
| 216             | 9102  | 0.231422137926905 | 1.80780431583472e-06 | 0.006  | GO:0043229 | intracellular organelle                                               |
| 216             | 9117  | 0.229882447927919 | 2.1050968158218e-06  | 0.007  | GO:0043226 | organelle                                                             |

Continued on next page



Supplementary Table 3 – Continued from previous page

| N                | X     | LOD               | P                    | P adj  | attrib ID  | attrib name                                            |
|------------------|-------|-------------------|----------------------|--------|------------|--------------------------------------------------------|
| 135              | 5211  | 0.208102879924293 | 2.05983907876377e-05 | 0.037  | GO:0005634 | nucleus                                                |
| <b>Module 8</b>  |       |                   |                      |        |            |                                                        |
| 3                | 4     | 2.15674334421143  | 1.64587987532083e-05 | 0.032  | GO:0048280 | vesicle fusion with Golgi apparatus                    |
| 5                | 21    | 1.31441473215979  | 1.74263922633301e-05 | 0.037  | GO:0032201 | telomere maintenance via semi-conservative replication |
| 8                | 35    | 1.28611338854416  | 6.73739625327887e-08 | 0.001  | GO:0006261 | DNA-dependent DNA replication                          |
| 5                | 23    | 1.26467580787443  | 2.80631885844604e-05 | 0.047  | GO:0000722 | telomere maintenance via recombination                 |
| 6                | 34    | 1.15088257068433  | 1.54366414227154e-05 | 0.024  | GO:0010833 | telomere maintenance via telomere lengthening          |
| 8                | 69    | 0.935700200428791 | 1.48897081315905e-05 | 0.024  | GO:0009411 | response to UV                                         |
| 15               | 170   | 0.802685314737047 | 1.12157969185014e-07 | 0.001  | GO:0006260 | DNA replication                                        |
| 23               | 511   | 0.490955055548057 | 9.92989139304257e-06 | 0.019  | GO:0006974 | response to DNA damage stimulus                        |
| 42               | 1327  | 0.340009071984013 | 1.98581541366046e-05 | 0.04   | GO:0009059 | macromolecule biosynthetic process                     |
| 41               | 1296  | 0.338927033802861 | 2.55286781292076e-05 | 0.043  | GO:0034645 | cellular macromolecule biosynthetic process            |
| 63               | 2160  | 0.318931266474648 | 1.75657887022238e-06 | 0.002  | GO:0090304 | nucleic acid metabolic process                         |
| 128              | 5211  | 0.298549267749992 | 1.8238869432011e-08  | <0.001 | GO:0005634 | nucleus                                                |
| 60               | 2153  | 0.292881834504383 | 1.38556689832231e-05 | 0.023  | GO:0044428 | nuclear part                                           |
| 100              | 4046  | 0.267683010803659 | 1.63739514172819e-06 | 0.002  | GO:0044260 | cellular macromolecule metabolic process               |
| 174              | 8238  | 0.263181580222692 | 4.66457450693039e-07 | 0.002  | GO:0043231 | intracellular membrane-bounded organelle               |
| 174              | 8242  | 0.262771810066496 | 4.85332067450148e-07 | 0.002  | GO:0043227 | membrane-bounded organelle                             |
| 107              | 4601  | 0.239108491634204 | 1.07913454880254e-05 | 0.02   | GO:0043170 | macromolecule metabolic process                        |
| 182              | 9102  | 0.22936103280645  | 1.25445382233209e-05 | 0.02   | GO:0043229 | intracellular organelle                                |
| 182              | 9117  | 0.227824532081016 | 1.42589555343329e-05 | 0.023  | GO:0043226 | organelle                                              |
| <b>Module 10</b> |       |                   |                      |        |            |                                                        |
| 190              | 11330 | 0.26726174432135  | 1.71596077751879e-05 | 0.032  | GO:0044424 | intracellular part                                     |
| <b>Module 14</b> |       |                   |                      |        |            |                                                        |
| 20               | 1065  | 0.528808096440223 | 1.73407898205248e-05 | 0.032  | GO:0044248 | cellular catabolic process                             |
| 33               | 2111  | 0.479914638806195 | 1.06712795272747e-06 | <0.001 | GO:0005829 | cytosol                                                |
| 39               | 3093  | 0.388858388574349 | 1.71524549827148e-05 | 0.032  | GO:0034641 | cellular nitrogen compound metabolic process           |
| 42               | 3431  | 0.382865420385352 | 1.42566606441697e-05 | 0.023  | GO:0032991 | macromolecular complex                                 |
| 60               | 5867  | 0.34446562764228  | 2.14508227397237e-05 | 0.032  | GO:0044237 | cellular metabolic process                             |
| 61               | 6058  | 0.338468119322826 | 2.84679848054408e-05 | 0.041  | GO:0044444 | cytoplasmic part                                       |

**Supplementary Table 4: Full list of Gene Ontology categories enriched in coexpressed gene modules derived from a mirrored analysis of pool/split datasets.** Gene Ontology enrichment in modules was assessed using FuncAssociate2.0 (Berriz et al., 2009). A total of 16 modules were detected

| N               | X    | LOD               | P                    | P adj  | attrib ID  | attrib name                                                |
|-----------------|------|-------------------|----------------------|--------|------------|------------------------------------------------------------|
| <b>Module 1</b> |      |                   |                      |        |            |                                                            |
| 13              | 272  | 0.693095067094612 | 1.02007791233691e-05 | 0.011  | GO:0006511 | ubiquitin-dependent protein catabolic process              |
| 13              | 279  | 0.68135455023532  | 1.33744095433394e-05 | 0.018  | GO:0019941 | modification-dependent protein catabolic process           |
| 13              | 282  | 0.676415542913035 | 1.49811431033085e-05 | 0.019  | GO:0043632 | modification-dependent macromolecule catabolic process     |
| 13              | 289  | 0.665098403683509 | 1.94061972015811e-05 | 0.024  | GO:0051603 | proteolysis involved in cellular protein catabolic process |
| 17              | 462  | 0.57616161468926  | 1.43352606692572e-05 | 0.018  | GO:0044265 | cellular macromolecule catabolic process                   |
| 19              | 545  | 0.553524223505169 | 9.47597917000467e-06 | 0.009  | GO:0009057 | macromolecule catabolic process                            |
| 29              | 1065 | 0.451649915259144 | 5.44374777913331e-06 | 0.007  | GO:0044248 | cellular catabolic process                                 |
| 50              | 2153 | 0.408372755551646 | 1.54662372619939e-07 | j0.001 | GO:0044428 | nuclear part                                               |
| 38              | 1647 | 0.385284888523943 | 8.15733567738168e-06 | 0.007  | GO:0006464 | protein modification process                               |
| 39              | 1743 | 0.371699071795165 | 1.23788499774497e-05 | 0.013  | GO:0043412 | macromolecule modification                                 |
| 75              | 4046 | 0.33429458014633  | 5.14482381026089e-07 | j0.001 | GO:0044260 | cellular macromolecule metabolic process                   |
| 93              | 5522 | 0.313764330996431 | 7.30843785397851e-07 | j0.001 | GO:0044446 | intracellular organelle part                               |
| 93              | 5601 | 0.304538452915935 | 1.46302793919708e-06 | 0.002  | GO:0044422 | organelle part                                             |
| 79              | 4601 | 0.296962579640552 | 5.07939215329675e-06 | 0.005  | GO:0043170 | macromolecule metabolic process                            |
| 95              | 5867 | 0.292386561578076 | 3.34586773855207e-06 | 0.003  | GO:0044237 | cellular metabolic process                                 |
| 104             | 6632 | 0.29101237790736  | 3.17018865849522e-06 | 0.003  | GO:0008152 | metabolic process                                          |
| 96              | 5992 | 0.287467105557634 | 4.64261918086881e-06 | 0.005  | GO:0044238 | primary metabolic process                                  |
| <b>Module 3</b> |      |                   |                      |        |            |                                                            |
| 5               | 16   | 2.01970458115929  | 9.51160735183834e-09 | j0.001 | GO:0016254 | preassembly of GPI anchor in ER membrane                   |
| 6               | 30   | 1.76902612001682  | 5.55484070660725e-09 | j0.001 | GO:0018410 | C-terminal protein amino acid modification                 |
| 5               | 25   | 1.76842092954302  | 1.11841352190966e-07 | 0.001  | GO:0006501 | C-terminal protein lipidation                              |
| 5               | 49   | 1.43120717990547  | 3.66720733305651e-06 | 0.006  | GO:0006497 | protein lipidation                                         |
| 7               | 131  | 1.12827314119116  | 3.16442237797319e-06 | 0.005  | GO:0043687 | post-translational protein modification                    |
| 22              | 1743 | 0.516764340612836 | 1.71498823237458e-05 | 0.023  | GO:0043412 | macromolecule modification                                 |
| <b>Module 9</b> |      |                   |                      |        |            |                                                            |
| 19              | 2084 | 0.56988964370998  | 2.20527274140205e-05 | 0.031  | GO:0044267 | cellular protein metabolic process                         |

**Supplementary Table 5: Novel splice junctions discovered in spikes.** No novel junctions are expected to be discovered in spike-in sequences, therefore such junctions are almost certainly experimental artifacts. Shown is the number of collapsed fragments supporting each junction in a library

| chr                 | left | right | strand | 12517 GM12878 30 cells | 12520 10 cells | 12820 cell 208 | 12821 pool/split 5 | 12823 pool/split 7 | 12824 pool/split 8 | 13268 217 pool/split 1 | 13269 218 pool/split 2 | 13270 219 pool/split 3 | 13271 220 pool/split 4 | 13273 226 pool/split 10 | 13278 cell 204 | 13280 232 pool/split |
|---------------------|------|-------|--------|------------------------|----------------|----------------|--------------------|--------------------|--------------------|------------------------|------------------------|------------------------|------------------------|-------------------------|----------------|----------------------|
| AP2                 | 308  | 1191  | -      | 0                      | 0              | 0              | 0                  | 24                 | 0                  | 0                      | 0                      | 0                      | 0                      | 0                       | 0              | 0                    |
| AP2                 | 357  | 1205  | -      | 1                      | 0              | 0              | 0                  | 0                  | 0                  | 0                      | 0                      | 0                      | 0                      | 0                       | 0              | 0                    |
| AP2                 | 365  | 1213  | +      | 2                      | 0              | 0              | 0                  | 0                  | 0                  | 0                      | 0                      | 0                      | 0                      | 0                       | 0              | 0                    |
| AP2                 | 380  | 476   | +      | 0                      | 44             | 0              | 0                  | 0                  | 0                  | 0                      | 0                      | 0                      | 0                      | 0                       | 0              | 0                    |
| AP2                 | 380  | 520   | +      | 0                      | 0              | 0              | 28                 | 0                  | 0                  | 0                      | 0                      | 0                      | 0                      | 0                       | 0              | 0                    |
| Lambda 9786 clone F | 5092 | 5172  | -      | 0                      | 0              | 0              | 0                  | 0                  | 0                  | 0                      | 38                     | 0                      | 0                      | 0                       | 0              | 0                    |
| OBF5                | 334  | 466   | +      | 0                      | 0              | 0              | 39                 | 0                  | 0                  | 0                      | 0                      | 0                      | 0                      | 0                       | 0              | 0                    |
| OBF5                | 376  | 607   | +      | 0                      | 0              | 0              | 0                  | 0                  | 0                  | 0                      | 0                      | 0                      | 0                      | 1                       | 0              | 0                    |
| OBF5                | 381  | 612   | +      | 0                      | 0              | 0              | 0                  | 0                  | 0                  | 0                      | 0                      | 0                      | 0                      | 47                      | 0              | 0                    |
| OBF5                | 394  | 893   | +      | 0                      | 0              | 0              | 0                  | 0                  | 0                  | 0                      | 0                      | 3                      | 0                      | 0                       | 0              | 0                    |
| OBF5                | 411  | 860   | +      | 0                      | 0              | 1              | 0                  | 0                  | 0                  | 0                      | 0                      | 0                      | 0                      | 0                       | 0              | 0                    |
| OBF5                | 413  | 862   | +      | 0                      | 0              | 39             | 0                  | 0                  | 0                  | 0                      | 0                      | 0                      | 0                      | 0                       | 0              | 0                    |
| OBF5                | 417  | 526   | -      | 0                      | 0              | 0              | 28                 | 0                  | 0                  | 0                      | 0                      | 0                      | 0                      | 0                       | 0              | 0                    |
| OBF5                | 558  | 724   | -      | 0                      | 0              | 0              | 0                  | 0                  | 0                  | 45                     | 0                      | 0                      | 0                      | 0                       | 0              | 0                    |
| OBF5                | 558  | 988   | -      | 0                      | 0              | 0              | 0                  | 0                  | 0                  | 0                      | 0                      | 0                      | 44                     | 0                       | 0              | 0                    |
| OBF5                | 563  | 1000  | +      | 0                      | 0              | 0              | 0                  | 0                  | 0                  | 0                      | 0                      | 0                      | 0                      | 0                       | 0              | 2                    |
| OBF5                | 572  | 806   | +      | 0                      | 0              | 0              | 0                  | 0                  | 17                 | 0                      | 0                      | 0                      | 0                      | 0                       | 0              | 0                    |
| OBF5                | 572  | 848   | +      | 0                      | 0              | 18             | 0                  | 0                  | 0                  | 0                      | 0                      | 0                      | 0                      | 0                       | 0              | 0                    |
| OBF5                | 708  | 893   | +      | 0                      | 0              | 0              | 0                  | 0                  | 31                 | 0                      | 0                      | 0                      | 0                      | 0                       | 0              | 0                    |
| OBF5                | 708  | 992   | +      | 0                      | 0              | 0              | 0                  | 0                  | 0                  | 0                      | 0                      | 0                      | 0                      | 0                       | 0              | 0                    |
| VATG3               | 28   | 277   | +      | 0                      | 0              | 0              | 6                  | 0                  | 0                  | 0                      | 0                      | 0                      | 0                      | 0                       | 36             | 0                    |

**Supplementary Table 6: Gene Ontology categories enriched in genes displaying splice site switching between individual cells.** Gene Ontology enrichment was assessed using FuncAssociate2.0 (Berriz et al., 2009).

| N   | X     | LOD               | P                     | P adj  | attrib ID  | attrib name                                                                          |
|-----|-------|-------------------|-----------------------|--------|------------|--------------------------------------------------------------------------------------|
| 7   | 18    | 1.60434572330591  | 7.81336494766272e-09  | <0.001 | GO:0030530 | heterogeneous nuclear ribonucleoprotein complex                                      |
| 6   | 22    | 1.38371032623861  | 1.0731443930779e-06   | <0.001 | GO:0000313 | organellar ribosome                                                                  |
| 6   | 22    | 1.38371032623861  | 1.0731443930779e-06   | <0.001 | GO:0005761 | mitochondrial ribosome                                                               |
| 9   | 62    | 1.04144125075565  | 6.88184640563181e-07  | <0.001 | GO:0015934 | large ribosomal subunit                                                              |
| 10  | 79    | 0.972456465728994 | 6.10664091150019e-07  | <0.001 | GO:0071013 | catalytic step 2 spliceosome                                                         |
| 19  | 154   | 0.964236659283489 | 7.8714230213414e-12   | <0.001 | GO:0003735 | structural constituent of ribosome                                                   |
| 20  | 175   | 0.927300715975638 | 9.173544662099906e-12 | <0.001 | GO:0000375 | RNA splicing, via transesterification reactions                                      |
| 19  | 168   | 0.92117404141009  | 3.70476457645963e-11  | <0.001 | GO:0000377 | RNA splicing, via transesterification reactions with bulged adenosine as nucleophile |
| 19  | 168   | 0.92117404141009  | 3.70476457645963e-11  | <0.001 | GO:0000398 | nuclear mRNA splicing, via spliceosome                                               |
| 15  | 141   | 0.888071082569232 | 1.03966880671155e-08  | <0.001 | GO:0005681 | spliceosomal complex                                                                 |
| 16  | 159   | 0.861650703193511 | 7.48121263599197e-09  | <0.001 | GO:0005840 | ribosome                                                                             |
| 23  | 243   | 0.838249153771732 | 1.25842265057125e-11  | <0.001 | GO:0006412 | translation                                                                          |
| 46  | 530   | 0.826167157208287 | 9.02684713922854e-21  | <0.001 | GO:0030529 | ribonucleoprotein complex                                                            |
| 23  | 282   | 0.766509674540248 | 2.54718803100937e-10  | <0.001 | GO:0008380 | RNA splicing                                                                         |
| 26  | 364   | 0.706261794294909 | 3.04918522987691e-10  | <0.001 | GO:0006397 | mRNA processing                                                                      |
| 28  | 408   | 0.689368099675319 | 1.53848128981224e-10  | <0.001 | GO:0010467 | gene expression                                                                      |
| 38  | 584   | 0.67579720156425  | 3.18781787872945e-13  | <0.001 | GO:0016071 | mRNA metabolic process                                                               |
| 47  | 803   | 0.636519902260068 | 1.87953754853827e-14  | <0.001 | GO:0003723 | RNA binding                                                                          |
| 36  | 602   | 0.632953237795702 | 1.62794718956973e-11  | <0.001 | GO:0006396 | RNA processing                                                                       |
| 16  | 277   | 0.597979679500433 | 1.35166171675457e-05  | 0.022  | GO:0034660 | ncRNA metabolic process                                                              |
| 22  | 462   | 0.511423641446678 | 7.66202769258217e-06  | 0.015  | GO:0044265 | cellular macromolecule catabolic process                                             |
| 39  | 911   | 0.476845884038679 | 3.34218894462279e-08  | <0.001 | GO:0005654 | nucleoplasm                                                                          |
| 24  | 545   | 0.47631618686561  | 1.09283168115262e-05  | 0.018  | GO:0009057 | macromolecule catabolic process                                                      |
| 118 | 3431  | 0.473494407502489 | 1.56368496887015e-17  | <0.001 | GO:0032991 | macromolecular complex                                                               |
| 29  | 687   | 0.460527035699242 | 2.93531833594463e-06  | 0.005  | GO:0044429 | mitochondrial part                                                                   |
| 80  | 2160  | 0.454899179204351 | 5.73798891785767e-13  | <0.001 | GO:0090304 | nucleic acid metabolic process                                                       |
| 64  | 1662  | 0.453902252858483 | 4.77393199090586e-11  | <0.001 | GO:0016070 | RNA metabolic process                                                                |
| 51  | 1296  | 0.449261990101858 | 3.27437399406931e-09  | <0.001 | GO:0034645 | cellular macromolecule biosynthetic process                                          |
| 79  | 2153  | 0.448759965851525 | 1.38228172140963e-12  | <0.001 | GO:0044428 | nuclear part                                                                         |
| 52  | 1327  | 0.448329514135066 | 2.57197941829179e-09  | <0.001 | GO:0009059 | macromolecule biosynthetic process                                                   |
| 94  | 2686  | 0.444930025696524 | 6.62602821448192e-14  | <0.001 | GO:0006139 | nucleobase, nucleoside, nucleotide and nucleic acid metabolic process                |
| 77  | 2111  | 0.443065370078769 | 4.00922406264811e-12  | <0.001 | GO:0005829 | cytosol                                                                              |
| 127 | 4046  | 0.437107059343321 | 7.36675726742068e-16  | <0.001 | GO:0044260 | cellular macromolecule metabolic process                                             |
| 102 | 3093  | 0.424687277579968 | 1.53499538750493e-13  | <0.001 | GO:0034641 | cellular nitrogen compound metabolic process                                         |
| 234 | 11330 | 0.410177502418009 | 4.26279474281887e-11  | <0.001 | GO:0044424 | intracellular part                                                                   |
| 73  | 2121  | 0.408294011011211 | 2.6476698540441e-10   | <0.001 | GO:0044249 | cellular biosynthetic process                                                        |
| 102 | 3199  | 0.40626576617879  | 1.33115703600882e-12  | <0.001 | GO:0006807 | nitrogen compound metabolic process                                                  |
| 47  | 1315  | 0.398127144349952 | 2.71558632079032e-07  | <0.001 | GO:0005739 | mitochondrion                                                                        |
| 157 | 5867  | 0.394560459760076 | 4.17387500074186e-14  | <0.001 | GO:0044237 | cellular metabolic process                                                           |
| 150 | 5522  | 0.390555837986407 | 8.85159181992679e-14  | <0.001 | GO:0044446 | intracellular organelle part                                                         |
| 74  | 2232  | 0.390317428579321 | 1.04923257025558e-09  | <0.001 | GO:0009058 | biosynthetic process                                                                 |
| 131 | 4601  | 0.386021432185656 | 5.00037984912871e-13  | <0.001 | GO:0043170 | macromolecule metabolic process                                                      |
| 150 | 5601  | 0.381254965130809 | 3.18071089534335e-13  | <0.001 | GO:0044422 | organelle part                                                                       |
| 157 | 6058  | 0.372860438339392 | 8.46004601459964e-13  | <0.001 | GO:0044444 | cytoplasmic part                                                                     |
| 151 | 5992  | 0.342490468755501 | 4.80405598147904e-11  | <0.001 | GO:0044238 | primary metabolic process                                                            |
| 161 | 6632  | 0.334875288021427 | 1.12251899150943e-10  | <0.001 | GO:0008152 | metabolic process                                                                    |
| 63  | 2084  | 0.331075785878351 | 7.59282101998268e-07  | <0.001 | GO:0044267 | cellular protein metabolic process                                                   |
| 184 | 8242  | 0.317619158465355 | 1.64375270407462e-09  | <0.001 | GO:0043227 | membrane-bounded organelle                                                           |
| 183 | 8238  | 0.311179434676407 | 3.27953523717327e-09  | <0.001 | GO:0043231 | intracellular membrane-bounded organelle                                             |
| 194 | 9102  | 0.300093429975042 | 2.09541238702377e-08  | <0.001 | GO:0043229 | intracellular organelle                                                              |
| 194 | 9117  | 0.298556745854624 | 2.46813702747217e-08  | <0.001 | GO:0043226 | organelle                                                                            |
| 70  | 2644  | 0.269207945316679 | 1.84621206416052e-05  | 0.04   | GO:0019538 | protein metabolic process                                                            |
| 74  | 2821  | 0.267942614823057 | 1.34448891236763e-05  | 0.021  | GO:0043234 | protein complex                                                                      |
| 213 | 10840 | 0.265155481178129 | 2.70868933554443e-06  | 0.005  | GO:0009987 | cellular process                                                                     |

## Supplementary References

- Berriz GF, Beaver JE, Cenik C, Tasan M, Roth FP. 2009. Next generation software for functional trend analysis. *Bioinformatics* **25**(22):3043-3044.
- de Hoon MJ, Imoto S, Nolan J, Miyano S. 2004. Open source clustering software. *Bioinformatics* **20**(9):1453-1454.
- Djebali S, Davis CA, Merkel A, Dobin A, Lassmann T, Mortazavi A, Tanzer A, Lagarde J, Lin W, Schlesinger F, et al. 2012. Landscape of transcription in human cells. *Nature* **489**(7414):101–108.
- Harrow J, Frankish A, Gonzalez JM, Tapanari E, Diekhans M, Kokocinski F, Aken BL, Barrell D, Zadissa A, Searle S, et al. 2012. GENCODE: The reference human genome annotation for The ENCODE Project. *Genome Res.* **22**(9):1760-1774.
- Jin VX, Singer GA, Agosto-Pérez FJ, Liyanarachchi S, Davuluri RV. 2006. Genome-wide analysis of core promoter elements from conserved human and mouse orthologous pairs. *BMC Bioinformatics* **7**:114.
- Langfelder P, Horvath S. 2008. WGCNA: an R package for weighted correlation network analysis. *BMC Bioinformatics* **9**:559
- Langmead B, Trapnell C, Pop M, Salzberg SL. 2009. Ultrafast and memory-efficient alignment of short DNA sequences to the human genome. *Genome Biol.* **10**(3):R25.
- Saldanha AJ. 2004. Java Treeview—extensible visualization of microarray data. *Bioinformatics* **20**(17):3246-3248.
- Trapnell C, Pachter L, Salzberg SL. 2009. TopHat: discovering splice junctions with RNA-Seq. *Bioinformatics.* **25**(9):1105-1111.
- Trapnell C, Hendrickson DG, Sauvageau M, Goff L, Rinn JL, Pachter L. 2012. Differential analysis of gene regulation at transcript resolution with RNA-seq. *Nat Biotechnol.* **31**(1):46-53.
- Varley KE, Gertz J, Bowling KM, Parker SL, Reddy TE, Pauli-Behn F, Cross MK, Williams BA, Stamatoyannopoulos JA, Crawford GE, et al. 2013. Dynamic DNA methylation across diverse human cell lines and tissues. *Genome Res* **23**(3):555-567.
